# Supplementary material for: A theoretical study on borenium ion affinities toward ammonia, formaldehyde and chloride anions
Source: Royal Society of Chemistry journal article supplement (doi:10.1039/c5ra13825f), 2015-01-01
Supplement: c5ra13825f1.pdf [file c5ra13825f1.pdf]

# A Theoretical Study on Boremium Ion Affinities Toward Ammonia, Formaldehyde and Chloride Anion

Milovan Stojanović,<sup>a</sup> Marija Baranac-Stojanović<sup>\*b</sup>

<sup>a</sup>Center for Chemistry ICTM, University of Belgrade, P.O.Box 473, 11000 Belgrade, Serbia

<sup>b</sup>Faculty of Chemistry, University of Belgrade, Studentski trg 12-16, P.O.Box 158, 11000 Belgrade, Serbia

## *Supplementary Information*

### **Table of Contents**

|                                                                                                                                                          |     |
|----------------------------------------------------------------------------------------------------------------------------------------------------------|-----|
| Theory level employed in the study.....                                                                                                                  | S2  |
| Ammonia affinities of <b>4-8</b> at various theory levels and effect of inclusion of CP correction<br>in geometry optimization.....                      | S3  |
| Calculated B–R/R' and B–L bond lengths, NBO charges at boron atom<br>and electron occupancies of boron's p-orbital of boremium cations <b>4-29</b> ..... | S4  |
| Energy decomposition analysis of binding interactions in BF <sub>3</sub> –NH <sub>3</sub> and BCl <sub>3</sub> –NH <sub>3</sub> .....                    | S5  |
| Figures S1-S4. Optimized structures of boremium cations and their adducts<br>with NH <sub>3</sub> , HCHO and Cl <sup>–</sup> .....                       | S6  |
| Absolute energies and x, y, z coordinates of the optimized structures.....                                                                               | S10 |

## Theory level employed in the study

The choice of the M06-2X functional has been made on the basis of literature data showing its ability to accurately model various amine-borane complexes when combined with the 6-311++G(3df,2p) basis set (ref. 2b, 6 and 13 in the manuscript). To make a compromise between the accuracy and computational time, we have chosen a smaller 6-311++G(d,p) basis set which was first tested by computing binding enthalpies of several amine-borane adducts and by comparing them with previously calculated and experimental data (Table S1). Our calculated values (the first row in the Table) are in excellent agreement with previous calculations and also with experimental data.

**Table S1.** Comparison of calculated binding enthalpies  $\Delta H$  with experimental values and previous calculations (kcal/mol).<sup>a</sup>

|                   | BF <sub>3</sub> -NH <sub>3</sub> | BCl <sub>3</sub> -NH <sub>3</sub> | BH <sub>3</sub> -NH <sub>3</sub> | BMe <sub>3</sub> -NH <sub>3</sub> | BMe <sub>3</sub> -NH <sub>2</sub> Me | BMe <sub>3</sub> -NHMe <sub>2</sub> | BMe <sub>3</sub> -NMe <sub>3</sub> |
|-------------------|----------------------------------|-----------------------------------|----------------------------------|-----------------------------------|--------------------------------------|-------------------------------------|------------------------------------|
| Calc <sup>b</sup> | -22.4                            | -25.6                             | -27.0                            | -13.8                             | -17.9                                | -18.7                               | -17.3 <sup>c</sup>                 |
| Calc <sup>d</sup> | -20.2                            | -25.1                             | -27.8                            | -14.2                             | -18.4                                | -19.2                               | -17.8                              |
| Exp <sup>e</sup>  | /                                | -24.0                             | -27.5 ± 0.5                      | -13.8 ± 0.3                       | -17.6 ± 0.2                          | -19.3 ± 0.3                         | -17.6 ± 0.2                        |

<sup>a</sup> Enthalpies are corrected for the BSSE by using the counterpoise method. Temperatures are 298.15 K for BF<sub>3</sub>-NH<sub>3</sub>, BCl<sub>3</sub>-NH<sub>3</sub> and BH<sub>3</sub>-NH<sub>3</sub>, 373 K for BMe<sub>3</sub>-NH<sub>3</sub>, BMe<sub>3</sub>-NH<sub>2</sub>Me, BMe<sub>3</sub>-NHMe<sub>2</sub> and BMe<sub>3</sub>-NMe<sub>3</sub>. <sup>b</sup> Calculated at the M06-2X/6-311++G(d,p)/M06-2X/6-311++G(d,p) level, this work. <sup>c</sup> Enthalpy corrections were obtained at the M06-2X/6-31++G(d,p) level, this work. <sup>d</sup> Data for BF<sub>3</sub>-NH<sub>3</sub> and BCl<sub>3</sub>-NH<sub>3</sub> are taken from ref. 6 in the manuscript. Data for BH<sub>3</sub>-NH<sub>3</sub>, BMe<sub>3</sub>-NH<sub>3</sub>, BMe<sub>3</sub>-NH<sub>2</sub>Me, BMe<sub>3</sub>-NHMe<sub>2</sub> and BMe<sub>3</sub>-NMe<sub>3</sub> are taken from ref. 13 in the manuscript. All these calculations were done at the M06-2X/6-311++G(3df,2p) level. Enthalpy corrections were obtained by using the B3LYP/6-31G(d). <sup>e</sup> Value for BCl<sub>3</sub>-NH<sub>3</sub> is taken from ref. 6 and all others from ref. 13 in the manuscript.

## Ammonia affinities of 4-8 at various theory levels and effect of inclusion of CP corrections in geometry optimization

We have also calculated NH<sub>3</sub> affinities of selected borenium cations **4-8** at the DFT level, using the same M06-2X functional and the correlation-consistent aug-cc-pVDZ basis set, and at the MP2 level using the same 6-311++G(d,p) basis set. The effect of CP corrections on molecular structure and thus obtained  $\Delta H$ s/ $\Delta E$ s was tested, too. All results are presented in Table S2, which also includes the M06-2X/6-311++G(d,p) data, presented in the manuscript.

The change of the basis set from 6-311++G(d,p) to aug-cc-pVDZ decreases slightly the B–N distances (by up to 0.007 Å) and increases slightly  $\Delta H$  and  $\Delta E$  values, by up to 1.29 kcal/mol and 1.01 kcal/mol, respectively. At the MP2 level, the B–N distances differ insignificantly (< 0.004 Å) from those obtained at the M06-2X/6-311++G(d,p) level and  $\Delta H$ s/ $\Delta E$ s decrease by up to 8.4 kcal/mol/6.9 kcal/mol. Both methods retain the same trend in  $\Delta H$ s/ $\Delta E$ s.

The CP corrections involved in geometry optimization increase the B–N bond lengths just slightly, by up to 0.005 Å. All other bond lengths change by less than 0.002 Å, while the NBN and RBR' bond angles differ by less than 0.3°. Changes in binding enthalpies do not exceed 0.03 kcal/mol, while binding energies vary by up to 0.28 kcal/mol.

**Table S2.** Calculated B-NH<sub>3</sub> distances ( $d_{\text{BN}}$ , Å) and counterpoise-corrected NH<sub>3</sub> affinities ( $\Delta H$  at 298.15 K and  $\Delta E$ , kcal/mol) at various levels of theory for borenium cations **4-8**.

| ion      | M06-2X/6-311++G(d,p) |            |            | M06-2X/6-311++G(d,p) <sup>a</sup> |            |            | M06-2X/aug-cc-pVDZ |            |            | MP2/6-311++G(d,p) |            |            |
|----------|----------------------|------------|------------|-----------------------------------|------------|------------|--------------------|------------|------------|-------------------|------------|------------|
|          | $d_{\text{BN}}$      | $\Delta H$ | $\Delta E$ | $d_{\text{BN}}$                   | $\Delta H$ | $\Delta E$ | $d_{\text{BN}}$    | $\Delta H$ | $\Delta E$ | $d_{\text{BN}}$   | $\Delta H$ | $\Delta E$ |
| <b>4</b> | 1.613                | -54.37     | -58.88     | 1.615                             | -54.39     | -59.16     | 1.609              | -54.84     | -59.61     | 1.614             | -51.23     | -55.65     |
| <b>5</b> | 1.618                | -49.82     | -52.40     | 1.622                             | -49.84     | -52.46     | 1.611              | -49.90     | -53.26     | 1.621             | -42.67     | -45.52     |
| <b>6</b> | 1.608                | -44.83     | -48.23     | 1.613                             | -44.86     | -48.02     | 1.602              | -46.01     | -49.24     | 1.612             | -36.47     | -39.74     |
| <b>7</b> | 1.640                | -36.69     | -40.47     | 1.643                             | -36.72     | -40.48     | 1.637              | -36.81     | -40.61     | 1.639             | -33.37     | -37.16     |
| <b>8</b> | 1.621                | -33.85     | -37.07     | 1.626                             | -33.84     | -37.03     | 1.619              | -35.14     | -37.62     | 1.623             | -27.96     | -31.26     |

<sup>a</sup> Counterpoise corrections were included in geometry optimization.

**Table S3.** Calculated B–R/R' and B–L bond lengths ( $d_{BR}$ ,  $d_{BR'}$  and  $d_{BL}$ , Å), NBO charges at boron atom and electron occupancies of boron's p-orbital of borenium cations **4-29**.

| ion       | R  | R' | L                                                                                   | $d_{BR}$ | $d_{BR'}$ | $d_{BL}$ | charge at boron | electron occupancy |
|-----------|----|----|-------------------------------------------------------------------------------------|----------|-----------|----------|-----------------|--------------------|
| <b>4</b>  | H  | H  | NH <sub>3</sub>                                                                     | 1.175    | 1.175     | 1.552    | 0.687           | 0.023              |
| <b>5</b>  | F  | F  | NH <sub>3</sub>                                                                     | 1.285    | 1.285     | 1.549    | 1.412           | 0.289              |
| <b>6</b>  | Cl | Cl | NH <sub>3</sub>                                                                     | 1.701    | 1.701     | 1.564    | 0.566           | 0.460              |
| <b>7</b>  | Me | Me | NH <sub>3</sub>                                                                     | 1.538    | 1.538     | 1.587    | 1.087           | 0.167              |
| <b>8</b>  | P  | P  | NH <sub>3</sub>                                                                     | 1.864    | 1.864     | 1.562    | 0.124           | 0.501              |
| <b>9</b>  | Me | Ph | NH <sub>3</sub>                                                                     | 1.545    | 1.517     | 1.592    | 1.041           | 0.249              |
| <b>10</b> | Ph | Ph | NH <sub>3</sub>                                                                     | 1.525    | 1.527     | 1.584    | 1.025           | 0.285              |
| <b>11</b> | O  | O  | NH <sub>3</sub>                                                                     | 1.342    | 1.342     | 1.535    | 1.185           | 0.438              |
| <b>12</b> | P  | S  | NH <sub>3</sub>                                                                     | 1.898    | 1.748     | 1.563    | 0.218           | 0.542              |
| <b>13</b> | P  | O  | NH <sub>3</sub>                                                                     | 1.907    | 1.320     | 1.561    | 0.781           | 0.378              |
| <b>14</b> | S  | S  | NH <sub>3</sub>                                                                     | 1.765    | 1.765     | 1.560    | 0.279           | 0.613              |
| <b>15</b> | O  | O  | NH <sub>3</sub>                                                                     | 1.328    | 1.328     | 1.541    | 1.205           | 0.411              |
| <b>16</b> | O  | S  | NH <sub>3</sub>                                                                     | 1.328    | 1.769     | 1.553    | 0.809           | 0.481              |
| <b>17</b> | N  | S  | NH <sub>3</sub>                                                                     | 1.376    | 1.784     | 1.557    | 0.691           | 0.536              |
| <b>18</b> | N  | O  | NH <sub>3</sub>                                                                     | 1.376    | 1.340     | 1.549    | 1.103           | 0.457              |
| <b>19</b> | P  | N  | NH <sub>3</sub>                                                                     | 1.913    | 1.369     | 1.564    | 0.631           | 0.462              |
| <b>20</b> | N  | N  | NH <sub>3</sub>                                                                     | 1.388    | 1.388     | 1.556    | 0.997           | 0.494              |
| <b>21</b> | N  | O  | SMe <sub>2</sub>                                                                    | 1.375    | 1.347     | 1.905    | 0.892           | 0.474              |
| <b>22</b> | N  | O  | OMe <sub>2</sub>                                                                    | 1.382    | 1.343     | 1.449    | 1.216           | 0.447              |
| <b>23</b> | N  | O  | NMe <sub>3</sub>                                                                    | 1.383    | 1.350     | 1.535    | 1.208           | 0.438              |
| <b>24</b> | N  | O  | PMe <sub>3</sub>                                                                    | 1.384    | 1.355     | 1.939    | 0.766           | 0.455              |
| <b>25</b> | N  | O  | PH <sub>3</sub>                                                                     | 1.377    | 1.344     | 1.956    | 0.784           | 0.478              |
| <b>26</b> | N  | O  |  | 1.390    | 1.361     | 1.582    | 0.959           | 0.441              |
| <b>27</b> | N  | O  |  | 1.395    | 1.363     | 1.575    | 0.947           | 0.436              |
| <b>28</b> | N  | O  |  | 1.395    | 1.362     | 1.584    | 0.957           | 0.430              |
| <b>29</b> | N  | O  |  | 1.386    | 1.351     | 1.521    | 1.187           | 0.438              |

## Energy decomposition analysis of binding interactions in BF<sub>3</sub>-NH<sub>3</sub> and BCl<sub>3</sub>-NH<sub>3</sub>

**Table S4.** Calculated B-N distances ( $d_{\text{BN}}$ , Å), NH<sub>3</sub> affinities ( $\Delta E$ ) and energy decomposition of binding interactions of BF<sub>3</sub> and BCl<sub>3</sub> with NH<sub>3</sub> (kcal/mol).<sup>a-d</sup>

|                  | $d_{\text{BN}}$ | $\Delta E$ | $\Delta E_{\text{def}}$ | $\Delta E_{\text{int}}$ | $\Delta E_{\text{elstat}}$ | $\Delta E_{\text{ex+rep}}$ | $\Delta E_{\text{oi}}$ | $\Delta E_{\text{disp}}$ |
|------------------|-----------------|------------|-------------------------|-------------------------|----------------------------|----------------------------|------------------------|--------------------------|
| BF <sub>3</sub>  | 1.668           | -24.74     | 23.57                   | -48.31                  | -95.35                     | 144.50                     | -75.00                 | -22.46                   |
|                  |                 |            |                         |                         | (49.5%)                    |                            | (38.9%)                | (11.6%)                  |
| BCl <sub>3</sub> | 1.617           | -28.50     | 23.59                   | -52.09                  | -119.84                    | 206.74                     | -113.05                | -25.94                   |
|                  |                 |            |                         |                         | (46.3%)                    |                            | (43.7%)                | (10.0%)                  |

<sup>a</sup> Calculated at the M06-2X/6-311++G(d,p)//M06-2X/6-311++G(d,p) level. <sup>b</sup> Binding energies ( $\Delta E$ ) and all interaction energy terms are corrected for the BSSE by using the counterpoise method. <sup>c</sup>  $\Delta E$  = total binding energy,  $\Delta E_{\text{def}}$  = deformation energy,  $\Delta E_{\text{int}}$  = interaction energy,  $\Delta E_{\text{elstat}}$  = electrostatic energy,  $\Delta E_{\text{ex+rep}}$  = exchange repulsion energy,  $\Delta E_{\text{oi}}$  = orbital interaction energy,  $\Delta E_{\text{disp}}$  = dispersion energy. <sup>d</sup> Values in parentheses are percentage contribution to all attractive interactions.

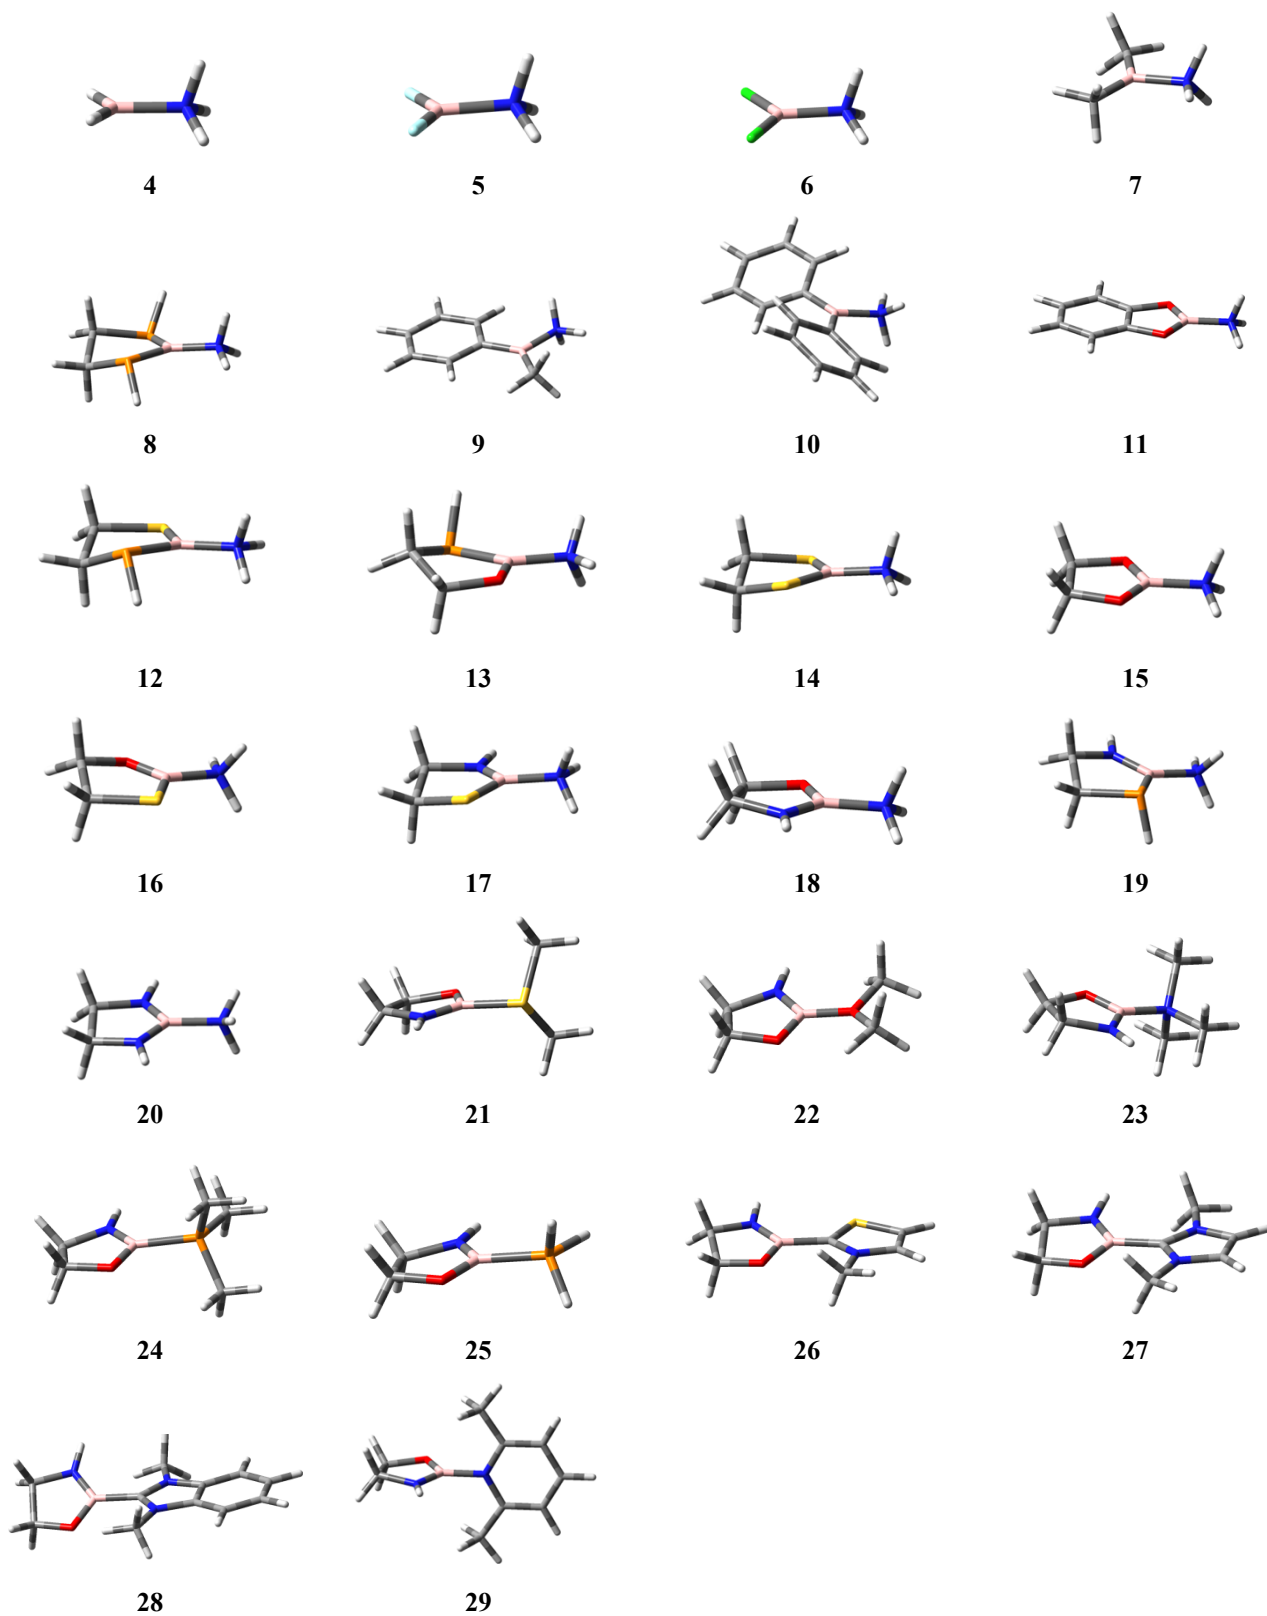

**Figure S1.** Optimized structures of borenium cations 4-29.

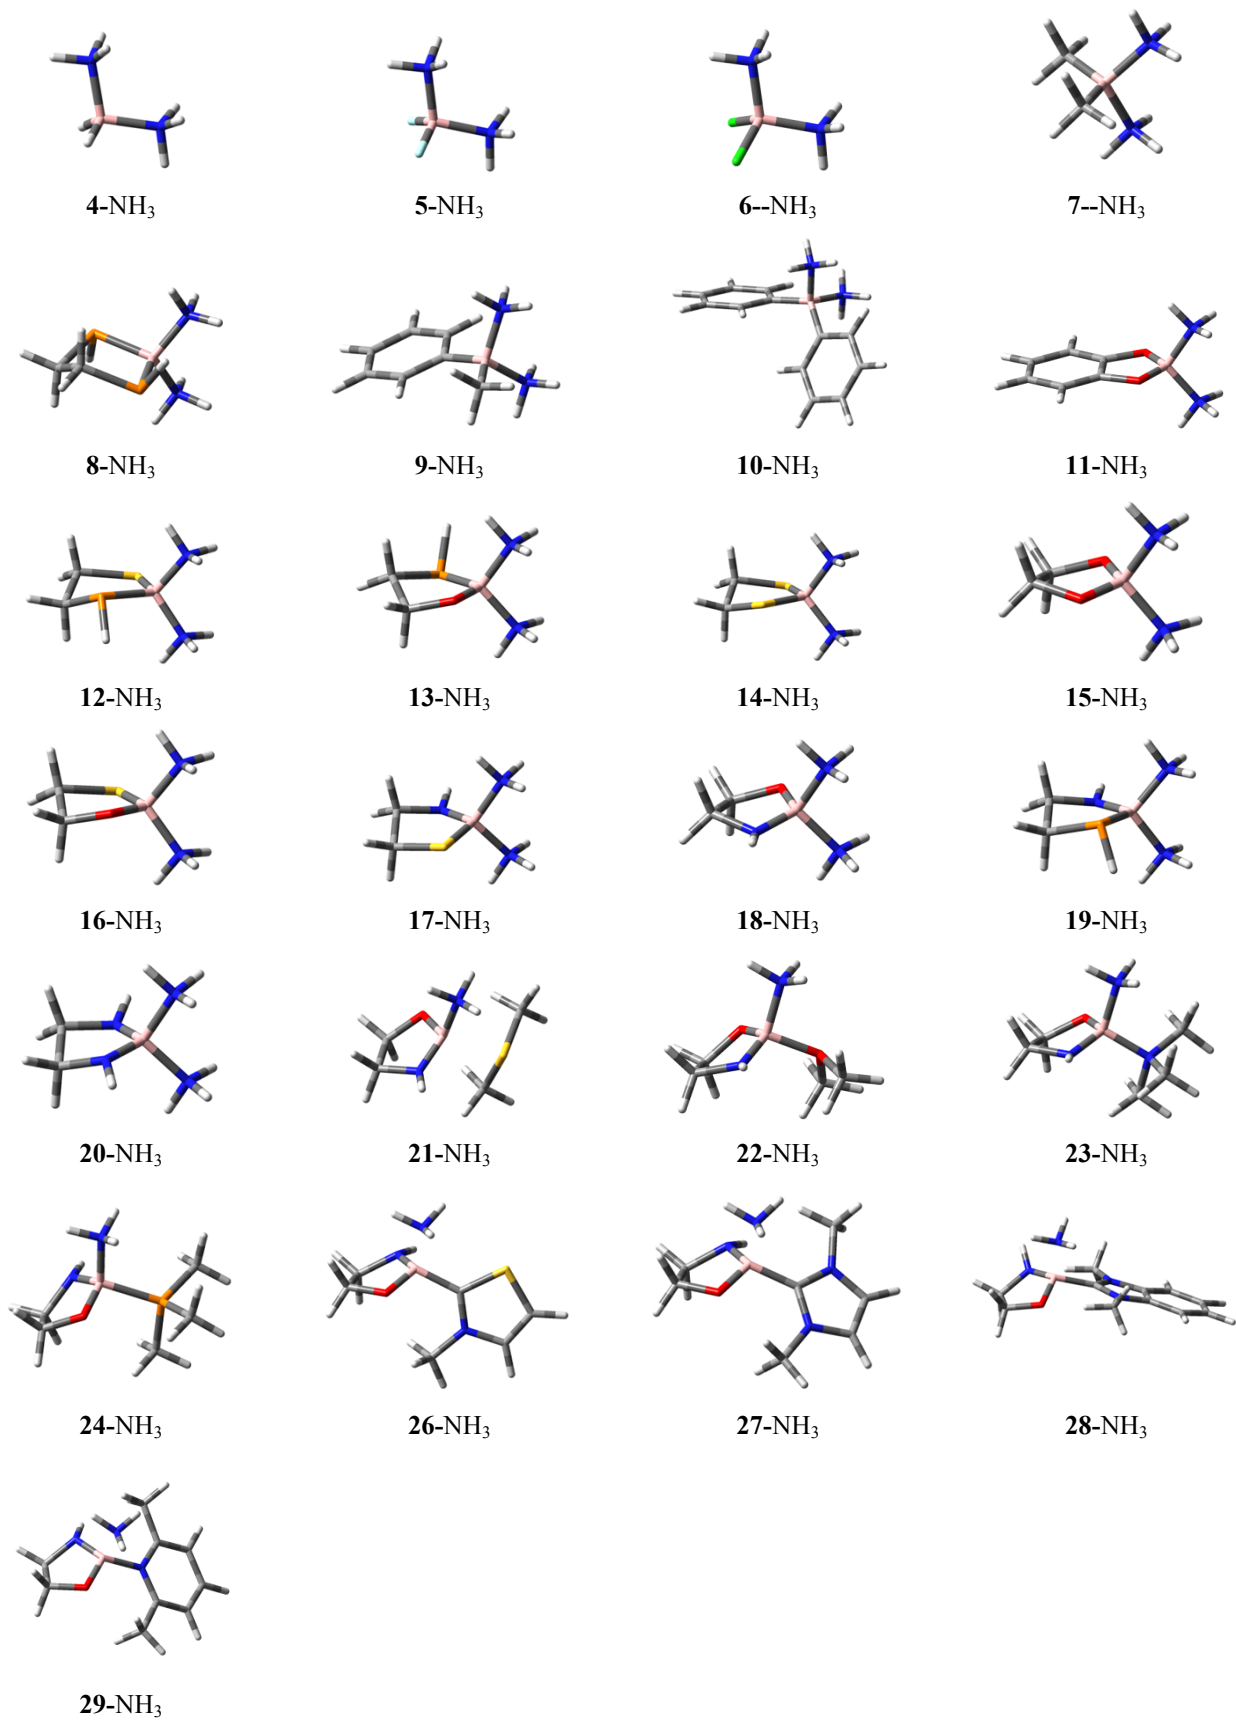

**Figure S2.** Optimized structures of NH<sub>3</sub>-complexes of borenium cations 4-29.

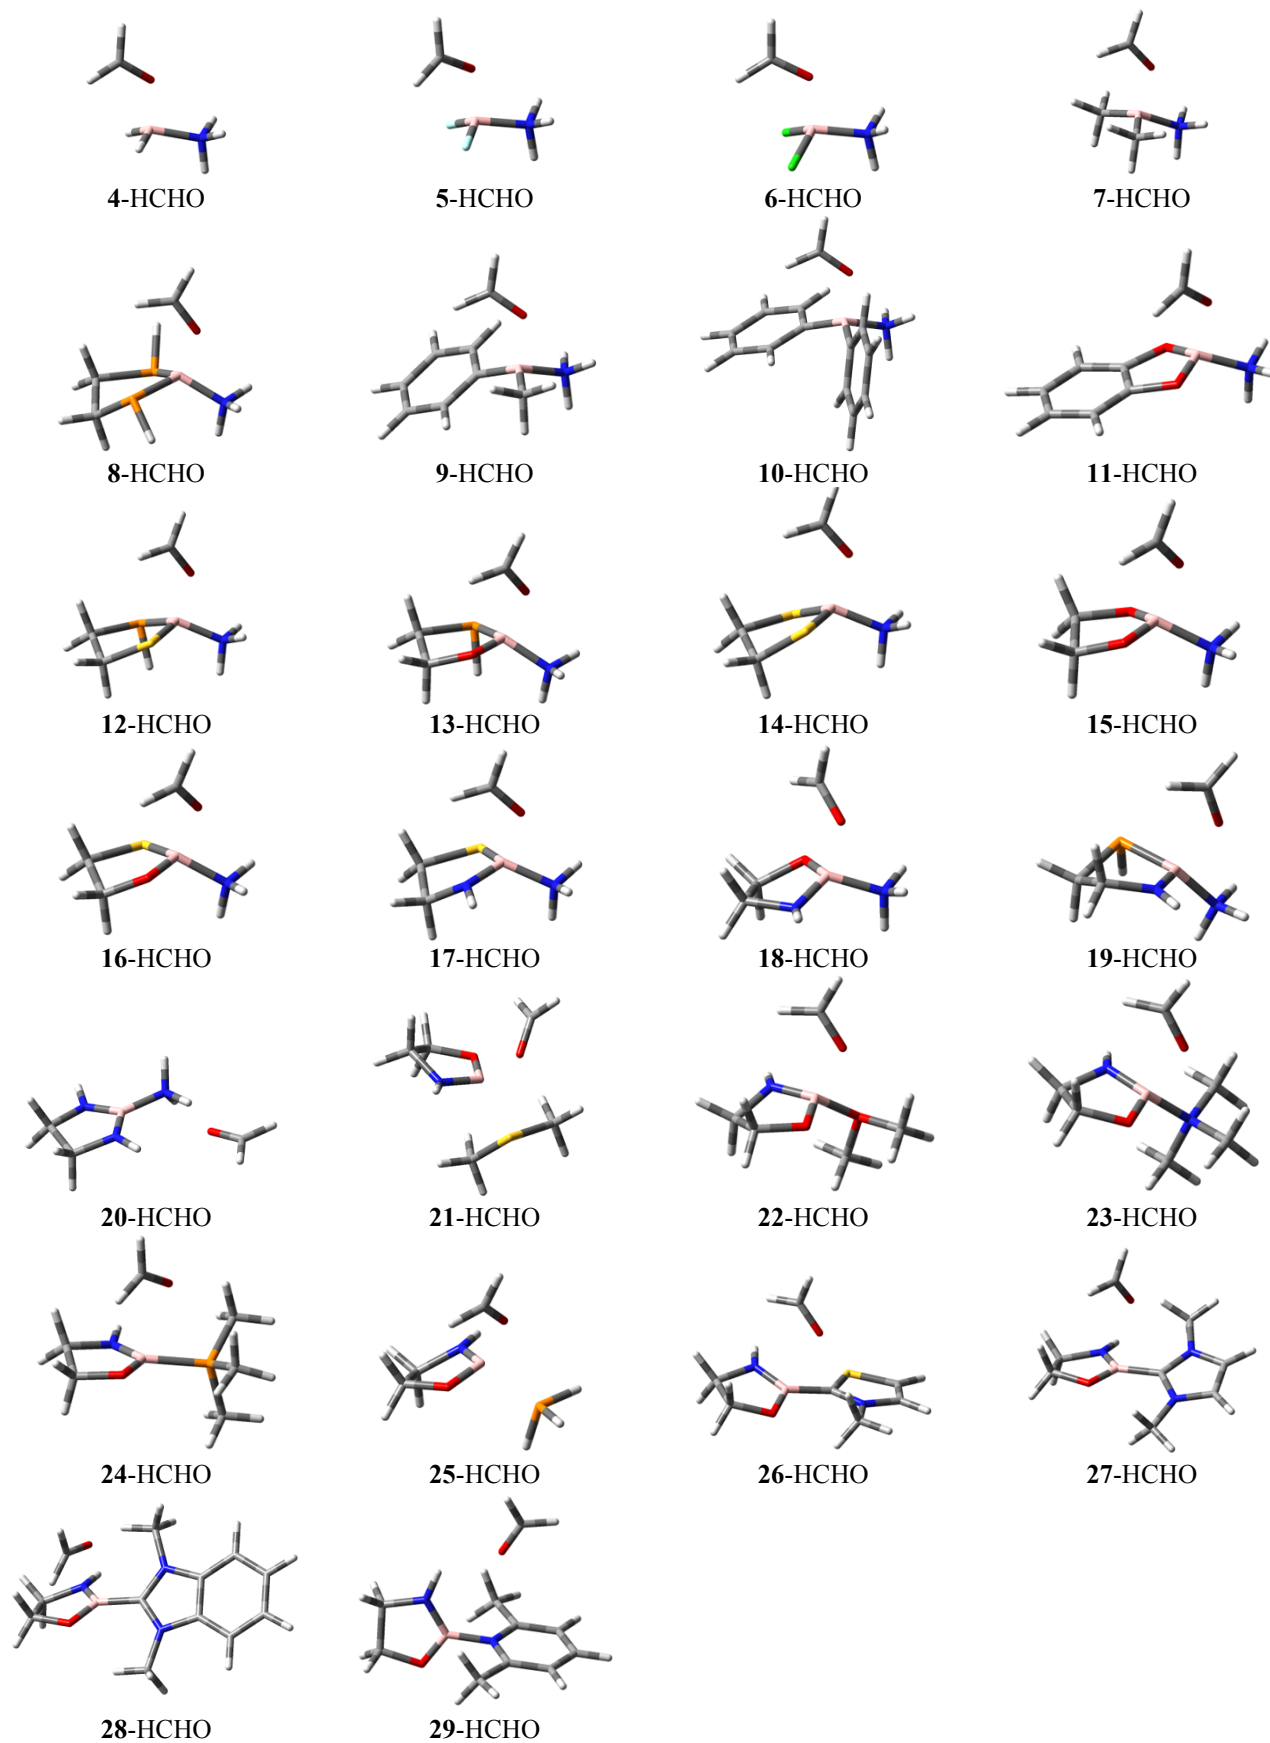

**Figure S3.** Optimized structures of HCHO-complexes of borenium cations 4-29.



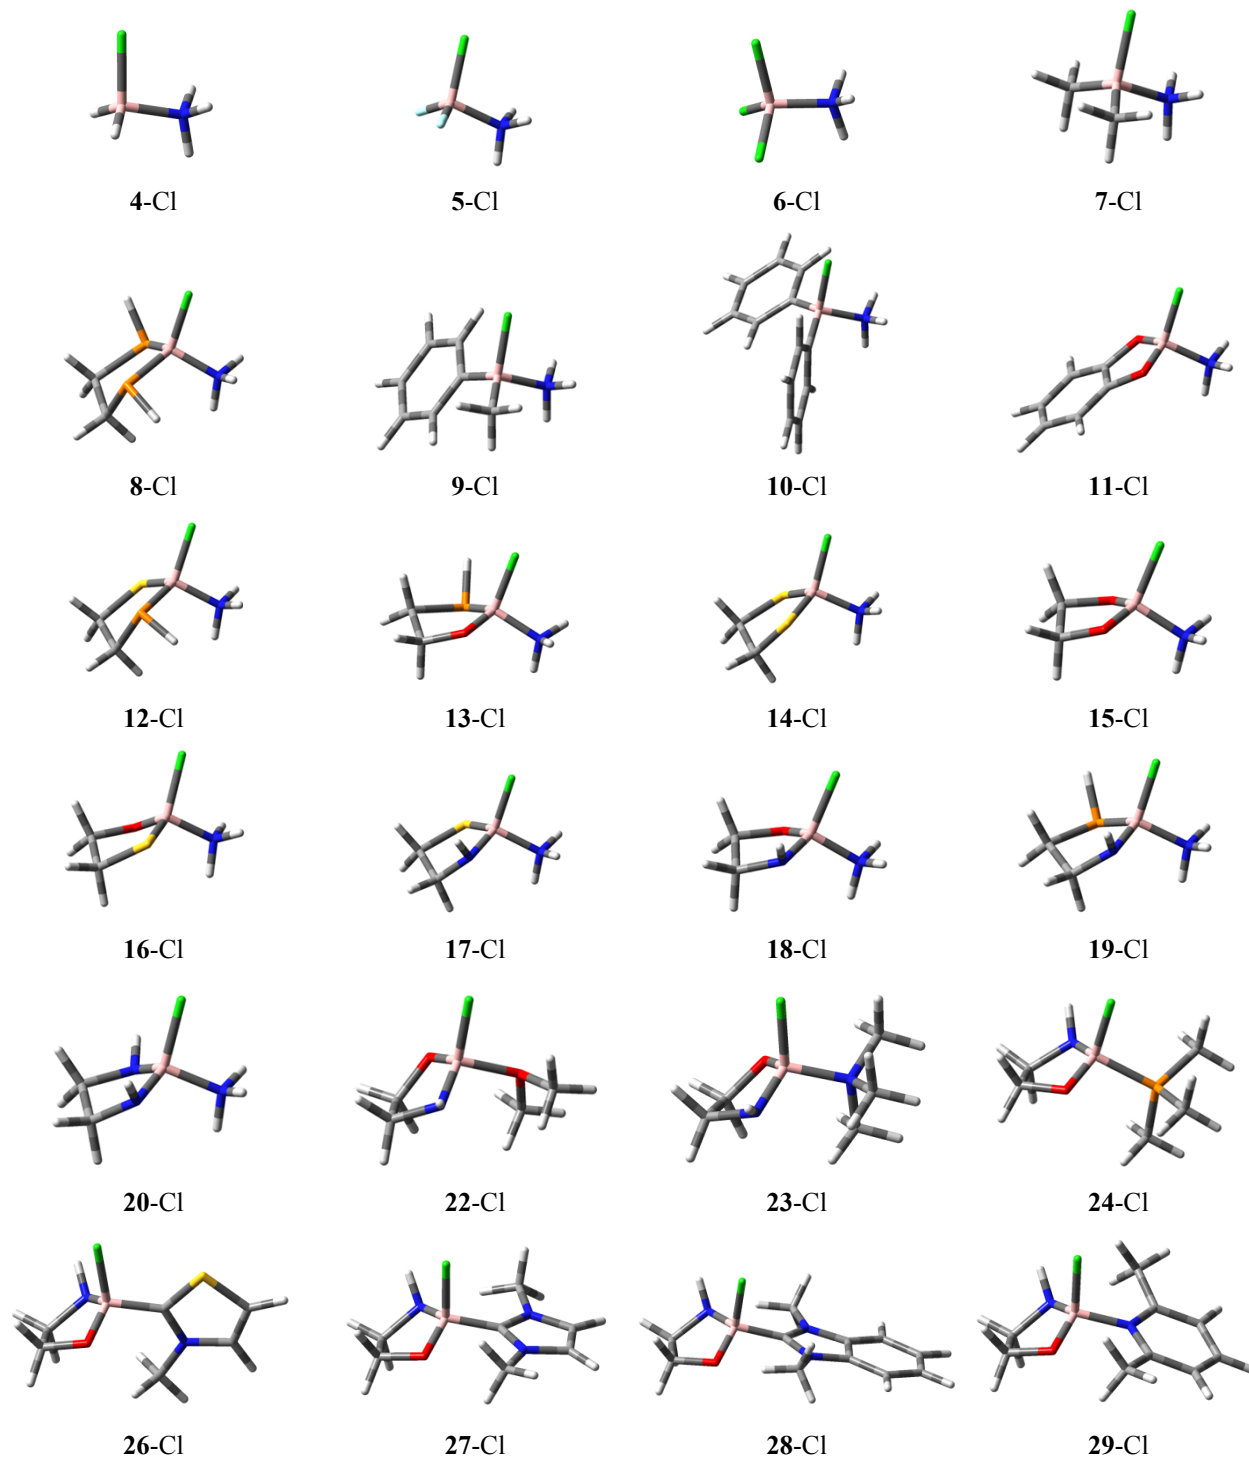

**Figure S4.** Optimized structures of Cl<sup>-</sup>-adducts of borenium cations 4-29.

## Absolute energies (a.u.) and x, y, z coordinates (Å) of the optimized structures

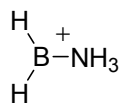

**4**

E = -82.3196993 a.u. *i*: -140.23 cm<sup>-1</sup>

| Center<br>Number | Atomic<br>Number | Atomic<br>Type | Coordinates (Angstroms) |           |           |
|------------------|------------------|----------------|-------------------------|-----------|-----------|
|                  |                  |                | X                       | Y         | Z         |
| 1                | 5                | 0              | -0.921037               | 0.001008  | -0.008187 |
| 2                | 1                | 0              | -1.417416               | -1.064477 | 0.004699  |
| 3                | 1                | 0              | -1.434012               | 1.058105  | 0.005894  |
| 4                | 7                | 0              | 0.631122                | 0.003601  | -0.007513 |
| 5                | 1                | 0              | 1.046800                | 0.880182  | -0.338392 |
| 6                | 1                | 0              | 0.959486                | -0.127513 | 0.961461  |
| 7                | 1                | 0              | 1.032478                | -0.776544 | -0.540138 |

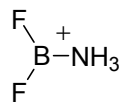

**5**

E = -280.9505696 a.u.

| Center<br>Number | Atomic<br>Number | Atomic<br>Type | Coordinates (Angstroms) |           |           |
|------------------|------------------|----------------|-------------------------|-----------|-----------|
|                  |                  |                | X                       | Y         | Z         |
| 1                | 5                | 0              | -0.004933               | 0.196159  | 0.000000  |
| 2                | 7                | 0              | -0.000966               | -1.353330 | 0.000000  |
| 3                | 1                | 0              | 0.963946                | -1.714558 | 0.000000  |
| 4                | 1                | 0              | -0.457561               | -1.740207 | 0.835703  |
| 5                | 9                | 0              | -0.000966               | 0.760416  | -1.154852 |
| 6                | 9                | 0              | -0.000966               | 0.760416  | 1.154852  |
| 7                | 1                | 0              | -0.457561               | -1.740207 | -0.835703 |

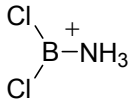

6

E = -1001.6270049 a.u.

| Center<br>Number | Atomic<br>Number | Atomic<br>Type | Coordinates (Angstroms) |           |           |
|------------------|------------------|----------------|-------------------------|-----------|-----------|
|                  |                  |                | X                       | Y         | Z         |
| 1                | 5                | 0              | -0.008701               | 0.179850  | 0.000000  |
| 2                | 17               | 0              | -0.008701               | -0.572486 | 1.526059  |
| 3                | 17               | 0              | -0.008701               | -0.572486 | -1.526059 |
| 4                | 7                | 0              | 0.025543                | 1.743781  | 0.000000  |
| 5                | 1                | 0              | 1.000699                | 2.073462  | 0.000000  |
| 6                | 1                | 0              | -0.420076               | 2.142665  | -0.834536 |
| 7                | 1                | 0              | -0.420076               | 2.142665  | 0.834536  |

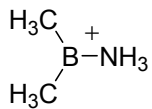

7

E = -160.9871136 a.u.

| Center<br>Number | Atomic<br>Number | Atomic<br>Type | Coordinates (Angstroms) |           |           |
|------------------|------------------|----------------|-------------------------|-----------|-----------|
|                  |                  |                | X                       | Y         | Z         |
| 1                | 5                | 0              | -0.003220               | -0.127703 | -0.001897 |
| 2                | 7                | 0              | 0.031337                | 1.459042  | 0.000225  |
| 3                | 1                | 0              | 0.972950                | 1.858295  | 0.031323  |
| 4                | 1                | 0              | -0.442099               | 1.830152  | -0.830858 |
| 5                | 6                | 0              | 1.376695                | -0.806045 | 0.006570  |
| 6                | 1                | 0              | 2.065123                | -0.376436 | 0.742619  |
| 7                | 1                | 0              | 1.319904                | -1.882538 | 0.162246  |
| 8                | 1                | 0              | 1.852375                | -0.644874 | -0.973195 |
| 9                | 6                | 0              | -1.410501               | -0.747578 | -0.007851 |
| 10               | 1                | 0              | -1.450536               | -1.606177 | -0.684633 |
| 11               | 1                | 0              | -1.577477               | -1.179163 | 0.990930  |
| 12               | 1                | 0              | -2.246473               | -0.080328 | -0.223535 |
| 13               | 1                | 0              | -0.494192               | 1.828025  | 0.800702  |

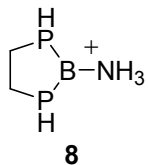

E = -843.6514296 a.u.

| Center<br>Number | Atomic<br>Number | Atomic<br>Type | Coordinates (Angstroms) |           |           |
|------------------|------------------|----------------|-------------------------|-----------|-----------|
|                  |                  |                | X                       | Y         | Z         |
| 1                | 5                | 0              | -0.947444               | 0.004911  | -0.014455 |
| 2                | 6                | 0              | 1.687987                | 0.688114  | -0.322679 |
| 3                | 1                | 0              | 2.537004                | 1.274275  | 0.027015  |
| 4                | 1                | 0              | 1.745202                | 0.604424  | -1.409327 |
| 5                | 6                | 0              | 1.677247                | -0.697465 | 0.337720  |
| 6                | 1                | 0              | 2.527634                | -1.289908 | 0.002068  |
| 7                | 1                | 0              | 1.718379                | -0.613264 | 1.425036  |
| 8                | 15               | 0              | 0.097487                | 1.535257  | 0.182371  |
| 9                | 1                | 0              | -0.267195               | 2.372979  | -0.893955 |
| 10               | 7                | 0              | -2.509133               | 0.007107  | 0.004552  |
| 11               | 1                | 0              | -2.921659               | 0.878454  | -0.340448 |
| 12               | 1                | 0              | -2.901431               | -0.762943 | -0.545484 |
| 13               | 1                | 0              | -2.845009               | -0.118943 | 0.966203  |
| 14               | 15               | 0              | 0.089828                | -1.534494 | -0.192779 |
| 15               | 1                | 0              | -0.292906               | -2.374720 | 0.875165  |

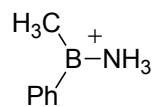

9

E = -352.7034143 a.u.

| Center<br>Number | Atomic<br>Number | Atomic<br>Type | Coordinates (Angstroms) |           |           |
|------------------|------------------|----------------|-------------------------|-----------|-----------|
|                  |                  |                | X                       | Y         | Z         |
| 1                | 5                | 0              | 1.616920                | 0.110015  | -0.003045 |
| 2                | 7                | 0              | 2.361354                | -1.296918 | 0.014957  |
| 3                | 1                | 0              | 2.028513                | -1.884298 | 0.785102  |
| 4                | 1                | 0              | 2.171774                | -1.818036 | -0.847036 |
| 5                | 1                | 0              | 3.375655                | -1.205409 | 0.103050  |
| 6                | 6                | 0              | 0.101802                | 0.036853  | -0.002444 |
| 7                | 6                | 0              | -0.611803               | -1.180908 | -0.008658 |
| 8                | 6                | 0              | -0.638276               | 1.236435  | 0.005059  |
| 9                | 6                | 0              | -1.995173               | -1.200519 | -0.008284 |
| 10               | 1                | 0              | -0.095408               | -2.137587 | -0.018618 |
| 11               | 6                | 0              | -2.024422               | 1.220299  | 0.008890  |
| 12               | 1                | 0              | -0.121300               | 2.188646  | 0.009900  |
| 13               | 6                | 0              | -2.700142               | 0.003461  | 0.001659  |
| 14               | 1                | 0              | -2.529317               | -2.142255 | -0.015351 |
| 15               | 1                | 0              | -2.579538               | 2.149845  | 0.016635  |
| 16               | 1                | 0              | -3.783734               | -0.010624 | 0.003427  |
| 17               | 6                | 0              | 2.588553                | 1.310980  | -0.013377 |
| 18               | 1                | 0              | 3.187910                | 1.319465  | 0.907243  |
| 19               | 1                | 0              | 3.309600                | 1.229996  | -0.836570 |
| 20               | 1                | 0              | 2.098528                | 2.278998  | -0.094331 |

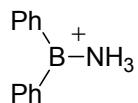

10

E = -544.4158015 a.u.

| Center<br>Number | Atomic<br>Number | Atomic<br>Type | Coordinates (Angstroms) |           |           |
|------------------|------------------|----------------|-------------------------|-----------|-----------|
|                  |                  |                | X                       | Y         | Z         |
| 1                | 5                | 0              | -0.004725               | 0.902805  | 0.018237  |
| 2                | 7                | 0              | -0.013925               | 2.486031  | 0.080509  |
| 3                | 1                | 0              | -0.669784               | 2.897827  | -0.588676 |
| 4                | 1                | 0              | -0.318713               | 2.786831  | 1.011672  |
| 5                | 1                | 0              | 0.913826                | 2.888802  | -0.069306 |
| 6                | 6                | 0              | -1.386848               | 0.259074  | -0.012766 |
| 7                | 6                | 0              | -1.531589               | -1.050211 | -0.512589 |
| 8                | 6                | 0              | -2.547863               | 0.938150  | 0.409733  |
| 9                | 6                | 0              | -2.779204               | -1.652631 | -0.581065 |
| 10               | 1                | 0              | -0.660568               | -1.583415 | -0.876341 |
| 11               | 6                | 0              | -3.792073               | 0.332588  | 0.357592  |
| 12               | 1                | 0              | -2.493075               | 1.946574  | 0.812867  |
| 13               | 6                | 0              | -3.906080               | -0.964788 | -0.140629 |
| 14               | 1                | 0              | -2.876978               | -2.654377 | -0.980674 |
| 15               | 1                | 0              | -4.672266               | 0.862671  | 0.699539  |
| 16               | 1                | 0              | -4.880127               | -1.437171 | -0.190699 |
| 17               | 6                | 0              | 1.384825                | 0.269226  | 0.024012  |
| 18               | 6                | 0              | 1.571783                | -0.995863 | 0.615303  |
| 19               | 6                | 0              | 2.508855                | 0.913673  | -0.529961 |
| 20               | 6                | 0              | 2.828118                | -1.582105 | 0.658526  |
| 21               | 1                | 0              | 0.729065                | -1.503914 | 1.070839  |
| 22               | 6                | 0              | 3.759182                | 0.317156  | -0.511722 |
| 23               | 1                | 0              | 2.415924                | 1.873957  | -1.032886 |
| 24               | 6                | 0              | 3.918777                | -0.929485 | 0.090435  |
| 25               | 1                | 0              | 2.960252                | -2.546660 | 1.133083  |
| 26               | 1                | 0              | 4.607891                | 0.815953  | -0.962817 |
| 27               | 1                | 0              | 4.898348                | -1.392021 | 0.117433  |

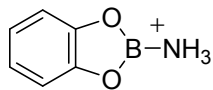

11

E = -462.7144704 a.u.

| Center Number | Atomic Number | Atomic Type | Coordinates (Angstroms) |           |           |
|---------------|---------------|-------------|-------------------------|-----------|-----------|
|               |               |             | X                       | Y         | Z         |
| 1             | 6             | 0           | -0.001190               | -0.243560 | 0.693751  |
| 2             | 6             | 0           | -0.001190               | -0.243560 | -0.693751 |
| 3             | 6             | 0           | 0.000433                | -1.401879 | -1.435674 |
| 4             | 6             | 0           | 0.002421                | -2.587117 | -0.697920 |
| 5             | 6             | 0           | 0.002421                | -2.587117 | 0.697920  |
| 6             | 6             | 0           | 0.000433                | -1.401879 | 1.435674  |
| 7             | 1             | 0           | -0.000060               | -1.389091 | -2.517213 |
| 8             | 1             | 0           | 0.004112                | -3.531681 | -1.226516 |
| 9             | 1             | 0           | 0.004112                | -3.531681 | 1.226516  |
| 10            | 1             | 0           | -0.000060               | -1.389091 | 2.517213  |
| 11            | 8             | 0           | -0.004635               | 1.086029  | -1.144644 |
| 12            | 8             | 0           | -0.004635               | 1.086029  | 1.144644  |
| 13            | 5             | 0           | -0.003382               | 1.786056  | 0.000000  |
| 14            | 7             | 0           | 0.003934                | 3.320591  | 0.000000  |
| 15            | 1             | 0           | -0.463076               | 3.695113  | -0.833003 |
| 16            | 1             | 0           | -0.463076               | 3.695113  | 0.833003  |
| 17            | 1             | 0           | 0.961606                | 3.691110  | 0.000000  |

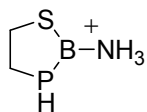

12

E = -899.9331582 a.u.

| Center Number | Atomic Number | Atomic Type | Coordinates (Angstroms) |           |           |
|---------------|---------------|-------------|-------------------------|-----------|-----------|
|               |               |             | X                       | Y         | Z         |
| 1             | 5             | 0           | 0.880086                | 0.074591  | 0.012863  |
| 2             | 6             | 0           | -1.717855               | 0.499802  | 0.386706  |
| 3             | 1             | 0           | -2.664500               | 0.934194  | 0.061887  |
| 4             | 1             | 0           | -1.708648               | 0.454059  | 1.475942  |
| 5             | 6             | 0           | -1.572401               | -0.896496 | -0.213385 |
| 6             | 1             | 0           | -2.232867               | -1.621022 | 0.260367  |
| 7             | 1             | 0           | -1.755726               | -0.901762 | -1.288468 |
| 8             | 7             | 0           | 2.438156                | 0.181518  | 0.069585  |
| 9             | 1             | 0           | 2.899914                | -0.709309 | 0.277246  |
| 10            | 1             | 0           | 2.801110                | 0.509783  | -0.832424 |
| 11            | 1             | 0           | 2.745811                | 0.863185  | 0.770125  |
| 12            | 15            | 0           | -0.291476               | 1.546494  | -0.237715 |
| 13            | 1             | 0           | 0.061759                | 2.277567  | 0.921811  |
| 14            | 16            | 0           | 0.156206                | -1.516720 | 0.020494  |

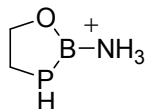

**13**

E = -576.9852181 a.u.

| Center Number | Atomic Number | Atomic Type | Coordinates (Angstroms) |           |           |
|---------------|---------------|-------------|-------------------------|-----------|-----------|
|               |               |             | X                       | Y         | Z         |
| 1             | 5             | 0           | 0.809960                | -0.055339 | 0.002716  |
| 2             | 6             | 0           | -1.705705               | 0.004190  | 0.301596  |
| 3             | 1             | 0           | -2.667403               | 0.179318  | -0.179122 |
| 4             | 1             | 0           | -1.849892               | 0.019811  | 1.381540  |
| 5             | 6             | 0           | -1.119751               | -1.334361 | -0.155215 |
| 6             | 1             | 0           | -1.467424               | -2.177697 | 0.437204  |
| 7             | 1             | 0           | -1.312248               | -1.529765 | -1.210515 |
| 8             | 7             | 0           | 2.368713                | -0.006192 | 0.076309  |
| 9             | 1             | 0           | 2.746489                | -0.950068 | 0.214956  |
| 10            | 1             | 0           | 2.768141                | 0.368997  | -0.790360 |
| 11            | 1             | 0           | 2.707378                | 0.591737  | 0.835657  |
| 12            | 15            | 0           | -0.469470               | 1.342604  | -0.209068 |
| 13            | 1             | 0           | -0.219249               | 1.942783  | 1.047825  |
| 14            | 8             | 0           | 0.332276                | -1.285389 | -0.003400 |

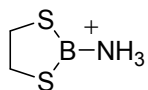

**14**

E = -956.2086756 a.u.

| Center Number | Atomic Number | Atomic Type | Coordinates (Angstroms) |           |           |
|---------------|---------------|-------------|-------------------------|-----------|-----------|
|               |               |             | X                       | Y         | Z         |
| 1             | 5             | 0           | -0.842181               | 0.006047  | -0.012208 |
| 2             | 6             | 0           | 1.653180                | 0.695679  | -0.279104 |
| 3             | 1             | 0           | 2.441055                | 1.296809  | 0.173478  |
| 4             | 1             | 0           | 1.774577                | 0.694321  | -1.362196 |
| 5             | 6             | 0           | 1.641386                | -0.711424 | 0.292839  |
| 6             | 1             | 0           | 2.429229                | -1.321149 | -0.148262 |
| 7             | 1             | 0           | 1.747873                | -0.710869 | 1.377498  |
| 8             | 7             | 0           | -2.401790               | 0.008341  | 0.005991  |
| 9             | 1             | 0           | -2.795132               | 0.877611  | -0.367152 |
| 10            | 1             | 0           | -2.792734               | -0.769017 | -0.535724 |
| 11            | 1             | 0           | -2.748838               | -0.096927 | 0.965882  |
| 12            | 16            | 0           | 0.044928                | 1.529775  | 0.074987  |
| 13            | 16            | 0           | 0.030073                | -1.527583 | -0.085414 |



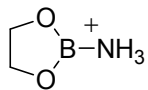

15

E = -310.3098535 a.u.

| Center<br>Number | Atomic<br>Number | Atomic<br>Type | Coordinates (Angstroms) |           |           |
|------------------|------------------|----------------|-------------------------|-----------|-----------|
|                  |                  |                | X                       | Y         | Z         |
| 1                | 5                | 0              | -0.620284               | 0.000260  | -0.003449 |
| 2                | 8                | 0              | 0.045672                | 1.148910  | 0.015117  |
| 3                | 8                | 0              | 0.045249                | -1.148748 | -0.022646 |
| 4                | 6                | 0              | 1.455061                | -0.777276 | 0.023165  |
| 5                | 1                | 0              | 1.947154                | -1.228449 | -0.835212 |
| 6                | 1                | 0              | 1.871951                | -1.179135 | 0.944162  |
| 7                | 6                | 0              | 1.455621                | 0.776838  | -0.018295 |
| 8                | 1                | 0              | 1.940860                | 1.227478  | 0.844258  |
| 9                | 1                | 0              | 1.879978                | 1.178883  | -0.935788 |
| 10               | 7                | 0              | -2.161695               | 0.000987  | 0.000275  |
| 11               | 1                | 0              | -2.534927               | 0.883561  | -0.363359 |
| 12               | 1                | 0              | -2.535034               | -0.772894 | -0.559099 |
| 13               | 1                | 0              | -2.528150               | -0.116326 | 0.951371  |

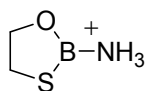

16

E = -633.2602732 a.u.

| Center<br>Number | Atomic<br>Number | Atomic<br>Type | Coordinates (Angstroms) |           |           |
|------------------|------------------|----------------|-------------------------|-----------|-----------|
|                  |                  |                | X                       | Y         | Z         |
| 1                | 5                | 0              | 0.758640                | 0.114617  | -0.007630 |
| 2                | 6                | 0              | -1.699343               | -0.180462 | -0.225198 |
| 3                | 1                | 0              | -2.545330               | -0.510123 | 0.374108  |
| 4                | 1                | 0              | -1.947001               | -0.259854 | -1.282280 |
| 5                | 6                | 0              | -1.239294               | 1.224975  | 0.166452  |
| 6                | 1                | 0              | -1.712712               | 1.996783  | -0.436579 |
| 7                | 1                | 0              | -1.408314               | 1.425908  | 1.224830  |
| 8                | 7                | 0              | 2.310898                | 0.111818  | -0.045989 |
| 9                | 1                | 0              | 2.677623                | -0.464270 | -0.810003 |
| 10               | 1                | 0              | 2.658187                | 1.069163  | -0.169508 |
| 11               | 1                | 0              | 2.711486                | -0.257092 | 0.822739  |
| 12               | 16               | 0              | -0.270043               | -1.321499 | 0.088377  |
| 13               | 8                | 0              | 0.193635                | 1.315072  | -0.053099 |

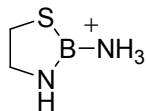

17

E = -613.3875825 a.u.

| Center Number | Atomic Number | Atomic Type | Coordinates (Angstroms) |           |           |
|---------------|---------------|-------------|-------------------------|-----------|-----------|
|               |               |             | X                       | Y         | Z         |
| 1             | 5             | 0           | -0.779158               | 0.178519  | 0.013368  |
| 2             | 6             | 0           | 1.685346                | -0.301975 | 0.239565  |
| 3             | 1             | 0           | 2.515880                | -0.724950 | -0.320414 |
| 4             | 1             | 0           | 1.887124                | -0.381575 | 1.306649  |
| 5             | 6             | 0           | 1.384608                | 1.139756  | -0.175467 |
| 6             | 1             | 0           | 1.971895                | 1.839527  | 0.419357  |
| 7             | 1             | 0           | 1.607865                | 1.298280  | -1.233514 |
| 8             | 7             | 0           | -2.335901               | 0.156499  | 0.044626  |
| 9             | 1             | 0           | -2.753506               | 1.080904  | 0.178343  |
| 10            | 1             | 0           | -2.709576               | -0.225785 | -0.830363 |
| 11            | 1             | 0           | -2.675979               | -0.450820 | 0.797040  |
| 12            | 16            | 0           | 0.174563                | -1.325244 | -0.094444 |
| 13            | 7             | 0           | -0.058669               | 1.350312  | 0.051679  |
| 14            | 1             | 0           | -0.398652               | 2.301366  | 0.068437  |

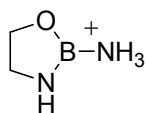

18

E = -290.436977 a.u.

| Center Number | Atomic Number | Atomic Type | Coordinates (Angstroms) |           |           |
|---------------|---------------|-------------|-------------------------|-----------|-----------|
|               |               |             | X                       | Y         | Z         |
| 1             | 6             | 0           | 1.551584                | 0.692279  | 0.056442  |
| 2             | 6             | 0           | 1.402352                | -0.849947 | -0.049785 |
| 3             | 1             | 0           | 2.160912                | 1.093477  | -0.752743 |
| 4             | 1             | 0           | 1.983357                | 0.996063  | 1.010993  |
| 5             | 1             | 0           | 1.901018                | -1.379692 | 0.758008  |
| 6             | 1             | 0           | 1.748995                | -1.233945 | -1.007777 |
| 7             | 8             | 0           | -0.022395               | -1.133201 | 0.039155  |
| 8             | 7             | 0           | 0.153411                | 1.164351  | -0.047768 |
| 9             | 1             | 0           | -0.045998               | 2.151440  | -0.055397 |
| 10            | 5             | 0           | -0.650958               | 0.049072  | -0.006033 |
| 11            | 7             | 0           | -2.199642               | 0.006977  | 0.003219  |
| 12            | 1             | 0           | -2.515343               | -0.900036 | -0.356319 |
| 13            | 1             | 0           | -2.569784               | 0.096609  | 0.954740  |
| 14            | 1             | 0           | -2.629216               | 0.743044  | -0.562681 |

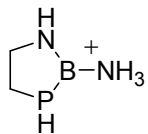

19

E = -557.11482 a.u.

| Center<br>Number | Atomic<br>Number | Atomic<br>Type | Coordinates (Angstroms) |           |           |
|------------------|------------------|----------------|-------------------------|-----------|-----------|
|                  |                  |                | X                       | Y         | Z         |
| 1                | 5                | 0              | -0.833703               | 0.120484  | 0.016585  |
| 2                | 6                | 0              | 1.714118                | -0.140101 | 0.296265  |
| 3                | 1                | 0              | 2.658912                | -0.413963 | -0.169996 |
| 4                | 1                | 0              | 1.839223                | -0.172312 | 1.378349  |
| 5                | 6                | 0              | 1.277479                | 1.261835  | -0.150148 |
| 6                | 1                | 0              | 1.748911                | 2.038552  | 0.452503  |
| 7                | 1                | 0              | 1.530450                | 1.438181  | -1.198460 |
| 8                | 7                | 0              | -2.395407               | 0.062664  | 0.071458  |
| 9                | 1                | 0              | -2.714614               | -0.530944 | 0.842850  |
| 10               | 1                | 0              | -2.841906               | 0.977148  | 0.182142  |
| 11               | 1                | 0              | -2.765033               | -0.360029 | -0.786363 |
| 12               | 7                | 0              | -0.193467               | 1.330898  | 0.003053  |
| 13               | 1                | 0              | -0.607185               | 2.254858  | -0.015104 |
| 14               | 15               | 0              | 0.359207                | -1.356652 | -0.213584 |
| 15               | 1                | 0              | 0.104178                | -1.969461 | 1.036628  |

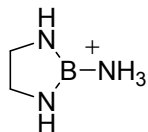

20

E = -270.5601548 a.u.

| Center<br>Number | Atomic<br>Number | Atomic<br>Type | Coordinates (Angstroms) |           |           |
|------------------|------------------|----------------|-------------------------|-----------|-----------|
|                  |                  |                | X                       | Y         | Z         |
| 1                | 5                | 0              | -0.679999               | 0.002445  | -0.008538 |
| 2                | 6                | 0              | 1.501339                | -0.769819 | 0.101114  |
| 3                | 1                | 0              | 2.146062                | -1.266624 | -0.622348 |
| 4                | 1                | 0              | 1.825562                | -1.040103 | 1.108455  |
| 5                | 6                | 0              | 1.505597                | 0.766291  | -0.093652 |
| 6                | 1                | 0              | 2.142687                | 1.260413  | 0.638335  |
| 7                | 1                | 0              | 1.843734                | 1.035866  | -1.096545 |
| 8                | 7                | 0              | -2.235976               | 0.001016  | 0.003730  |
| 9                | 1                | 0              | -2.623388               | 0.857288  | -0.400447 |
| 10               | 1                | 0              | -2.616146               | -0.787644 | -0.526094 |
| 11               | 1                | 0              | -2.597976               | -0.073022 | 0.959203  |
| 12               | 7                | 0              | 0.088668                | 1.154939  | 0.078961  |
| 13               | 7                | 0              | 0.085573                | -1.153144 | -0.090972 |
| 14               | 1                | 0              | -0.161236               | 2.129524  | 0.049333  |
| 15               | 1                | 0              | -0.168770               | -2.126436 | -0.054011 |

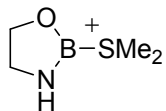

**21**

E = -711.8501378 a.u.

| Center<br>Number | Atomic<br>Number | Atomic<br>Type | Coordinates (Angstroms) |           |           |
|------------------|------------------|----------------|-------------------------|-----------|-----------|
|                  |                  |                | X                       | Y         | Z         |
| 1                | 6                | 0              | 2.673884                | 0.440897  | -0.061647 |
| 2                | 6                | 0              | 2.215190                | -1.007476 | 0.252957  |
| 3                | 1                | 0              | 3.371023                | 0.467966  | -0.898739 |
| 4                | 1                | 0              | 3.137826                | 0.920412  | 0.801821  |
| 5                | 1                | 0              | 2.603375                | -1.380284 | 1.197628  |
| 6                | 1                | 0              | 2.469078                | -1.702058 | -0.546740 |
| 7                | 7                | 0              | 1.404607                | 1.113916  | -0.402020 |
| 8                | 1                | 0              | 1.395444                | 2.070414  | -0.717682 |
| 9                | 8                | 0              | 0.760990                | -0.969351 | 0.346149  |
| 10               | 5                | 0              | 0.382662                | 0.246351  | -0.094625 |
| 11               | 6                | 0              | -1.979905               | 0.120879  | 1.462277  |
| 12               | 1                | 0              | -1.519370               | -0.833044 | 1.712543  |
| 13               | 1                | 0              | -1.646090               | 0.909112  | 2.134802  |
| 14               | 1                | 0              | -3.066780               | 0.060708  | 1.471770  |
| 15               | 6                | 0              | -1.996864               | -0.879048 | -1.157487 |
| 16               | 1                | 0              | -3.083778               | -0.923553 | -1.116284 |
| 17               | 1                | 0              | -1.669955               | -0.742946 | -2.186900 |
| 18               | 1                | 0              | -1.537401               | -1.758777 | -0.711128 |
| 19               | 16               | 0              | -1.485043               | 0.599136  | -0.224976 |

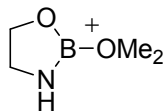

**22**

E = -388.877197 a.u.

| Center<br>Number | Atomic<br>Number | Atomic<br>Type | Coordinates (Angstroms) |           |           |
|------------------|------------------|----------------|-------------------------|-----------|-----------|
|                  |                  |                | X                       | Y         | Z         |
| 1                | 6                | 0              | -2.275398               | 0.705417  | -0.041276 |
| 2                | 6                | 0              | -2.137820               | -0.831520 | 0.096028  |
| 3                | 1                | 0              | -2.885968               | 1.124650  | 0.757753  |
| 4                | 1                | 0              | -2.702530               | 0.991655  | -1.003882 |
| 5                | 1                | 0              | -2.708362               | -1.377249 | -0.651118 |
| 6                | 1                | 0              | -2.407865               | -1.179965 | 1.092222  |
| 7                | 7                | 0              | -0.873880               | 1.164363  | 0.057760  |
| 8                | 1                | 0              | -0.672495               | 2.149194  | 0.090795  |
| 9                | 8                | 0              | -0.729570               | -1.134155 | -0.101116 |
| 10               | 5                | 0              | -0.079544               | 0.039551  | -0.054312 |
| 11               | 6                | 0              | 2.095088                | -1.260009 | 0.064539  |
| 12               | 1                | 0              | 2.496046                | -1.256545 | 1.076374  |
| 13               | 1                | 0              | 1.368880                | -2.053296 | -0.081528 |
| 14               | 1                | 0              | 2.877953                | -1.285066 | -0.689148 |
| 15               | 6                | 0              | 2.157763                | 1.227656  | 0.036556  |
| 16               | 1                | 0              | 3.109476                | 1.054630  | -0.459399 |
| 17               | 1                | 0              | 1.614265                | 2.027214  | -0.458544 |
| 18               | 1                | 0              | 2.285256                | 1.413722  | 1.101592  |
| 19               | 8                | 0              | 1.367373                | 0.008341  | -0.129254 |

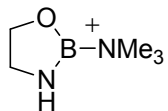

23

E = -408.3454785 a.u.

| Center<br>Number | Atomic<br>Number | Atomic<br>Type | Coordinates (Angstroms) |           |           |
|------------------|------------------|----------------|-------------------------|-----------|-----------|
|                  |                  |                | X                       | Y         | Z         |
| 1                | 6                | 0              | -2.479343               | -0.713151 | 0.064581  |
| 2                | 6                | 0              | -2.338613               | 0.825182  | -0.066128 |
| 3                | 1                | 0              | -3.099249               | -1.128360 | -0.729684 |
| 4                | 1                | 0              | -2.898888               | -1.004722 | 1.029063  |
| 5                | 1                | 0              | -2.869365               | 1.365692  | 0.714051  |
| 6                | 1                | 0              | -2.663324               | 1.184661  | -1.042055 |
| 7                | 7                | 0              | -1.081848               | -1.173241 | -0.049009 |
| 8                | 1                | 0              | -0.876676               | -2.158631 | -0.051712 |
| 9                | 8                | 0              | -0.924048               | 1.118572  | 0.059413  |
| 10               | 5                | 0              | -0.265721               | -0.058516 | 0.005631  |
| 11               | 7                | 0              | 1.268858                | -0.016358 | 0.001151  |
| 12               | 6                | 0              | 1.864176                | -1.385486 | 0.012350  |
| 13               | 1                | 0              | 1.534488                | -1.924939 | -0.874807 |
| 14               | 1                | 0              | 2.950258                | -1.294718 | 0.004586  |
| 15               | 1                | 0              | 1.544766                | -1.906574 | 0.913967  |
| 16               | 6                | 0              | 1.722932                | 0.744670  | 1.214512  |
| 17               | 1                | 0              | 2.810802                | 0.810745  | 1.192852  |
| 18               | 1                | 0              | 1.276460                | 1.736577  | 1.189746  |
| 19               | 1                | 0              | 1.398326                | 0.211161  | 2.107625  |
| 20               | 6                | 0              | 1.709054                | 0.716396  | -1.234687 |
| 21               | 1                | 0              | 2.797104                | 0.783172  | -1.227804 |
| 22               | 1                | 0              | 1.374243                | 0.162230  | -2.111422 |
| 23               | 1                | 0              | 1.263740                | 1.709234  | -1.226634 |

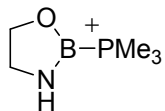

24

E = -694.9474197 a.u.

| Center Number | Atomic Number | Atomic Type | Coordinates (Angstroms) |           |           |
|---------------|---------------|-------------|-------------------------|-----------|-----------|
|               |               |             | X                       | Y         | Z         |
| 1             | 6             | 0           | -2.881644               | -0.701965 | 0.059669  |
| 2             | 6             | 0           | -2.714171               | 0.833036  | -0.064547 |
| 3             | 1             | 0           | -3.506430               | -1.104391 | -0.737628 |
| 4             | 1             | 0           | -3.308080               | -0.990999 | 1.022106  |
| 5             | 1             | 0           | -3.228698               | 1.379229  | 0.722821  |
| 6             | 1             | 0           | -3.039970               | 1.204169  | -1.035829 |
| 7             | 7             | 0           | -1.491728               | -1.185754 | -0.052730 |
| 8             | 1             | 0           | -1.300005               | -2.173881 | -0.058275 |
| 9             | 8             | 0           | -1.292223               | 1.102481  | 0.051451  |
| 10            | 5             | 0           | -0.649196               | -0.088721 | -0.001996 |
| 11            | 15            | 0           | 1.288401                | -0.019049 | 0.001255  |
| 12            | 6             | 0           | 1.821937                | 1.014681  | 1.388243  |
| 13            | 1             | 0           | 2.907024                | 1.128086  | 1.369766  |
| 14            | 1             | 0           | 1.346725                | 1.992912  | 1.298757  |
| 15            | 1             | 0           | 1.518844                | 0.555946  | 2.330264  |
| 16            | 6             | 0           | 2.043004                | -1.657837 | 0.152016  |
| 17            | 1             | 0           | 1.745752                | -2.281111 | -0.692800 |
| 18            | 1             | 0           | 3.129992                | -1.560941 | 0.157080  |
| 19            | 1             | 0           | 1.721077                | -2.129044 | 1.081870  |
| 20            | 6             | 0           | 1.862205                | 0.754041  | -1.532988 |
| 21            | 1             | 0           | 2.947719                | 0.863213  | -1.505904 |
| 22            | 1             | 0           | 1.579772                | 0.138056  | -2.387664 |
| 23            | 1             | 0           | 1.398141                | 1.736779  | -1.630261 |



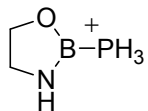

**25**

E = -576.9710838 a.u.

| Center<br>Number | Atomic<br>Number | Atomic<br>Type | Coordinates (Angstroms) |           |           |
|------------------|------------------|----------------|-------------------------|-----------|-----------|
|                  |                  |                | X                       | Y         | Z         |
| 1                | 6                | 0              | 2.024297                | 0.678806  | 0.057404  |
| 2                | 6                | 0              | 1.856003                | -0.858593 | -0.058114 |
| 3                | 1                | 0              | 2.639146                | 1.078485  | -0.748509 |
| 4                | 1                | 0              | 2.456046                | 0.973893  | 1.014966  |
| 5                | 1                | 0              | 2.358415                | -1.401485 | 0.738652  |
| 6                | 1                | 0              | 2.183301                | -1.239549 | -1.024364 |
| 7                | 7                | 0              | 0.631854                | 1.169206  | -0.045951 |
| 8                | 1                | 0              | 0.442028                | 2.158127  | -0.058591 |
| 9                | 8                | 0              | 0.427215                | -1.126225 | 0.049460  |
| 10               | 5                | 0              | -0.190848               | 0.066236  | -0.000025 |
| 11               | 15               | 0              | -2.145762               | 0.006619  | 0.000256  |
| 12               | 1                | 0              | -2.647355               | -0.666043 | -1.118051 |
| 13               | 1                | 0              | -2.639788               | -0.684756 | 1.110497  |
| 14               | 1                | 0              | -2.773623               | 1.254947  | 0.011926  |

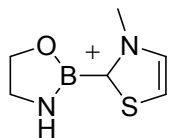

26

E = -842.2141202 a.u.

| Center<br>Number | Atomic<br>Number | Atomic<br>Type | Coordinates (Angstroms) |           |           |
|------------------|------------------|----------------|-------------------------|-----------|-----------|
|                  |                  |                | X                       | Y         | Z         |
| 1                | 6                | 0              | -3.224492               | -0.799631 | -0.187739 |
| 2                | 6                | 0              | -3.109053               | 0.678392  | 0.244582  |
| 3                | 1                | 0              | -3.614580               | -0.899535 | -1.203144 |
| 4                | 1                | 0              | -3.860426               | -1.367741 | 0.491312  |
| 5                | 1                | 0              | -3.389212               | 0.819334  | 1.288960  |
| 6                | 1                | 0              | -3.690219               | 1.352185  | -0.380962 |
| 7                | 7                | 0              | -1.824855               | -1.250869 | -0.125879 |
| 8                | 1                | 0              | -1.605599               | -2.215573 | -0.312740 |
| 9                | 8                | 0              | -1.708165               | 1.029196  | 0.120822  |
| 10               | 5                | 0              | -1.009452               | -0.131344 | -0.012947 |
| 11               | 6                | 0              | 0.572580                | -0.120367 | -0.014069 |
| 12               | 16               | 0              | 1.508989                | -1.532108 | 0.079336  |
| 13               | 6                | 0              | 2.704276                | 0.686791  | -0.027055 |
| 14               | 6                | 0              | 2.968950                | -0.637017 | 0.049987  |
| 15               | 1                | 0              | 3.412926                | 1.500206  | -0.063382 |
| 16               | 1                | 0              | 3.933265                | -1.118959 | 0.091652  |
| 17               | 7                | 0              | 1.352971                | 0.957108  | -0.061948 |
| 18               | 6                | 0              | 0.841318                | 2.343578  | -0.124487 |
| 19               | 1                | 0              | 0.427049                | 2.614467  | 0.844794  |
| 20               | 1                | 0              | 1.673759                | 2.993735  | -0.380026 |
| 21               | 1                | 0              | 0.063524                | 2.404611  | -0.880202 |

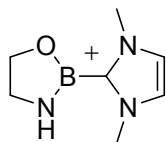

27

E = -538.7032982 a.u.

| Center<br>Number | Atomic<br>Number | Atomic<br>Type | Coordinates (Angstroms) |           |           |
|------------------|------------------|----------------|-------------------------|-----------|-----------|
|                  |                  |                | X                       | Y         | Z         |
| 1                | 6                | 0              | 3.143739                | 0.702771  | -0.231897 |
| 2                | 6                | 0              | 3.014582                | -0.752074 | 0.262118  |
| 3                | 1                | 0              | 3.503829                | 0.753351  | -1.262271 |
| 4                | 1                | 0              | 3.810057                | 1.285830  | 0.403917  |
| 5                | 1                | 0              | 3.295812                | -0.849446 | 1.311546  |
| 6                | 1                | 0              | 3.588682                | -1.458121 | -0.333844 |
| 7                | 7                | 0              | 1.753801                | 1.181587  | -0.146744 |
| 8                | 1                | 0              | 1.551006                | 2.133281  | -0.400003 |
| 9                | 8                | 0              | 1.611934                | -1.088564 | 0.153801  |
| 10               | 5                | 0              | 0.917484                | 0.073754  | -0.003704 |
| 11               | 6                | 0              | -2.730913               | -0.767951 | -0.037322 |
| 12               | 6                | 0              | -2.805610               | 0.588237  | 0.029918  |
| 13               | 1                | 0              | -3.506674               | -1.514068 | -0.072412 |
| 14               | 1                | 0              | -3.656775               | 1.246892  | 0.067109  |
| 15               | 6                | 0              | -0.656562               | 0.022035  | -0.005857 |
| 16               | 7                | 0              | -1.517351               | 1.055032  | 0.048944  |
| 17               | 7                | 0              | -1.401029               | -1.096983 | -0.056010 |
| 18               | 6                | 0              | -1.145196               | 2.469805  | 0.113671  |
| 19               | 1                | 0              | -0.785480               | 2.803527  | -0.859700 |
| 20               | 1                | 0              | -2.028477               | 3.042787  | 0.385310  |
| 21               | 1                | 0              | -0.381639               | 2.608175  | 0.877373  |
| 22               | 6                | 0              | -0.888749               | -2.474741 | -0.110428 |
| 23               | 1                | 0              | -0.356947               | -2.702207 | 0.810368  |
| 24               | 1                | 0              | -1.741420               | -3.138448 | -0.230161 |
| 25               | 1                | 0              | -0.210561               | -2.577751 | -0.953672 |

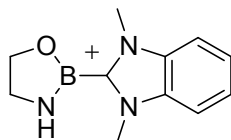

**28**

E = -692.3270179 a.u.

| Center<br>Number | Atomic<br>Number | Atomic<br>Type | Coordinates (Angstroms) |           |           |
|------------------|------------------|----------------|-------------------------|-----------|-----------|
|                  |                  |                | X                       | Y         | Z         |
| 1                | 6                | 0              | 4.065211                | -0.732737 | 0.065412  |
| 2                | 6                | 0              | 4.083858                | 0.672322  | -0.039428 |
| 3                | 6                | 0              | 2.919513                | 1.415371  | -0.098330 |
| 4                | 6                | 0              | 1.724935                | 0.696671  | -0.047622 |
| 5                | 6                | 0              | 1.706619                | -0.693499 | 0.054954  |
| 6                | 6                | 0              | 2.881019                | -1.444000 | 0.114965  |
| 7                | 1                | 0              | 5.005584                | -1.267408 | 0.108143  |
| 8                | 1                | 0              | 5.038098                | 1.182574  | -0.073318 |
| 9                | 1                | 0              | 2.938962                | 2.495116  | -0.172786 |
| 10               | 1                | 0              | 2.868275                | -2.523447 | 0.195421  |
| 11               | 7                | 0              | 0.398917                | 1.102808  | -0.084809 |
| 12               | 7                | 0              | 0.372505                | -1.071117 | 0.073364  |
| 13               | 6                | 0              | -0.400214               | 0.023634  | -0.004629 |
| 14               | 6                | 0              | -0.060679               | -2.465845 | 0.176714  |
| 15               | 1                | 0              | -1.143342               | -2.511849 | 0.112475  |
| 16               | 1                | 0              | 0.375842                | -3.026978 | -0.649416 |
| 17               | 1                | 0              | 0.284822                | -2.874376 | 1.126511  |
| 18               | 6                | 0              | -0.012429               | 2.497669  | -0.224087 |
| 19               | 1                | 0              | -1.044746               | 2.537157  | -0.562481 |
| 20               | 1                | 0              | 0.095884                | 3.015506  | 0.729861  |
| 21               | 1                | 0              | 0.622965                | 2.971765  | -0.971218 |
| 22               | 5                | 0              | -1.984085               | 0.034825  | 0.006463  |
| 23               | 7                | 0              | -2.819245               | 1.029196  | 0.516791  |
| 24               | 8                | 0              | -2.679817               | -1.011735 | -0.518620 |
| 25               | 6                | 0              | -4.083147               | -0.661410 | -0.496804 |
| 26               | 1                | 0              | -4.654466               | -1.529503 | -0.175419 |
| 27               | 1                | 0              | -4.369987               | -0.395149 | -1.514938 |
| 28               | 6                | 0              | -4.206588               | 0.537670  | 0.463902  |
| 29               | 1                | 0              | -4.542824               | 0.232233  | 1.457654  |
| 30               | 1                | 0              | -4.889787               | 1.293719  | 0.076995  |
| 31               | 1                | 0              | -2.600148               | 1.819111  | 1.101456  |

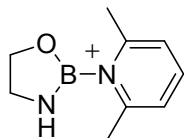

**29**

E = -560.7780695 a.u.

| Center<br>Number | Atomic<br>Number | Atomic<br>Type | Coordinates (Angstroms) |           |           |
|------------------|------------------|----------------|-------------------------|-----------|-----------|
|                  |                  |                | X                       | Y         | Z         |
| 1                | 6                | 0              | -3.201650               | 0.134268  | 0.683389  |
| 2                | 6                | 0              | -3.057391               | -0.140874 | -0.834142 |
| 3                | 1                | 0              | -3.843878               | -0.602934 | 1.165161  |
| 4                | 1                | 0              | -3.601549               | 1.131286  | 0.880777  |
| 5                | 1                | 0              | -3.602671               | 0.571397  | -1.449135 |
| 6                | 1                | 0              | -3.366679               | -1.153434 | -1.095088 |
| 7                | 7                | 0              | -1.808975               | 0.030157  | 1.150944  |
| 8                | 1                | 0              | -1.589464               | 0.102941  | 2.130746  |
| 9                | 8                | 0              | -1.646281               | -0.023812 | -1.139786 |
| 10               | 5                | 0              | -0.984382               | 0.004852  | 0.037669  |
| 11               | 7                | 0              | 0.536520                | 0.002732  | 0.037852  |
| 12               | 6                | 0              | 1.184864                | -1.193269 | 0.033918  |
| 13               | 6                | 0              | 1.192915                | 1.193478  | -0.004633 |
| 14               | 6                | 0              | 2.576635                | 1.197090  | -0.023858 |
| 15               | 1                | 0              | 3.099664                | 2.143321  | -0.056662 |
| 16               | 6                | 0              | 2.568575                | -1.206746 | 0.015109  |
| 17               | 1                | 0              | 3.085283                | -2.156989 | 0.014100  |
| 18               | 6                | 0              | 3.267433                | -0.007289 | -0.010115 |
| 19               | 1                | 0              | 4.350992                | -0.011203 | -0.026462 |
| 20               | 6                | 0              | 0.372089                | 2.445235  | -0.045483 |
| 21               | 1                | 0              | -0.277355               | 2.443613  | -0.925044 |
| 22               | 1                | 0              | -0.257792               | 2.527241  | 0.843726  |
| 23               | 1                | 0              | 1.020219                | 3.317489  | -0.092761 |
| 24               | 6                | 0              | 0.355517                | -2.440073 | 0.037614  |
| 25               | 1                | 0              | -0.267155               | -2.490411 | 0.934141  |
| 26               | 1                | 0              | -0.301556               | -2.459436 | -0.836163 |
| 27               | 1                | 0              | 0.997366                | -3.317784 | 0.010243  |

#### 4-NH<sub>3</sub> complex

E = -138.9623591 a.u.

| Center<br>Number | Atomic<br>Number | Atomic<br>Type | Coordinates (Angstroms) |           |           |
|------------------|------------------|----------------|-------------------------|-----------|-----------|
|                  |                  |                | X                       | Y         | Z         |
| 1                | 5                | 0              | 0.000000                | 0.000000  | 0.691857  |
| 2                | 1                | 0              | -1.014971               | 0.000000  | 1.314694  |
| 3                | 1                | 0              | 1.014971                | 0.000000  | 1.314694  |
| 4                | 7                | 0              | 0.000000                | 1.309833  | -0.249280 |
| 5                | 1                | 0              | 0.000000                | 2.115837  | 0.380614  |
| 6                | 1                | 0              | 0.826447                | 1.414601  | -0.839998 |
| 7                | 1                | 0              | -0.826447               | 1.414601  | -0.839998 |
| 8                | 7                | 0              | 0.000000                | -1.309833 | -0.249280 |
| 9                | 1                | 0              | 0.826447                | -1.414601 | -0.839998 |
| 10               | 1                | 0              | -0.826447               | -1.414601 | -0.839998 |
| 11               | 1                | 0              | 0.000000                | -2.115837 | 0.380614  |

#### 5-NH<sub>3</sub> complex

E = -337.5834906 a.u.

| Center<br>Number | Atomic<br>Number | Atomic<br>Type | Coordinates (Angstroms) |           |           |
|------------------|------------------|----------------|-------------------------|-----------|-----------|
|                  |                  |                | X                       | Y         | Z         |
| 1                | 5                | 0              | 0.000000                | 0.000000  | 0.162248  |
| 2                | 7                | 0              | 0.000000                | 1.332228  | -0.755555 |
| 3                | 1                | 0              | 0.000000                | 2.115781  | -0.093424 |
| 4                | 1                | 0              | 0.832145                | 1.448117  | -1.337601 |
| 5                | 9                | 0              | -1.163878               | 0.000000  | 0.850210  |
| 6                | 9                | 0              | 1.163878                | 0.000000  | 0.850210  |
| 7                | 1                | 0              | -0.832145               | 1.448117  | -1.337601 |
| 8                | 7                | 0              | 0.000000                | -1.332228 | -0.755555 |
| 9                | 1                | 0              | -0.832145               | -1.448117 | -1.337601 |
| 10               | 1                | 0              | 0.000000                | -2.115781 | -0.093424 |
| 11               | 1                | 0              | 0.832145                | -1.448117 | -1.337601 |

### 6-NH<sub>3</sub> complex

E = -1058.2536466 a.u.

| Center Number | Atomic Number | Atomic Type | Coordinates (Angstroms) |           |           |
|---------------|---------------|-------------|-------------------------|-----------|-----------|
|               |               |             | X                       | Y         | Z         |
| 1             | 5             | 0           | 0.000000                | 0.000000  | 0.202655  |
| 2             | 17            | 0           | 1.541939                | 0.000000  | -0.730879 |
| 3             | 17            | 0           | -1.541939               | 0.000000  | -0.730879 |
| 4             | 7             | 0           | 0.000000                | 1.307223  | 1.138396  |
| 5             | 1             | 0           | 0.000000                | 2.113058  | 0.503605  |
| 6             | 1             | 0           | -0.834837               | 1.402919  | 1.722962  |
| 7             | 1             | 0           | 0.834837                | 1.402919  | 1.722962  |
| 8             | 7             | 0           | 0.000000                | -1.307223 | 1.138396  |
| 9             | 1             | 0           | 0.000000                | -2.113058 | 0.503605  |
| 10            | 1             | 0           | -0.834837               | -1.402919 | 1.722962  |
| 11            | 1             | 0           | 0.834837                | -1.402919 | 1.722962  |

### 7-NH<sub>3</sub> complex

E = -217.6003603 a.u.

| Center Number | Atomic Number | Atomic Type | Coordinates (Angstroms) |           |           |
|---------------|---------------|-------------|-------------------------|-----------|-----------|
|               |               |             | X                       | Y         | Z         |
| 1             | 5             | 0           | 0.000000                | 0.000000  | 0.120450  |
| 2             | 7             | 0           | 0.000000                | 1.299670  | -0.880258 |
| 3             | 1             | 0           | 0.000000                | 2.124836  | -0.276361 |
| 4             | 1             | 0           | 0.828308                | 1.383368  | -1.472216 |
| 5             | 1             | 0           | -0.828308               | 1.383368  | -1.472216 |
| 6             | 7             | 0           | 0.000000                | -1.299670 | -0.880258 |
| 7             | 1             | 0           | -0.828308               | -1.383368 | -1.472216 |
| 8             | 1             | 0           | 0.828308                | -1.383368 | -1.472216 |
| 9             | 6             | 0           | -1.371055               | 0.000000  | 0.932170  |
| 10            | 1             | 0           | -1.440933               | -0.870883 | 1.591024  |
| 11            | 1             | 0           | -1.440933               | 0.870883  | 1.591024  |
| 12            | 1             | 0           | -2.272049               | 0.000000  | 0.306408  |
| 13            | 6             | 0           | 1.371055                | 0.000000  | 0.932170  |
| 14            | 1             | 0           | 1.440933                | -0.870883 | 1.591024  |
| 15            | 1             | 0           | 2.272049                | 0.000000  | 0.306408  |
| 16            | 1             | 0           | 1.440933                | 0.870883  | 1.591024  |
| 17            | 1             | 0           | 0.000000                | -2.124836 | -0.276361 |

### 8-NH<sub>3</sub> complex

E = -900.2601184 a.u.

| Center<br>Number | Atomic<br>Number | Atomic<br>Type | Coordinates (Angstroms) |           |           |
|------------------|------------------|----------------|-------------------------|-----------|-----------|
|                  |                  |                | X                       | Y         | Z         |
| 1                | 5                | 0              | 0.000000                | 0.000000  | 0.845324  |
| 2                | 6                | 0              | 0.000000                | 0.765420  | -1.888131 |
| 3                | 1                | 0              | 0.535476                | 1.151062  | -2.756486 |
| 4                | 1                | 0              | -1.021069               | 1.150807  | -1.929315 |
| 5                | 6                | 0              | 0.000000                | -0.765420 | -1.888131 |
| 6                | 1                | 0              | -0.535476               | -1.151062 | -2.756486 |
| 7                | 1                | 0              | 1.021069                | -1.150807 | -1.929315 |
| 8                | 7                | 0              | -1.127368               | 0.636783  | 1.820928  |
| 9                | 1                | 0              | -1.586906               | -0.036596 | 2.440348  |
| 10               | 1                | 0              | -0.816966               | 1.430750  | 2.385536  |
| 11               | 1                | 0              | -1.866157               | 0.990457  | 1.207606  |
| 12               | 15               | 0              | 0.873448                | 1.325410  | -0.325627 |
| 13               | 1                | 0              | 0.112214                | 2.475300  | 0.005692  |
| 14               | 7                | 0              | 1.127368                | -0.636783 | 1.820928  |
| 15               | 1                | 0              | 1.586906                | 0.036596  | 2.440348  |
| 16               | 1                | 0              | 0.816966                | -1.430750 | 2.385536  |
| 17               | 1                | 0              | 1.866157                | -0.990457 | 1.207606  |
| 18               | 15               | 0              | -0.873448               | -1.325410 | -0.325627 |
| 19               | 1                | 0              | -0.112214               | -2.475300 | 0.005692  |



### 9-NH<sub>3</sub> complex

E = -409.310618 a.u.

| Center<br>Number | Atomic<br>Number | Atomic<br>Type | Coordinates (Angstroms) |           |           |
|------------------|------------------|----------------|-------------------------|-----------|-----------|
|                  |                  |                | X                       | Y         | Z         |
| 1                | 5                | 0              | -0.698220               | -1.263672 | 0.000000  |
| 2                | 7                | 0              | -0.129221               | -2.077964 | 1.302663  |
| 3                | 1                | 0              | -0.477358               | -1.567219 | 2.117563  |
| 4                | 1                | 0              | -0.459714               | -3.039773 | 1.397998  |
| 5                | 1                | 0              | 0.888814                | -2.071606 | 1.387863  |
| 6                | 7                | 0              | -0.129221               | -2.077964 | -1.302663 |
| 7                | 1                | 0              | -0.477358               | -1.567219 | -2.117563 |
| 8                | 1                | 0              | 0.888814                | -2.071606 | -1.387863 |
| 9                | 1                | 0              | -0.459714               | -3.039773 | -1.397998 |
| 10               | 6                | 0              | 0.003172                | 0.167101  | 0.000000  |
| 11               | 6                | 0              | 1.402119                | 0.287620  | 0.000000  |
| 12               | 6                | 0              | -0.746951               | 1.347768  | 0.000000  |
| 13               | 6                | 0              | 2.029249                | 1.527907  | 0.000000  |
| 14               | 1                | 0              | 2.041412                | -0.598138 | 0.000000  |
| 15               | 6                | 0              | -0.129221               | 2.595300  | 0.000000  |
| 16               | 1                | 0              | -1.830704               | 1.297344  | 0.000000  |
| 17               | 6                | 0              | 1.257812                | 2.686737  | 0.000000  |
| 18               | 1                | 0              | 3.110590                | 1.593585  | 0.000000  |
| 19               | 1                | 0              | -0.730986               | 3.496269  | 0.000000  |
| 20               | 1                | 0              | 1.739230                | 3.657140  | 0.000000  |
| 21               | 6                | 0              | -2.287000               | -1.367776 | 0.000000  |
| 22               | 1                | 0              | -2.723798               | -0.874024 | -0.873246 |
| 23               | 1                | 0              | -2.660322               | -2.399035 | 0.000000  |
| 24               | 1                | 0              | -2.723798               | -0.874024 | 0.873246  |

# 10-NH<sub>3</sub> complex

E = -601.018362 a.u.

| Center<br>Number | Atomic<br>Number | Atomic<br>Type | Coordinates (Angstroms) |           |           |
|------------------|------------------|----------------|-------------------------|-----------|-----------|
|                  |                  |                | X                       | Y         | Z         |
| 1                | 5                | 0              | 0.021237                | 0.980172  | 0.072970  |
| 2                | 7                | 0              | 0.003190                | 1.821094  | 1.479459  |
| 3                | 1                | 0              | -0.076700               | 1.114304  | 2.214825  |
| 4                | 1                | 0              | 0.845875                | 2.358884  | 1.688925  |
| 5                | 1                | 0              | -0.813023               | 2.426872  | 1.582622  |
| 6                | 7                | 0              | 0.111839                | 2.103565  | -1.104487 |
| 7                | 1                | 0              | 0.059278                | 1.586352  | -1.986133 |
| 8                | 1                | 0              | -0.635744               | 2.799536  | -1.124663 |
| 9                | 1                | 0              | 1.013104                | 2.584439  | -1.114678 |
| 10               | 6                | 0              | 1.375692                | 0.139960  | 0.003246  |
| 11               | 6                | 0              | 1.389805                | -1.173721 | -0.480234 |
| 12               | 6                | 0              | 2.608653                | 0.715467  | 0.349538  |
| 13               | 6                | 0              | 2.580446                | -1.883969 | -0.604484 |
| 14               | 1                | 0              | 0.456596                | -1.650272 | -0.761352 |
| 15               | 6                | 0              | 3.802559                | 0.012121  | 0.233659  |
| 16               | 1                | 0              | 2.668328                | 1.740730  | 0.717930  |
| 17               | 6                | 0              | 3.786894                | -1.294305 | -0.244516 |
| 18               | 1                | 0              | 2.565314                | -2.900191 | -0.979750 |
| 19               | 1                | 0              | 4.739211                | 0.478635  | 0.514258  |
| 20               | 1                | 0              | 4.713207                | -1.848508 | -0.335693 |
| 21               | 6                | 0              | -1.377718               | 0.222281  | -0.002930 |
| 22               | 6                | 0              | -2.425302               | 0.584244  | -0.857133 |
| 23               | 6                | 0              | -1.606568               | -0.843959 | 0.881451  |
| 24               | 6                | 0              | -3.647292               | -0.085301 | -0.836819 |
| 25               | 1                | 0              | -2.315950               | 1.393479  | -1.575898 |
| 26               | 6                | 0              | -2.824163               | -1.511393 | 0.916139  |
| 27               | 1                | 0              | -0.806424               | -1.180651 | 1.537488  |
| 28               | 6                | 0              | -3.849171               | -1.131576 | 0.053581  |
| 29               | 1                | 0              | -4.437600               | 0.210784  | -1.516036 |
| 30               | 1                | 0              | -2.972150               | -2.332749 | 1.606915  |
| 31               | 1                | 0              | -4.797705               | -1.654207 | 0.072602  |

### 11-NH<sub>3</sub> complex

E = -519.3141097 a.u.

| Center<br>Number | Atomic<br>Number | Atomic<br>Type | Coordinates (Angstroms) |           |           |
|------------------|------------------|----------------|-------------------------|-----------|-----------|
|                  |                  |                | X                       | Y         | Z         |
| 1                | 6                | 0              | 0.000000                | 0.695464  | -0.526772 |
| 2                | 6                | 0              | 0.000000                | -0.695464 | -0.526772 |
| 3                | 6                | 0              | 0.000000                | -1.426004 | -1.692167 |
| 4                | 6                | 0              | 0.000000                | -0.695488 | -2.886139 |
| 5                | 6                | 0              | 0.000000                | 0.695488  | -2.886139 |
| 6                | 6                | 0              | 0.000000                | 1.426004  | -1.692167 |
| 7                | 1                | 0              | 0.000000                | -2.507973 | -1.679161 |
| 8                | 1                | 0              | 0.000000                | -1.228621 | -3.828157 |
| 9                | 1                | 0              | 0.000000                | 1.228621  | -3.828157 |
| 10               | 1                | 0              | 0.000000                | 2.507973  | -1.679161 |
| 11               | 8                | 0              | 0.000000                | -1.166477 | 0.782061  |
| 12               | 8                | 0              | 0.000000                | 1.166477  | 0.782061  |
| 13               | 5                | 0              | 0.000000                | 0.000000  | 1.578324  |
| 14               | 7                | 0              | 1.312802                | 0.000000  | 2.541000  |
| 15               | 1                | 0              | 1.413343                | 0.831820  | 3.125711  |
| 16               | 1                | 0              | 1.413343                | -0.831820 | 3.125711  |
| 17               | 7                | 0              | -1.312802               | 0.000000  | 2.541000  |
| 18               | 1                | 0              | -1.413343               | -0.831820 | 3.125711  |
| 19               | 1                | 0              | -1.413343               | 0.831820  | 3.125711  |
| 20               | 1                | 0              | 2.109157                | 0.000000  | 1.897071  |
| 21               | 1                | 0              | -2.109157               | 0.000000  | 1.897071  |

### 12-NH<sub>3</sub> complex

E = -956.5332267 a.u.

| Center<br>Number | Atomic<br>Number | Atomic<br>Type | Coordinates (Angstroms) |           |           |
|------------------|------------------|----------------|-------------------------|-----------|-----------|
|                  |                  |                | X                       | Y         | Z         |
| 1                | 5                | 0              | -0.810305               | 0.041083  | -0.008442 |
| 2                | 6                | 0              | 1.902176                | 0.579227  | -0.350139 |
| 3                | 1                | 0              | 2.826198                | 1.071461  | -0.040773 |
| 4                | 1                | 0              | 1.893375                | 0.522452  | -1.439763 |
| 5                | 6                | 0              | 1.826926                | -0.816451 | 0.253942  |
| 6                | 1                | 0              | 2.556816                | -1.491310 | -0.191962 |
| 7                | 1                | 0              | 1.992997                | -0.796684 | 1.331625  |
| 8                | 7                | 0              | -1.691251               | 0.155822  | -1.365902 |
| 9                | 1                | 0              | -2.290493               | -0.654535 | -1.547317 |
| 10               | 1                | 0              | -2.259436               | 1.001460  | -1.453289 |
| 11               | 1                | 0              | -1.013397               | 0.174017  | -2.131792 |
| 12               | 15               | 0              | 0.433013                | 1.540839  | 0.300832  |
| 13               | 1                | 0              | 0.120085                | 2.325246  | -0.839219 |
| 14               | 16               | 0              | 0.167580                | -1.552400 | -0.067507 |
| 15               | 7                | 0              | -1.885634               | -0.023045 | 1.210251  |
| 16               | 1                | 0              | -2.478716               | 0.803260  | 1.320517  |
| 17               | 1                | 0              | -2.482197               | -0.854061 | 1.203231  |
| 18               | 1                | 0              | -1.326604               | -0.086990 | 2.065329  |

### 13-NH<sub>3</sub> complex

E = -633.5809987 a.u.

| Center<br>Number | Atomic<br>Number | Atomic<br>Type | Coordinates (Angstroms) |           |           |
|------------------|------------------|----------------|-------------------------|-----------|-----------|
|                  |                  |                | X                       | Y         | Z         |
| 1                | 5                | 0              | 0.688836                | -0.046166 | 0.026238  |
| 2                | 6                | 0              | -1.933529               | 0.008204  | 0.270436  |
| 3                | 1                | 0              | -2.903921               | 0.139203  | -0.208027 |
| 4                | 1                | 0              | -2.072155               | 0.073828  | 1.350449  |
| 5                | 6                | 0              | -1.311877               | -1.333332 | -0.112280 |
| 6                | 1                | 0              | -1.751007               | -2.166638 | 0.434912  |
| 7                | 1                | 0              | -1.433773               | -1.526217 | -1.183929 |
| 8                | 7                | 0              | 1.620852                | 0.196996  | 1.336894  |
| 9                | 1                | 0              | 2.230203                | -0.602343 | 1.532586  |
| 10               | 1                | 0              | 2.181099                | 1.050084  | 1.349917  |
| 11               | 7                | 0              | 1.738332                | -0.159523 | -1.232352 |
| 12               | 1                | 0              | 2.299522                | 0.671147  | -1.427139 |
| 13               | 1                | 0              | 2.357912                | -0.970468 | -1.162088 |
| 14               | 1                | 0              | 0.972841                | 0.255171  | 2.125462  |
| 15               | 1                | 0              | 1.162779                | -0.310513 | -2.064446 |
| 16               | 15               | 0              | -0.711772               | 1.307498  | -0.335076 |
| 17               | 1                | 0              | -0.564295               | 2.067712  | 0.850622  |
| 18               | 8                | 0              | 0.088918                | -1.296768 | 0.201987  |

### 14-NH<sub>3</sub> complex

E = -1012.805259 a.u.

| Center<br>Number | Atomic<br>Number | Atomic<br>Type | Coordinates (Angstroms) |           |           |
|------------------|------------------|----------------|-------------------------|-----------|-----------|
|                  |                  |                | X                       | Y         | Z         |
| 1                | 5                | 0              | 0.000000                | 0.000000  | 0.778773  |
| 2                | 6                | 0              | -0.359257               | 0.667628  | -1.849037 |
| 3                | 1                | 0              | -0.006027               | 1.308475  | -2.657454 |
| 4                | 1                | 0              | -1.437022               | 0.538439  | -1.946399 |
| 5                | 6                | 0              | 0.359257                | -0.667628 | -1.849037 |
| 6                | 1                | 0              | 0.006027                | -1.308475 | -2.657454 |
| 7                | 1                | 0              | 1.437022                | -0.538439 | -1.946399 |
| 8                | 7                | 0              | -1.294471               | -0.043623 | 1.760257  |
| 9                | 1                | 0              | -1.374832               | -0.884383 | 2.338274  |
| 10               | 1                | 0              | -1.398390               | 0.777473  | 2.361179  |
| 11               | 7                | 0              | 1.294471                | 0.043623  | 1.760257  |
| 12               | 1                | 0              | 1.374832                | 0.884383  | 2.338274  |
| 13               | 1                | 0              | 1.398390                | -0.777473 | 2.361179  |
| 14               | 1                | 0              | -2.104846               | -0.047423 | 1.135434  |
| 15               | 1                | 0              | 2.104846                | 0.047423  | 1.135434  |
| 16               | 16               | 0              | 0.000000                | 1.544671  | -0.275346 |
| 17               | 16               | 0              | 0.000000                | -1.544671 | -0.275346 |

### 15-NH<sub>3</sub> complex

E = -366.9040217 a.u.

| Center<br>Number | Atomic<br>Number | Atomic<br>Type | Coordinates (Angstroms) |           |           |
|------------------|------------------|----------------|-------------------------|-----------|-----------|
|                  |                  |                | X                       | Y         | Z         |
| 1                | 6                | 0              | -0.742953               | 0.190684  | -1.652972 |
| 2                | 6                | 0              | 0.742953                | -0.190684 | -1.652972 |
| 3                | 1                | 0              | -1.347491               | -0.415531 | -2.325143 |
| 4                | 1                | 0              | -0.890877               | 1.246908  | -1.895317 |
| 5                | 1                | 0              | 1.347491                | 0.415531  | -2.325143 |
| 6                | 1                | 0              | 0.890877                | -1.246908 | -1.895317 |
| 7                | 8                | 0              | 1.157560                | 0.050039  | -0.296267 |
| 8                | 8                | 0              | -1.157560               | -0.050039 | -0.296267 |
| 9                | 5                | 0              | 0.000000                | 0.000000  | 0.484758  |
| 10               | 7                | 0              | 0.000000                | -1.305770 | 1.475102  |
| 11               | 1                | 0              | 0.099926                | -2.111757 | 0.853712  |
| 12               | 1                | 0              | 0.771147                | -1.354053 | 2.142157  |
| 13               | 1                | 0              | -0.881121               | -1.437088 | 1.974956  |
| 14               | 7                | 0              | 0.000000                | 1.305770  | 1.475102  |
| 15               | 1                | 0              | -0.771147               | 1.354053  | 2.142157  |
| 16               | 1                | 0              | 0.881121                | 1.437088  | 1.974956  |
| 17               | 1                | 0              | -0.099926               | 2.111757  | 0.853712  |

### 16-NH<sub>3</sub> complex

E = -689.8554498 a.u.

| Center<br>Number | Atomic<br>Number | Atomic<br>Type | Coordinates (Angstroms) |           |           |
|------------------|------------------|----------------|-------------------------|-----------|-----------|
|                  |                  |                | X                       | Y         | Z         |
| 1                | 5                | 0              | -0.660511               | 0.083626  | 0.033078  |
| 2                | 6                | 0              | 1.914852                | -0.130722 | 0.234714  |
| 3                | 1                | 0              | 2.805798                | -0.381224 | -0.338428 |
| 4                | 1                | 0              | 2.135267                | -0.226911 | 1.297493  |
| 5                | 6                | 0              | 1.381449                | 1.253207  | -0.112421 |
| 6                | 1                | 0              | 1.893324                | 2.043080  | 0.436304  |
| 7                | 1                | 0              | 1.483109                | 1.445391  | -1.185450 |
| 8                | 7                | 0              | -1.644105               | -0.147080 | 1.305408  |
| 9                | 1                | 0              | -2.225201               | 0.668263  | 1.516650  |
| 10               | 1                | 0              | -2.235913               | -0.978229 | 1.268783  |
| 11               | 7                | 0              | -1.639339               | 0.207674  | -1.273985 |
| 12               | 1                | 0              | -2.156237               | -0.638216 | -1.520775 |
| 13               | 1                | 0              | -2.293914               | 0.992131  | -1.227716 |
| 14               | 1                | 0              | -1.018039               | -0.272747 | 2.104585  |
| 15               | 1                | 0              | -1.010533               | 0.392830  | -2.059544 |
| 16               | 16               | 0              | 0.572870                | -1.310611 | -0.213180 |
| 17               | 8                | 0              | -0.004341               | 1.293526  | 0.249983  |

### 17-NH<sub>3</sub> complex

E = -669.9699672 a.u.

---

| Center<br>Number | Atomic<br>Number | Atomic<br>Type | Coordinates (Angstroms) |           |           |
|------------------|------------------|----------------|-------------------------|-----------|-----------|
|                  |                  |                | X                       | Y         | Z         |
| 1                | 5                | 0              | 0.674446                | 0.144858  | -0.035860 |
| 2                | 6                | 0              | -1.925103               | -0.256750 | -0.237184 |
| 3                | 1                | 0              | -2.790971               | -0.621729 | 0.311442  |
| 4                | 1                | 0              | -2.113669               | -0.341941 | -1.306878 |
| 5                | 6                | 0              | -1.547576               | 1.166099  | 0.149741  |
| 6                | 1                | 0              | -2.174862               | 1.886659  | -0.378762 |
| 7                | 1                | 0              | -1.695744               | 1.309417  | 1.227265  |
| 8                | 7                | 0              | 1.683477                | -0.085172 | -1.308477 |
| 9                | 1                | 0              | 2.326049                | 0.684693  | -1.507520 |
| 10               | 1                | 0              | 2.217109                | -0.955826 | -1.288068 |
| 11               | 7                | 0              | 1.676533                | 0.207932  | 1.277044  |
| 12               | 1                | 0              | 2.158865                | -0.668855 | 1.485432  |
| 13               | 1                | 0              | 2.369507                | 0.959168  | 1.277618  |
| 14               | 1                | 0              | 1.050202                | -0.150275 | -2.108854 |
| 15               | 1                | 0              | 1.049312                | 0.376261  | 2.067130  |
| 16               | 16               | 0              | -0.479256               | -1.317939 | 0.189531  |
| 17               | 7                | 0              | -0.141928               | 1.327868  | -0.240276 |
| 18               | 1                | 0              | 0.209566                | 2.274684  | -0.205382 |

---

### 18-NH<sub>3</sub> complex

E = -347.0187072 a.u.

---

| Center<br>Number | Atomic<br>Number | Atomic<br>Type | Coordinates (Angstroms) |           |           |
|------------------|------------------|----------------|-------------------------|-----------|-----------|
|                  |                  |                | X                       | Y         | Z         |
| 1                | 6                | 0              | -1.762692               | -0.397010 | -0.556548 |
| 2                | 6                | 0              | -1.617282               | 0.459055  | 0.704883  |
| 3                | 1                | 0              | -2.532131               | -0.006980 | -1.223786 |
| 4                | 1                | 0              | -2.018869               | -1.431856 | -0.300204 |
| 5                | 1                | 0              | -2.246553               | 0.131017  | 1.529923  |
| 6                | 1                | 0              | -1.827806               | 1.511035  | 0.491709  |
| 7                | 8                | 0              | -0.236546               | 0.325868  | 1.090245  |
| 8                | 7                | 0              | -0.418404               | -0.281872 | -1.143274 |
| 9                | 1                | 0              | -0.240659               | -0.796140 | -1.991553 |
| 10               | 5                | 0              | 0.503021                | -0.016390 | -0.050095 |
| 11               | 7                | 0              | 1.496461                | -1.256226 | 0.411194  |
| 12               | 1                | 0              | 1.952682                | -1.062432 | 1.305143  |
| 13               | 1                | 0              | 0.869965                | -2.045967 | 0.578999  |
| 14               | 1                | 0              | 2.203674                | -1.570370 | -0.253555 |
| 15               | 7                | 0              | 1.539924                | 1.219693  | -0.411123 |
| 16               | 1                | 0              | 2.079274                | 1.554711  | 0.388828  |
| 17               | 1                | 0              | 2.175514                | 1.068272  | -1.194962 |
| 18               | 1                | 0              | 0.916151                | 1.980274  | -0.689621 |

---

### 19-NH<sub>3</sub> complex

E = -613.6962911 a.u.

| Center<br>Number | Atomic<br>Number | Atomic<br>Type | Coordinates (Angstroms) |           |           |
|------------------|------------------|----------------|-------------------------|-----------|-----------|
|                  |                  |                | X                       | Y         | Z         |
| 1                | 5                | 0              | -0.707397               | 0.115026  | 0.025516  |
| 2                | 6                | 0              | 1.950747                | -0.152066 | 0.284255  |
| 3                | 1                | 0              | 2.912022                | -0.416098 | -0.154726 |
| 4                | 1                | 0              | 2.041197                | -0.196791 | 1.370363  |
| 5                | 6                | 0              | 1.503732                | 1.242496  | -0.153686 |
| 6                | 1                | 0              | 2.052371                | 2.014616  | 0.388826  |
| 7                | 1                | 0              | 1.707684                | 1.382129  | -1.222673 |
| 8                | 7                | 0              | -1.641034               | -0.102277 | 1.364550  |
| 9                | 1                | 0              | -2.292320               | 0.662403  | 1.558535  |
| 10               | 1                | 0              | -2.157358               | -0.981634 | 1.418647  |
| 11               | 7                | 0              | -1.801814               | 0.147487  | -1.214993 |
| 12               | 1                | 0              | -2.330115               | -0.716736 | -1.349387 |
| 13               | 1                | 0              | -2.465518               | 0.924624  | -1.196172 |
| 14               | 1                | 0              | -0.969639               | -0.101904 | 2.135146  |
| 15               | 1                | 0              | -1.239608               | 0.264896  | -2.061193 |
| 16               | 7                | 0              | 0.066118                | 1.338148  | 0.141223  |
| 17               | 1                | 0              | -0.319679               | 2.270569  | 0.074882  |
| 18               | 15               | 0              | 0.606784                | -1.320894 | -0.317471 |
| 19               | 1                | 0              | 0.406431                | -2.093885 | 0.853356  |

### 20-NH<sub>3</sub> complex

E = -327.1324432 a.u.

| Center<br>Number | Atomic<br>Number | Atomic<br>Type | Coordinates (Angstroms) |           |           |
|------------------|------------------|----------------|-------------------------|-----------|-----------|
|                  |                  |                | X                       | Y         | Z         |
| 1                | 5                | 0              | 0.000000                | 0.000000  | 0.521429  |
| 2                | 6                | 0              | 0.731466                | 0.222652  | -1.731813 |
| 3                | 1                | 0              | 1.323361                | -0.321270 | -2.468239 |
| 4                | 1                | 0              | 0.799426                | 1.294316  | -1.954321 |
| 5                | 6                | 0              | -0.731466               | -0.222652 | -1.731813 |
| 6                | 1                | 0              | -1.323361               | 0.321270  | -2.468239 |
| 7                | 1                | 0              | -0.799426               | -1.294316 | -1.954321 |
| 8                | 7                | 0              | 0.000000                | 1.305760  | 1.557743  |
| 9                | 1                | 0              | -0.840104               | 1.390585  | 2.132059  |
| 10               | 1                | 0              | 0.812070                | 1.413294  | 2.166577  |
| 11               | 7                | 0              | 0.000000                | -1.305760 | 1.557743  |
| 12               | 1                | 0              | 0.840104                | -1.390585 | 2.132059  |
| 13               | 1                | 0              | -0.812070               | -1.413294 | 2.166577  |
| 14               | 1                | 0              | -0.013725               | 2.104703  | 0.920583  |
| 15               | 1                | 0              | 0.013725                | -2.104703 | 0.920583  |
| 16               | 7                | 0              | -1.163731               | 0.081410  | -0.356644 |
| 17               | 7                | 0              | 1.163731                | -0.081410 | -0.356644 |
| 18               | 1                | 0              | -2.101108               | -0.205213 | -0.117041 |
| 19               | 1                | 0              | 2.101108                | 0.205213  | -0.117041 |

## 21-NH<sub>3</sub> complex

E = -768.4371438 a.u.

| Center<br>Number | Atomic<br>Number | Atomic<br>Type | Coordinates (Angstroms) |           |           |
|------------------|------------------|----------------|-------------------------|-----------|-----------|
|                  |                  |                | X                       | Y         | Z         |
| 1                | 6                | 0              | 2.484688                | -0.545826 | -0.297039 |
| 2                | 6                | 0              | 1.832660                | -0.734876 | 1.081982  |
| 3                | 1                | 0              | 2.838758                | -1.494199 | -0.704008 |
| 4                | 1                | 0              | 3.334142                | 0.143164  | -0.240647 |
| 5                | 1                | 0              | 2.513337                | -0.541251 | 1.908919  |
| 6                | 1                | 0              | 1.420767                | -1.740749 | 1.190880  |
| 7                | 7                | 0              | 1.376293                | 0.014912  | -1.081807 |
| 8                | 1                | 0              | 1.536427                | 0.239187  | -2.050208 |
| 9                | 8                | 0              | 0.755458                | 0.221428  | 1.139676  |
| 10               | 5                | 0              | 0.425790                | 0.585857  | -0.165086 |
| 11               | 16               | 0              | -1.525372               | -0.110903 | -0.612215 |
| 12               | 6                | 0              | -2.414303               | 0.282966  | 0.918974  |
| 13               | 1                | 0              | -2.773419               | 1.309875  | 0.854199  |
| 14               | 1                | 0              | -3.275900               | -0.377806 | 1.001021  |
| 15               | 1                | 0              | -1.739727               | 0.151434  | 1.765504  |
| 16               | 6                | 0              | -1.176641               | -1.864087 | -0.335670 |
| 17               | 1                | 0              | -0.804862               | -1.992253 | 0.680284  |
| 18               | 1                | 0              | -2.092376               | -2.430404 | -0.492669 |
| 19               | 1                | 0              | -0.420055               | -2.154120 | -1.062830 |
| 20               | 7                | 0              | 0.178044                | 2.192232  | -0.201961 |
| 21               | 1                | 0              | 1.089171                | 2.637275  | -0.068525 |
| 22               | 1                | 0              | -0.216466               | 2.546994  | -1.073900 |
| 23               | 1                | 0              | -0.415229               | 2.497520  | 0.572323  |



## 22-NH<sub>3</sub> complex

E = -445.4621287 a.u.

---

| Center<br>Number | Atomic<br>Number | Atomic<br>Type | Coordinates (Angstroms) |           |           |
|------------------|------------------|----------------|-------------------------|-----------|-----------|
|                  |                  |                | X                       | Y         | Z         |
| 1                | 6                | 0              | -2.084549               | -0.123129 | 0.951349  |
| 2                | 6                | 0              | -1.923896               | -0.917278 | -0.349672 |
| 3                | 1                | 0              | -2.372436               | -0.766425 | 1.783653  |
| 4                | 1                | 0              | -2.841071               | 0.660994  | 0.839363  |
| 5                | 1                | 0              | -2.830387               | -0.956750 | -0.950064 |
| 6                | 1                | 0              | -1.581245               | -1.937268 | -0.150601 |
| 7                | 7                | 0              | -0.733968               | 0.434685  | 1.126373  |
| 8                | 1                | 0              | -0.600632               | 1.077000  | 1.891177  |
| 9                | 8                | 0              | -0.906800               | -0.218654 | -1.091118 |
| 10               | 5                | 0              | -0.115016               | 0.473265  | -0.180347 |
| 11               | 6                | 0              | 1.453973                | -1.584125 | -0.516569 |
| 12               | 1                | 0              | 0.956320                | -2.153448 | 0.270777  |
| 13               | 1                | 0              | 0.940567                | -1.695295 | -1.465555 |
| 14               | 1                | 0              | 2.502154                | -1.865068 | -0.598978 |
| 15               | 6                | 0              | 2.171262                | 0.101921  | 1.027853  |
| 16               | 1                | 0              | 3.209766                | -0.159220 | 0.833070  |
| 17               | 1                | 0              | 2.092502                | 1.167880  | 1.237098  |
| 18               | 1                | 0              | 1.758975                | -0.472094 | 1.857724  |
| 19               | 8                | 0              | 1.408008                | -0.172750 | -0.168527 |
| 20               | 7                | 0              | 0.260352                | 1.900035  | -0.859075 |
| 21               | 1                | 0              | 0.937564                | 2.480817  | -0.365795 |
| 22               | 1                | 0              | 0.612642                | 1.740642  | -1.805441 |
| 23               | 1                | 0              | -0.604739               | 2.435760  | -0.946382 |

---

### 23-NH<sub>3</sub> complex

E = -464.9212122 a.u.

---

| Center<br>Number | Atomic<br>Number | Atomic<br>Type | Coordinates (Angstroms) |           |           |
|------------------|------------------|----------------|-------------------------|-----------|-----------|
|                  |                  |                | X                       | Y         | Z         |
| 1                | 6                | 0              | -2.421122               | -0.202132 | 0.670985  |
| 2                | 6                | 0              | -2.128236               | -0.678925 | -0.753808 |
| 3                | 1                | 0              | -2.931651               | -0.967670 | 1.257241  |
| 4                | 1                | 0              | -3.051807               | 0.695979  | 0.657340  |
| 5                | 1                | 0              | -2.929047               | -0.462006 | -1.458707 |
| 6                | 1                | 0              | -1.920751               | -1.753476 | -0.770752 |
| 7                | 7                | 0              | -1.066167               | 0.067215  | 1.174203  |
| 8                | 1                | 0              | -1.008186               | 0.490968  | 2.087651  |
| 9                | 8                | 0              | -0.946847               | 0.034958  | -1.151087 |
| 10               | 5                | 0              | -0.242638               | 0.408963  | 0.012418  |
| 11               | 7                | 0              | 1.241518                | -0.282304 | 0.044716  |
| 12               | 6                | 0              | 1.935290                | -0.026451 | 1.332643  |
| 13               | 1                | 0              | 2.900180                | -0.535956 | 1.336734  |
| 14               | 1                | 0              | 2.106984                | 1.043355  | 1.461288  |
| 15               | 1                | 0              | 1.314766                | -0.405127 | 2.143437  |
| 16               | 6                | 0              | 1.018646                | -1.755336 | -0.089241 |
| 17               | 1                | 0              | 0.569333                | -1.949259 | -1.061366 |
| 18               | 1                | 0              | 1.979083                | -2.265799 | -0.007931 |
| 19               | 1                | 0              | 0.347420                | -2.074517 | 0.705436  |
| 20               | 6                | 0              | 2.086021                | 0.165194  | -1.094727 |
| 21               | 1                | 0              | 2.408453                | 1.195644  | -0.939253 |
| 22               | 1                | 0              | 2.974805                | -0.463818 | -1.159553 |
| 23               | 1                | 0              | 1.504800                | 0.078333  | -2.013264 |
| 24               | 7                | 0              | 0.034529                | 2.043332  | -0.183116 |
| 25               | 1                | 0              | -0.884434               | 2.470880  | -0.058808 |
| 26               | 1                | 0              | 0.672998                | 2.509445  | 0.460853  |
| 27               | 1                | 0              | 0.322265                | 2.256745  | -1.139468 |

---

## 24-NH<sub>3</sub> complex

E = -751.5204965 a.u.

| Center<br>Number | Atomic<br>Number | Atomic<br>Type | Coordinates (Angstroms) |           |           |
|------------------|------------------|----------------|-------------------------|-----------|-----------|
|                  |                  |                | X                       | Y         | Z         |
| 1                | 6                | 0              | -2.374209               | 0.929075  | 0.613873  |
| 2                | 6                | 0              | -2.485623               | 0.411692  | -0.821924 |
| 3                | 1                | 0              | -3.342972               | 0.934993  | 1.116146  |
| 4                | 1                | 0              | -1.971768               | 1.949382  | 0.629627  |
| 5                | 1                | 0              | -2.673140               | 1.196463  | -1.553257 |
| 6                | 1                | 0              | -3.270862               | -0.345839 | -0.905526 |
| 7                | 7                | 0              | -1.454228               | -0.048465 | 1.211112  |
| 8                | 1                | 0              | -1.141792               | 0.152909  | 2.148874  |
| 9                | 8                | 0              | -1.213012               | -0.195024 | -1.105585 |
| 10               | 5                | 0              | -0.616981               | -0.573100 | 0.123099  |
| 11               | 15               | 0              | 1.263822                | 0.158501  | -0.002461 |
| 12               | 6                | 0              | 1.042621                | 1.956861  | -0.067817 |
| 13               | 1                | 0              | 2.001402                | 2.454869  | -0.219371 |
| 14               | 1                | 0              | 0.370696                | 2.193162  | -0.894388 |
| 15               | 1                | 0              | 0.597397                | 2.303717  | 0.866288  |
| 16               | 6                | 0              | 2.418770                | -0.178238 | 1.364434  |
| 17               | 1                | 0              | 2.661319                | -1.241639 | 1.406320  |
| 18               | 1                | 0              | 3.343941                | 0.382817  | 1.220335  |
| 19               | 1                | 0              | 1.968898                | 0.122644  | 2.312268  |
| 20               | 6                | 0              | 2.110177                | -0.314740 | -1.540576 |
| 21               | 1                | 0              | 3.016339                | 0.278601  | -1.674570 |
| 22               | 1                | 0              | 2.384976                | -1.370992 | -1.516198 |
| 23               | 1                | 0              | 1.431410                | -0.139297 | -2.377171 |
| 24               | 7                | 0              | -0.553381               | -2.221680 | 0.190310  |
| 25               | 1                | 0              | -1.529861               | -2.517919 | 0.260837  |
| 26               | 1                | 0              | -0.162210               | -2.639210 | -0.654820 |
| 27               | 1                | 0              | -0.069268               | -2.603366 | 1.002807  |

## 26-NH<sub>3</sub> complex

E = -898.7804041 a.u.

| Center<br>Number | Atomic<br>Number | Atomic<br>Type | Coordinates (Angstroms) |           |           |
|------------------|------------------|----------------|-------------------------|-----------|-----------|
|                  |                  |                | X                       | Y         | Z         |
| 1                | 6                | 0              | -2.763297               | 0.538937  | 0.985237  |
| 2                | 6                | 0              | -2.909811               | 0.504280  | -0.541201 |
| 3                | 1                | 0              | -3.684429               | 0.222698  | 1.479254  |
| 4                | 1                | 0              | -2.526541               | 1.550581  | 1.337502  |
| 5                | 1                | 0              | -3.248175               | 1.449470  | -0.965511 |
| 6                | 1                | 0              | -3.612912               | -0.279624 | -0.845849 |
| 7                | 7                | 0              | -1.663554               | -0.405827 | 1.205954  |
| 8                | 1                | 0              | -1.243939               | -0.393650 | 2.122430  |
| 9                | 8                | 0              | -1.605786               | 0.201572  | -1.049373 |
| 10               | 5                | 0              | -0.908627               | -0.536271 | -0.056406 |
| 11               | 6                | 0              | 0.690661                | -0.151445 | -0.029178 |
| 12               | 16               | 0              | 1.989271                | -1.237284 | 0.161937  |
| 13               | 6                | 0              | 2.531974                | 1.214378  | -0.012361 |
| 14               | 6                | 0              | 3.153752                | 0.028115  | 0.135745  |
| 15               | 1                | 0              | 2.984098                | 2.193028  | -0.068753 |
| 16               | 1                | 0              | 4.210649                | -0.163603 | 0.230252  |
| 17               | 7                | 0              | 1.155670                | 1.091638  | -0.098724 |
| 18               | 6                | 0              | 0.283305                | 2.272827  | -0.256503 |
| 19               | 1                | 0              | 0.881856                | 3.160320  | -0.066845 |
| 20               | 1                | 0              | -0.128391               | 2.283679  | -1.262923 |
| 21               | 1                | 0              | -0.524938               | 2.206781  | 0.467508  |
| 22               | 7                | 0              | -0.970422               | -2.156141 | -0.546941 |
| 23               | 1                | 0              | -1.968237               | -2.370716 | -0.567105 |
| 24               | 1                | 0              | -0.600156               | -2.318557 | -1.483823 |
| 25               | 1                | 0              | -0.549169               | -2.825330 | 0.097440  |

## 27-NH<sub>3</sub> complex

E = -595.2653379 a.u.

| Center<br>Number | Atomic<br>Number | Atomic<br>Type | Coordinates (Angstroms) |           |           |
|------------------|------------------|----------------|-------------------------|-----------|-----------|
|                  |                  |                | X                       | Y         | Z         |
| 1                | 6                | 0              | -2.653909               | -0.308215 | 1.269374  |
| 2                | 6                | 0              | -2.894664               | 0.745089  | 0.188868  |
| 3                | 1                | 0              | -3.549289               | -0.901933 | 1.462353  |
| 4                | 1                | 0              | -2.346186               | 0.171945  | 2.204802  |
| 5                | 1                | 0              | -3.287428               | 1.684076  | 0.576389  |
| 6                | 1                | 0              | -3.585499               | 0.369506  | -0.576222 |
| 7                | 7                | 0              | -1.567101               | -1.114416 | 0.685389  |
| 8                | 1                | 0              | -1.048686               | -1.623867 | 1.386009  |
| 9                | 8                | 0              | -1.608546               | 0.977251  | -0.394043 |
| 10               | 5                | 0              | -0.867921               | -0.231828 | -0.288878 |
| 11               | 6                | 0              | 2.896894                | -0.318236 | 0.361682  |
| 12               | 6                | 0              | 2.696619                | 1.017956  | 0.272605  |
| 13               | 1                | 0              | 3.787495                | -0.889526 | 0.562982  |
| 14               | 1                | 0              | 3.382143                | 1.841113  | 0.381195  |
| 15               | 6                | 0              | 0.730767                | 0.024635  | -0.079829 |
| 16               | 7                | 0              | 1.674034                | -0.913026 | 0.140859  |
| 17               | 7                | 0              | 1.360695                | 1.209817  | -0.002967 |
| 18               | 6                | 0              | 1.466269                | -2.360488 | 0.158077  |
| 19               | 1                | 0              | 0.404846                | -2.577390 | 0.053732  |
| 20               | 1                | 0              | 2.023301                | -2.822965 | -0.657170 |
| 21               | 1                | 0              | 1.813724                | -2.764035 | 1.108668  |
| 22               | 6                | 0              | 0.748145                | 2.539126  | -0.145437 |
| 23               | 1                | 0              | 0.117792                | 2.562276  | -1.028701 |
| 24               | 1                | 0              | 0.139822                | 2.759537  | 0.728748  |
| 25               | 1                | 0              | 1.555195                | 3.262640  | -0.236095 |
| 26               | 7                | 0              | -1.017647               | -0.959082 | -1.830507 |
| 27               | 1                | 0              | -1.994585               | -1.249196 | -1.889457 |
| 28               | 1                | 0              | -0.839943               | -0.291969 | -2.581060 |
| 29               | 1                | 0              | -0.455321               | -1.791327 | -2.000900 |

**28-NH<sub>3</sub> complex**

E = -748.8859931 a.u.

---

| Center<br>Number | Atomic<br>Number | Atomic<br>Type | Coordinates (Angstroms) |           |           |
|------------------|------------------|----------------|-------------------------|-----------|-----------|
|                  |                  |                | X                       | Y         | Z         |
| 1                | 6                | 0              | -3.722471               | 0.971841  | -0.863532 |
| 2                | 6                | 0              | -3.738372               | -0.551595 | -1.017081 |
| 3                | 1                | 0              | -4.698297               | 1.360951  | -0.569899 |
| 4                | 1                | 0              | -3.431363               | 1.454465  | -1.801145 |
| 5                | 1                | 0              | -3.933991               | -0.888569 | -2.034092 |
| 6                | 1                | 0              | -4.481064               | -1.006503 | -0.349110 |
| 7                | 7                | 0              | -2.703968               | 1.192401  | 0.175263  |
| 8                | 1                | 0              | -2.963859               | 1.804391  | 0.932214  |
| 9                | 8                | 0              | -2.425932               | -0.977508 | -0.634923 |
| 10               | 5                | 0              | -1.901647               | -0.042850 | 0.299935  |
| 11               | 6                | 0              | 1.867454                | 0.719789  | 0.008309  |
| 12               | 6                | 0              | 1.865019                | -0.670005 | -0.060451 |
| 13               | 6                | 0              | -0.255897               | 0.024350  | 0.167814  |
| 14               | 7                | 0              | 0.535713                | -1.060801 | 0.039896  |
| 15               | 7                | 0              | 0.539725                | 1.109376  | 0.146323  |
| 16               | 6                | 0              | 0.118732                | -2.458882 | -0.038530 |
| 17               | 1                | 0              | 0.597377                | -2.915704 | -0.904957 |
| 18               | 1                | 0              | 0.432286                | -2.990601 | 0.862445  |
| 19               | 1                | 0              | -0.957732               | -2.505555 | -0.181830 |
| 20               | 6                | 0              | 0.148567                | 2.516820  | 0.214475  |
| 21               | 1                | 0              | 0.448876                | 2.935036  | 1.176321  |
| 22               | 1                | 0              | 0.657479                | 3.051554  | -0.587491 |
| 23               | 1                | 0              | -0.925584               | 2.586556  | 0.074832  |
| 24               | 6                | 0              | 3.041100                | -1.402005 | -0.209692 |
| 25               | 1                | 0              | 3.042179                | -2.483242 | -0.264213 |
| 26               | 6                | 0              | 3.047290                | 1.457519  | -0.065958 |
| 27               | 1                | 0              | 3.052818                | 2.538594  | -0.010384 |
| 28               | 6                | 0              | 4.217901                | 0.733192  | -0.212312 |
| 29               | 1                | 0              | 5.161641                | 1.260009  | -0.274583 |
| 30               | 6                | 0              | 4.214937                | -0.671631 | -0.283333 |
| 31               | 1                | 0              | 5.156478                | -1.193200 | -0.399443 |
| 32               | 7                | 0              | -2.141614               | -0.721600 | 1.855975  |
| 33               | 1                | 0              | -3.145804               | -0.876266 | 1.951910  |
| 34               | 1                | 0              | -1.682280               | -1.625368 | 1.970376  |
| 35               | 1                | 0              | -1.848016               | -0.124226 | 2.628312  |

---

## 29-NH<sub>3</sub> complex

E = -617.3377707 a.u.

| Center<br>Number | Atomic<br>Number | Atomic<br>Type | Coordinates (Angstroms) |           |           |
|------------------|------------------|----------------|-------------------------|-----------|-----------|
|                  |                  |                | X                       | Y         | Z         |
| 1                | 6                | 0              | 2.652104                | -0.377738 | -1.392386 |
| 2                | 6                | 0              | 2.971697                | 0.796965  | -0.475590 |
| 3                | 1                | 0              | 3.543542                | -0.956827 | -1.638264 |
| 4                | 1                | 0              | 2.195190                | -0.026840 | -2.325029 |
| 5                | 1                | 0              | 3.225190                | 1.712296  | -1.008891 |
| 6                | 1                | 0              | 3.786761                | 0.550236  | 0.212604  |
| 7                | 7                | 0              | 1.708027                | -1.146164 | -0.569045 |
| 8                | 1                | 0              | 1.239256                | -1.879809 | -1.073300 |
| 9                | 8                | 0              | 1.770502                | 1.010042  | 0.275623  |
| 10               | 5                | 0              | 1.032257                | -0.188214 | 0.326508  |
| 11               | 6                | 0              | -1.357309               | -1.095727 | -0.034475 |
| 12               | 6                | 0              | -1.156245               | 1.256306  | 0.043645  |
| 13               | 6                | 0              | -2.703385               | -0.989631 | -0.347026 |
| 14               | 6                | 0              | -2.501901               | 1.376631  | -0.286832 |
| 15               | 6                | 0              | -3.283316               | 0.256950  | -0.500737 |
| 16               | 1                | 0              | -3.280846               | -1.896924 | -0.469807 |
| 17               | 1                | 0              | -2.925685               | 2.368795  | -0.362516 |
| 18               | 1                | 0              | -4.330519               | 0.353184  | -0.761503 |
| 19               | 7                | 0              | -0.584799               | 0.016741  | 0.129791  |
| 20               | 6                | 0              | -0.805187               | -2.492941 | 0.112415  |
| 21               | 1                | 0              | -0.698070               | -2.950981 | -0.875009 |
| 22               | 1                | 0              | 0.158615                | -2.565644 | 0.607139  |
| 23               | 1                | 0              | -1.527314               | -3.096224 | 0.663676  |
| 24               | 6                | 0              | -0.395640               | 2.522793  | 0.321511  |
| 25               | 1                | 0              | 0.187876                | 2.462207  | 1.237671  |
| 26               | 1                | 0              | 0.305845                | 2.747838  | -0.480719 |
| 27               | 1                | 0              | -1.112082               | 3.337282  | 0.409334  |
| 28               | 7                | 0              | 1.130391                | -0.665852 | 1.941021  |
| 29               | 1                | 0              | 0.411755                | -1.282366 | 2.317204  |
| 30               | 1                | 0              | 2.029441                | -1.141878 | 2.031342  |
| 31               | 1                | 0              | 1.165492                | 0.171666  | 2.523020  |

#### 4-HCHO complex

E = -196.8794261 a.u.

---

| Center<br>Number | Atomic<br>Number | Atomic<br>Type | Coordinates (Angstroms) |           |           |
|------------------|------------------|----------------|-------------------------|-----------|-----------|
|                  |                  |                | X                       | Y         | Z         |
| 1                | 5                | 0              | 0.472941                | 0.691627  | 0.072711  |
| 2                | 1                | 0              | 0.482864                | 1.224666  | 1.135526  |
| 3                | 1                | 0              | 0.345364                | 1.361101  | -0.902714 |
| 4                | 7                | 0              | 1.751269                | -0.248646 | -0.062824 |
| 5                | 1                | 0              | 2.590400                | 0.335551  | -0.053663 |
| 6                | 1                | 0              | 1.840493                | -0.906111 | 0.714282  |
| 7                | 1                | 0              | 1.773236                | -0.784583 | -0.932079 |
| 8                | 8                | 0              | -0.703939               | -0.356716 | 0.104633  |
| 9                | 6                | 0              | -1.874091               | -0.043761 | -0.071575 |
| 10               | 1                | 0              | -2.146376               | 0.990693  | -0.303224 |
| 11               | 1                | 0              | -2.633509               | -0.822634 | 0.010472  |

---

#### 5-HCHO complex

E = -395.502908 a.u.

---

| Center<br>Number | Atomic<br>Number | Atomic<br>Type | Coordinates (Angstroms) |           |           |
|------------------|------------------|----------------|-------------------------|-----------|-----------|
|                  |                  |                | X                       | Y         | Z         |
| 1                | 5                | 0              | 0.373854                | -0.190353 | -0.015937 |
| 2                | 7                | 0              | 1.514006                | 0.901733  | 0.180727  |
| 3                | 1                | 0              | 2.415642                | 0.420006  | 0.252118  |
| 4                | 1                | 0              | 1.576163                | 1.540815  | -0.615858 |
| 5                | 1                | 0              | 1.397968                | 1.456118  | 1.032026  |
| 6                | 8                | 0              | -0.934545               | 0.691757  | -0.234560 |
| 7                | 6                | 0              | -2.041440               | 0.223771  | 0.018780  |
| 8                | 1                | 0              | -2.135787               | -0.775318 | 0.455885  |
| 9                | 1                | 0              | -2.918617               | 0.834249  | -0.200794 |
| 10               | 9                | 0              | 0.190991                | -0.888689 | 1.120161  |
| 11               | 9                | 0              | 0.578156                | -0.857191 | -1.158491 |

---



### 6-HCHO complex

E = -1116.1706334 a.u.

---

| Center<br>Number | Atomic<br>Number | Atomic<br>Type | Coordinates (Angstroms) |           |           |
|------------------|------------------|----------------|-------------------------|-----------|-----------|
|                  |                  |                | X                       | Y         | Z         |
| 1                | 5                | 0              | 0.053900                | -0.212170 | 0.208643  |
| 2                | 7                | 0              | 0.244835                | -0.998251 | 1.574444  |
| 3                | 1                | 0              | 0.481265                | -1.972394 | 1.362883  |
| 4                | 1                | 0              | 1.009197                | -0.615316 | 2.138359  |
| 5                | 1                | 0              | -0.608193               | -1.007735 | 2.141001  |
| 6                | 8                | 0              | -0.285076               | 1.240256  | 0.745960  |
| 7                | 6                | 0              | -0.536037               | 2.172130  | -0.014457 |
| 8                | 1                | 0              | -0.539603               | 2.022641  | -1.099160 |
| 9                | 1                | 0              | -0.752886               | 3.145483  | 0.427449  |
| 10               | 17               | 0              | 1.607098                | -0.131714 | -0.678694 |
| 11               | 17               | 0              | -1.376292               | -0.837633 | -0.669294 |

---

### 7-HCHO complex

E = -275.5207574 a.u.

---

| Center<br>Number | Atomic<br>Number | Atomic<br>Type | Coordinates (Angstroms) |           |           |
|------------------|------------------|----------------|-------------------------|-----------|-----------|
|                  |                  |                | X                       | Y         | Z         |
| 1                | 5                | 0              | 0.394645                | 0.000008  | 0.140841  |
| 2                | 7                | 0              | 1.411935                | -0.000100 | -1.115222 |
| 3                | 1                | 0              | 2.372557                | -0.000465 | -0.767309 |
| 4                | 1                | 0              | 1.308091                | -0.826399 | -1.707061 |
| 5                | 1                | 0              | 1.308601                | 0.826451  | -1.706797 |
| 6                | 8                | 0              | -0.998169               | -0.000070 | -0.711538 |
| 7                | 6                | 0              | -2.094850               | 0.000011  | -0.174220 |
| 8                | 1                | 0              | -2.184034               | 0.000146  | 0.917053  |
| 9                | 1                | 0              | -2.985557               | -0.000065 | -0.805005 |
| 10               | 6                | 0              | 0.482420                | 1.377501  | 0.921254  |
| 11               | 1                | 0              | -0.253693               | 1.432998  | 1.728795  |
| 12               | 1                | 0              | 1.456729                | 1.479915  | 1.409267  |
| 13               | 1                | 0              | 0.341666                | 2.259635  | 0.287802  |
| 14               | 6                | 0              | 0.482386                | -1.377350 | 0.921485  |
| 15               | 1                | 0              | 0.342176                | -2.259627 | 0.288117  |
| 16               | 1                | 0              | 1.456460                | -1.479432 | 1.410030  |
| 17               | 1                | 0              | -0.254148               | -1.432901 | 1.728642  |

---

## 8-HCHO complex

E = -958.1814135 a.u.

| Center<br>Number | Atomic<br>Number | Atomic<br>Type | Coordinates (Angstroms) |           |           |
|------------------|------------------|----------------|-------------------------|-----------|-----------|
|                  |                  |                | X                       | Y         | Z         |
| 1                | 5                | 0              | -0.651825               | 0.056243  | 0.392333  |
| 2                | 6                | 0              | 1.893295                | 0.604955  | -0.717790 |
| 3                | 1                | 0              | 2.821156                | 1.178362  | -0.722565 |
| 4                | 1                | 0              | 1.623754                | 0.407032  | -1.758314 |
| 5                | 6                | 0              | 2.066552                | -0.706457 | 0.054650  |
| 6                | 1                | 0              | 2.806527                | -1.347847 | -0.425529 |
| 7                | 1                | 0              | 2.403955                | -0.510850 | 1.074545  |
| 8                | 15               | 0              | 0.568082                | 1.587473  | 0.170342  |
| 9                | 1                | 0              | -0.067714               | 2.239422  | -0.914803 |
| 10               | 7                | 0              | -1.371177               | 0.137759  | 1.824413  |
| 11               | 1                | 0              | -1.967774               | 0.964824  | 1.916988  |
| 12               | 1                | 0              | -1.937670               | -0.682334 | 2.051839  |
| 13               | 1                | 0              | -0.648705               | 0.218482  | 2.543311  |
| 14               | 15               | 0              | 0.403109                | -1.566565 | 0.041227  |
| 15               | 1                | 0              | 0.381912                | -2.168784 | 1.322381  |
| 16               | 8                | 0              | -1.914814               | 0.087753  | -0.527403 |
| 17               | 6                | 0              | -1.939980               | -0.211563 | -1.720373 |
| 18               | 1                | 0              | -1.034594               | -0.552487 | -2.229450 |
| 19               | 1                | 0              | -2.892036               | -0.128603 | -2.244189 |

## 9-HCHO complex

E = -467.2326493 a.u.

| Center<br>Number | Atomic<br>Number | Atomic<br>Type | Coordinates (Angstroms) |           |           |
|------------------|------------------|----------------|-------------------------|-----------|-----------|
|                  |                  |                | X                       | Y         | Z         |
| 1                | 5                | 0              | 1.298705                | 0.337046  | 0.224304  |
| 2                | 7                | 0              | 1.804626                | 0.007887  | 1.722305  |
| 3                | 1                | 0              | 1.376868                | -0.832738 | 2.114630  |
| 4                | 1                | 0              | 2.820027                | -0.086491 | 1.788556  |
| 5                | 1                | 0              | 1.529237                | 0.784771  | 2.326512  |
| 6                | 6                | 0              | -0.275195               | 0.186180  | 0.134485  |
| 7                | 6                | 0              | -0.920335               | -0.990520 | 0.552052  |
| 8                | 6                | 0              | -1.070417               | 1.219526  | -0.372211 |
| 9                | 6                | 0              | -2.300197               | -1.129914 | 0.469787  |
| 10               | 1                | 0              | -0.345339               | -1.831794 | 0.939774  |
| 11               | 6                | 0              | -2.454807               | 1.089707  | -0.454127 |
| 12               | 1                | 0              | -0.607360               | 2.142415  | -0.706073 |
| 13               | 6                | 0              | -3.069524               | -0.083838 | -0.034054 |
| 14               | 1                | 0              | -2.776253               | -2.046164 | 0.797953  |
| 15               | 1                | 0              | -3.052007               | 1.903923  | -0.846505 |
| 16               | 1                | 0              | -4.146163               | -0.186459 | -0.098159 |
| 17               | 6                | 0              | 2.035032                | 1.624896  | -0.330459 |
| 18               | 1                | 0              | 1.727536                | 2.520508  | 0.218671  |
| 19               | 1                | 0              | 3.125718                | 1.560771  | -0.265650 |
| 20               | 1                | 0              | 1.784153                | 1.806221  | -1.379578 |
| 21               | 8                | 0              | 1.984193                | -0.940264 | -0.534547 |
| 22               | 6                | 0              | 1.534960                | -1.381322 | -1.583330 |
| 23               | 1                | 0              | 2.077138                | -2.188210 | -2.079553 |
| 24               | 1                | 0              | 0.609890                | -0.973371 | -2.004715 |

# 10-HCHO complex

E = -658.9397699 a.u.

---

| Center<br>Number | Atomic<br>Number | Atomic<br>Type | Coordinates (Angstroms) |           |           |
|------------------|------------------|----------------|-------------------------|-----------|-----------|
|                  |                  |                | X                       | Y         | Z         |
| 1                | 5                | 0              | -0.001781               | 0.766441  | 0.428611  |
| 2                | 7                | 0              | -0.040497               | 1.383000  | 1.922334  |
| 3                | 1                | 0              | -0.220260               | 0.611213  | 2.568139  |
| 4                | 1                | 0              | 0.826722                | 1.832143  | 2.221103  |
| 5                | 1                | 0              | -0.810105               | 2.046573  | 2.033075  |
| 6                | 6                | 0              | -1.412069               | 0.098701  | 0.141703  |
| 7                | 6                | 0              | -1.676093               | -1.152233 | 0.722577  |
| 8                | 6                | 0              | -2.437520               | 0.704418  | -0.593246 |
| 9                | 6                | 0              | -2.909150               | -1.774299 | 0.569591  |
| 10               | 1                | 0              | -0.897891               | -1.662566 | 1.285388  |
| 11               | 6                | 0              | -3.672488               | 0.081179  | -0.757671 |
| 12               | 1                | 0              | -2.294983               | 1.680785  | -1.046482 |
| 13               | 6                | 0              | -3.910184               | -1.157658 | -0.175944 |
| 14               | 1                | 0              | -3.086215               | -2.742439 | 1.022787  |
| 15               | 1                | 0              | -4.449242               | 0.567089  | -1.335880 |
| 16               | 1                | 0              | -4.870698               | -1.642219 | -0.303010 |
| 17               | 6                | 0              | 1.347438                | -0.027223 | 0.171890  |
| 18               | 6                | 0              | 2.584337                | 0.493468  | 0.588110  |
| 19               | 6                | 0              | 1.358087                | -1.233339 | -0.540648 |
| 20               | 6                | 0              | 3.778090                | -0.166223 | 0.322659  |
| 21               | 1                | 0              | 2.640812                | 1.442215  | 1.120317  |
| 22               | 6                | 0              | 2.550492                | -1.899834 | -0.811566 |
| 23               | 1                | 0              | 0.422113                | -1.658528 | -0.887503 |
| 24               | 6                | 0              | 3.759763                | -1.370255 | -0.376617 |
| 25               | 1                | 0              | 4.718565                | 0.252974  | 0.659782  |
| 26               | 1                | 0              | 2.534103                | -2.832520 | -1.362484 |
| 27               | 1                | 0              | 4.687371                | -1.890212 | -0.583624 |
| 28               | 8                | 0              | 0.065194                | 2.159927  | -0.401255 |
| 29               | 6                | 0              | 0.503026                | 2.196492  | -1.543547 |
| 30               | 1                | 0              | 0.465819                | 3.147254  | -2.078744 |
| 31               | 1                | 0              | 0.922341                | 1.296451  | -2.005967 |

---

### 11-HCHO complex

E = -577.236997 a.u.

---

| Center<br>Number | Atomic<br>Number | Atomic<br>Type | Coordinates (Angstroms) |           |           |
|------------------|------------------|----------------|-------------------------|-----------|-----------|
|                  |                  |                | X                       | Y         | Z         |
| 1                | 6                | 0              | -0.648820               | 0.384686  | 0.579550  |
| 2                | 6                | 0              | -0.679250               | -0.694649 | -0.297200 |
| 3                | 6                | 0              | -1.850849               | -1.137039 | -0.868289 |
| 4                | 6                | 0              | -3.013244               | -0.441856 | -0.518773 |
| 5                | 6                | 0              | -2.981339               | 0.637286  | 0.360284  |
| 6                | 6                | 0              | -1.783655               | 1.077250  | 0.934553  |
| 7                | 1                | 0              | -1.864493               | -1.981606 | -1.544526 |
| 8                | 1                | 0              | -3.959473               | -0.755711 | -0.940709 |
| 9                | 1                | 0              | -3.902125               | 1.149028  | 0.609026  |
| 10               | 1                | 0              | -1.746833               | 1.910116  | 1.624658  |
| 11               | 8                | 0              | 0.601857                | -1.205069 | -0.453891 |
| 12               | 8                | 0              | 0.664103                | 0.609179  | 0.992631  |
| 13               | 5                | 0              | 1.412264                | -0.312552 | 0.250319  |
| 14               | 7                | 0              | 2.572911                | -1.029577 | 1.047886  |
| 15               | 1                | 0              | 3.165201                | -1.590043 | 0.430043  |
| 16               | 1                | 0              | 3.168331                | -0.376043 | 1.561019  |
| 17               | 1                | 0              | 2.151661                | -1.665672 | 1.729642  |
| 18               | 8                | 0              | 2.321656                | 0.523269  | -0.856405 |
| 19               | 6                | 0              | 1.912894                | 1.595820  | -1.284091 |
| 20               | 1                | 0              | 1.018197                | 2.057701  | -0.853696 |
| 21               | 1                | 0              | 2.462490                | 2.074006  | -2.097128 |

---

### 12-HCHO complex

E = -1014.4561727 a.u.

---

| Center<br>Number | Atomic<br>Number | Atomic<br>Type | Coordinates (Angstroms) |           |           |
|------------------|------------------|----------------|-------------------------|-----------|-----------|
|                  |                  |                | X                       | Y         | Z         |
| 1                | 5                | 0              | -0.600988               | 0.180845  | 0.360232  |
| 2                | 6                | 0              | 1.897424                | 0.319266  | -0.797061 |
| 3                | 1                | 0              | 2.873143                | 0.804176  | -0.880741 |
| 4                | 1                | 0              | 1.628264                | -0.019996 | -1.801441 |
| 5                | 6                | 0              | 1.957509                | -0.854629 | 0.169078  |
| 6                | 1                | 0              | 2.502688                | -1.704125 | -0.243924 |
| 7                | 1                | 0              | 2.426138                | -0.567349 | 1.110637  |
| 8                | 7                | 0              | -1.424956               | 0.604989  | 1.667438  |
| 9                | 1                | 0              | -1.932654               | 1.486287  | 1.554087  |
| 10               | 1                | 0              | -2.097299               | -0.108694 | 1.959865  |
| 11               | 1                | 0              | -0.767635               | 0.720436  | 2.441393  |
| 12               | 8                | 0              | -1.833975               | 0.073575  | -0.654974 |
| 13               | 6                | 0              | -1.845284               | -0.611691 | -1.672323 |
| 14               | 1                | 0              | -2.721313               | -0.548832 | -2.318678 |
| 15               | 1                | 0              | -0.998286               | -1.265560 | -1.901604 |
| 16               | 16               | 0              | 0.256166                | -1.453588 | 0.546417  |
| 17               | 15               | 0              | 0.628398                | 1.587268  | -0.274755 |
| 18               | 1                | 0              | 1.155865                | 1.806629  | 1.027458  |

---

### 13-HCHO complex

E = -691.5066133 a.u.

| Center<br>Number | Atomic<br>Number | Atomic<br>Type | Coordinates (Angstroms) |           |           |
|------------------|------------------|----------------|-------------------------|-----------|-----------|
|                  |                  |                | X                       | Y         | Z         |
| 1                | 5                | 0              | -0.453409               | 0.376667  | 0.174756  |
| 2                | 8                | 0              | -0.038410               | -0.483456 | 1.177388  |
| 3                | 6                | 0              | 1.887399                | -0.662561 | -0.261152 |
| 4                | 1                | 0              | 2.967975                | -0.519938 | -0.296350 |
| 5                | 1                | 0              | 1.663721                | -1.567554 | -0.833398 |
| 6                | 6                | 0              | 1.374839                | -0.776856 | 1.170206  |
| 7                | 1                | 0              | 1.500651                | -1.774980 | 1.590960  |
| 8                | 1                | 0              | 1.878226                | -0.058753 | 1.823064  |
| 9                | 7                | 0              | -1.252261               | 1.632081  | 0.778083  |
| 10               | 1                | 0              | -1.743937               | 2.180359  | 0.069548  |
| 11               | 1                | 0              | -1.930646               | 1.336416  | 1.485446  |
| 12               | 1                | 0              | -0.588130               | 2.253134  | 1.244138  |
| 13               | 8                | 0              | -1.698553               | -0.323934 | -0.601849 |
| 14               | 6                | 0              | -1.850857               | -1.539269 | -0.594202 |
| 15               | 1                | 0              | -2.672620               | -1.959829 | -1.176115 |
| 16               | 1                | 0              | -1.174222               | -2.170067 | -0.009935 |
| 17               | 15               | 0              | 1.001739                | 0.768192  | -1.097335 |
| 18               | 1                | 0              | 1.533191                | 1.781657  | -0.251113 |

### 14-HCHO complex

E = -1070.7251365 a.u.

| Center<br>Number | Atomic<br>Number | Atomic<br>Type | Coordinates (Angstroms) |           |           |
|------------------|------------------|----------------|-------------------------|-----------|-----------|
|                  |                  |                | X                       | Y         | Z         |
| 1                | 5                | 0              | -0.565987               | 0.113147  | 0.385844  |
| 2                | 6                | 0              | 1.868105                | 0.512574  | -0.755883 |
| 3                | 1                | 0              | 2.769687                | 1.125461  | -0.727401 |
| 4                | 1                | 0              | 1.661361                | 0.248209  | -1.793523 |
| 5                | 6                | 0              | 2.012793                | -0.721075 | 0.114192  |
| 6                | 1                | 0              | 2.654160                | -1.467732 | -0.355108 |
| 7                | 1                | 0              | 2.419040                | -0.469781 | 1.093459  |
| 8                | 7                | 0              | -1.311286               | 0.407829  | 1.771258  |
| 9                | 1                | 0              | -1.863933               | 1.269234  | 1.753451  |
| 10               | 1                | 0              | -1.925173               | -0.355954 | 2.064305  |
| 11               | 1                | 0              | -0.596308               | 0.518335  | 2.493473  |
| 12               | 8                | 0              | -1.901169               | -0.005871 | -0.537154 |
| 13               | 6                | 0              | -1.868647               | -0.433151 | -1.684592 |
| 14               | 1                | 0              | -2.795550               | -0.433667 | -2.259844 |
| 15               | 1                | 0              | -0.931185               | -0.809005 | -2.105767 |
| 16               | 16               | 0              | 0.496327                | 1.548568  | -0.111731 |
| 17               | 16               | 0              | 0.363216                | -1.495364 | 0.346972  |

### 15-HCHO complex

E = -424.827162 a.u.

| Center<br>Number | Atomic<br>Number | Atomic<br>Type | Coordinates (Angstroms) |           |           |
|------------------|------------------|----------------|-------------------------|-----------|-----------|
|                  |                  |                | X                       | Y         | Z         |
| 1                | 5                | 0              | 0.208435                | 0.446943  | -0.002058 |
| 2                | 8                | 0              | -0.370635               | -0.137388 | -1.116580 |
| 3                | 8                | 0              | -0.631066               | 0.489316  | 1.089704  |
| 4                | 6                | 0              | -1.725872               | -0.389848 | 0.781136  |
| 5                | 1                | 0              | -2.639820               | 0.012371  | 1.213551  |
| 6                | 1                | 0              | -1.530383               | -1.375533 | 1.213758  |
| 7                | 6                | 0              | -1.739473               | -0.427332 | -0.754903 |
| 8                | 1                | 0              | -2.021919               | -1.396572 | -1.163114 |
| 9                | 1                | 0              | -2.384539               | 0.343615  | -1.180121 |
| 10               | 7                | 0              | 0.929718                | 1.846699  | -0.238160 |
| 11               | 1                | 0              | 1.458709                | 2.137073  | 0.587484  |
| 12               | 1                | 0              | 1.557567                | 1.848501  | -1.043601 |
| 13               | 1                | 0              | 0.210353                | 2.554116  | -0.402411 |
| 14               | 8                | 0              | 1.586803                | -0.438915 | 0.378320  |
| 15               | 6                | 0              | 1.722492                | -1.585553 | -0.021002 |
| 16               | 1                | 0              | 2.594417                | -2.154040 | 0.309844  |
| 17               | 1                | 0              | 0.981712                | -2.018846 | -0.700921 |

### 16-HCHO complex

E = -747.7770928 a.u.

| Center<br>Number | Atomic<br>Number | Atomic<br>Type | Coordinates (Angstroms) |           |           |
|------------------|------------------|----------------|-------------------------|-----------|-----------|
|                  |                  |                | X                       | Y         | Z         |
| 1                | 5                | 0              | -0.419267               | 0.356177  | 0.178507  |
| 2                | 8                | 0              | 0.032394                | -0.508321 | 1.159326  |
| 3                | 6                | 0              | 1.908554                | -0.603307 | -0.325377 |
| 4                | 1                | 0              | 2.961867                | -0.340205 | -0.407586 |
| 5                | 1                | 0              | 1.731630                | -1.528334 | -0.875573 |
| 6                | 6                | 0              | 1.457065                | -0.705392 | 1.125724  |
| 7                | 1                | 0              | 1.668446                | -1.682339 | 1.559926  |
| 8                | 1                | 0              | 1.932328                | 0.067105  | 1.735213  |
| 9                | 7                | 0              | -1.136417               | 1.662453  | 0.772807  |
| 10               | 1                | 0              | -1.620228               | 2.214265  | 0.061148  |
| 11               | 1                | 0              | -1.805956               | 1.432704  | 1.511184  |
| 12               | 1                | 0              | -0.415330               | 2.260129  | 1.182646  |
| 13               | 8                | 0              | -1.735212               | -0.318933 | -0.511298 |
| 14               | 6                | 0              | -1.902557               | -1.531691 | -0.497699 |
| 15               | 1                | 0              | -2.765730               | -1.939547 | -1.026377 |
| 16               | 1                | 0              | -1.197504               | -2.174100 | 0.038090  |
| 17               | 16               | 0              | 0.900369                | 0.745790  | -1.067560 |

### 17-HCHO complex

E = -727.8942931 a.u.

| Center<br>Number | Atomic<br>Number | Atomic<br>Type | Coordinates (Angstroms) |           |           |
|------------------|------------------|----------------|-------------------------|-----------|-----------|
|                  |                  |                | X                       | Y         | Z         |
| 1                | 5                | 0              | -0.438637               | 0.379845  | 0.207735  |
| 2                | 6                | 0              | 1.933950                | -0.543866 | -0.361449 |
| 3                | 1                | 0              | 2.939211                | -0.240812 | -0.646536 |
| 4                | 1                | 0              | 1.767785                | -1.569234 | -0.693243 |
| 5                | 6                | 0              | 1.684212                | -0.389543 | 1.132667  |
| 6                | 1                | 0              | 2.072159                | -1.251258 | 1.679505  |
| 7                | 1                | 0              | 2.185370                | 0.510413  | 1.504483  |
| 8                | 7                | 0              | -1.239719               | 1.739392  | 0.506452  |
| 9                | 1                | 0              | -1.733915               | 2.081004  | -0.321321 |
| 10               | 1                | 0              | -1.925557               | 1.659834  | 1.260109  |
| 11               | 1                | 0              | -0.560054               | 2.455821  | 0.769527  |
| 12               | 16               | 0              | 0.729336                | 0.555482  | -1.220265 |
| 13               | 7                | 0              | 0.224925                | -0.289815 | 1.291831  |
| 14               | 1                | 0              | -0.100853               | -0.260496 | 2.248647  |
| 15               | 6                | 0              | -1.767765               | -1.711715 | -0.313385 |
| 16               | 1                | 0              | -2.643582               | -2.263227 | -0.661605 |
| 17               | 1                | 0              | -0.847032               | -2.228024 | -0.020927 |
| 18               | 8                | 0              | -1.828569               | -0.494656 | -0.246007 |

### 18-HCHO complex (hydrogen-bonded)

E = -404.9532897 a.u.

| Center<br>Number | Atomic<br>Number | Atomic<br>Type | Coordinates (Angstroms) |           |           |
|------------------|------------------|----------------|-------------------------|-----------|-----------|
|                  |                  |                | X                       | Y         | Z         |
| 1                | 5                | 0              | 0.611262                | 0.563784  | 0.015759  |
| 2                | 8                | 0              | 1.891323                | 0.975057  | 0.011328  |
| 3                | 6                | 0              | 2.706413                | -0.221872 | -0.113101 |
| 4                | 1                | 0              | 3.491539                | -0.175410 | 0.637720  |
| 5                | 1                | 0              | 3.151865                | -0.208926 | -1.107232 |
| 6                | 6                | 0              | 1.750162                | -1.428977 | 0.083326  |
| 7                | 1                | 0              | 1.886080                | -2.177581 | -0.696885 |
| 8                | 1                | 0              | 1.888712                | -1.903518 | 1.056466  |
| 9                | 7                | 0              | -0.499191               | 1.627045  | 0.041255  |
| 10               | 1                | 0              | -0.410737               | 2.260516  | -0.757480 |
| 11               | 1                | 0              | -1.433677               | 1.180191  | 0.022785  |
| 12               | 1                | 0              | -0.421468               | 2.206130  | 0.881557  |
| 13               | 8                | 0              | -2.601956               | -0.231227 | 0.009854  |
| 14               | 6                | 0              | -3.772395               | -0.527412 | -0.048555 |
| 15               | 1                | 0              | -4.555766               | 0.239895  | -0.131057 |
| 16               | 1                | 0              | -4.089048               | -1.579160 | -0.021199 |
| 17               | 7                | 0              | 0.420144                | -0.799042 | 0.000778  |
| 18               | 1                | 0              | -0.430498               | -1.338152 | 0.042828  |



### 18-HCHO complex

E = -404.9456366 a.u.

| Center<br>Number | Atomic<br>Number | Atomic<br>Type | Coordinates (Angstroms) |           |           |
|------------------|------------------|----------------|-------------------------|-----------|-----------|
|                  |                  |                | X                       | Y         | Z         |
| 1                | 6                | 0              | 1.816245                | 0.403270  | -0.712940 |
| 2                | 6                | 0              | 1.730570                | 0.364551  | 0.818631  |
| 3                | 1                | 0              | 2.788993                | 0.066752  | -1.072245 |
| 4                | 1                | 0              | 1.637892                | 1.416011  | -1.095053 |
| 5                | 1                | 0              | 1.999845                | 1.305710  | 1.294756  |
| 6                | 1                | 0              | 2.344796                | -0.437713 | 1.231483  |
| 7                | 8                | 0              | 0.344844                | 0.068497  | 1.112872  |
| 8                | 7                | 0              | 0.741415                | -0.525894 | -1.088139 |
| 9                | 1                | 0              | 0.565041                | -0.675138 | -2.069095 |
| 10               | 5                | 0              | -0.211825               | -0.488738 | -0.024358 |
| 11               | 7                | 0              | -1.068898               | -1.804331 | 0.247801  |
| 12               | 1                | 0              | -0.419927               | -2.587363 | 0.349282  |
| 13               | 1                | 0              | -1.602496               | -1.728639 | 1.116077  |
| 14               | 1                | 0              | -1.718568               | -2.032266 | -0.506699 |
| 15               | 8                | 0              | -1.598306               | 0.511585  | -0.416750 |
| 16               | 6                | 0              | -1.677410               | 1.647323  | 0.021006  |
| 17               | 1                | 0              | -0.940360               | 2.006045  | 0.747993  |
| 18               | 1                | 0              | -2.492445               | 2.290355  | -0.321493 |

### 19-HCHO complex (hydrogen-bonded)

E = -671.6300092 a.u.

| Center<br>Number | Atomic<br>Number | Atomic<br>Type | Coordinates (Angstroms) |           |           |
|------------------|------------------|----------------|-------------------------|-----------|-----------|
|                  |                  |                | X                       | Y         | Z         |
| 1                | 5                | 0              | -0.348766               | 0.737256  | 0.346295  |
| 2                | 6                | 0              | -1.959471               | -1.102246 | -0.499831 |
| 3                | 1                | 0              | -2.836647               | -1.699496 | -0.253817 |
| 4                | 1                | 0              | -1.422508               | -1.615758 | -1.299835 |
| 5                | 6                | 0              | -2.341833               | 0.312022  | -0.943323 |
| 6                | 1                | 0              | -2.556197               | 0.353420  | -2.012018 |
| 7                | 1                | 0              | -3.219798               | 0.672980  | -0.400573 |
| 8                | 7                | 0              | 0.847277                | 1.596626  | 0.824299  |
| 9                | 1                | 0              | 1.717634                | 1.107681  | 0.529014  |
| 10               | 1                | 0              | 0.865590                | 2.543705  | 0.441230  |
| 11               | 1                | 0              | 0.874453                | 1.670939  | 1.843461  |
| 12               | 7                | 0              | -1.195386               | 1.191345  | -0.629559 |
| 13               | 1                | 0              | -1.170020               | 2.088806  | -1.097219 |
| 14               | 6                | 0              | 3.598091                | -0.785098 | -0.626797 |
| 15               | 1                | 0              | 4.459715                | -0.832537 | 0.055036  |
| 16               | 1                | 0              | 3.612946                | -1.429018 | -1.517202 |
| 17               | 8                | 0              | 2.663685                | -0.051946 | -0.411442 |
| 18               | 15               | 0              | -0.770380               | -1.043370 | 0.959613  |
| 19               | 1                | 0              | -1.679075               | -0.544750 | 1.934321  |

### 19-HCHO complex

E = -671.6211904 a.u.

| Center<br>Number | Atomic<br>Number | Atomic<br>Type | Coordinates (Angstroms) |           |           |
|------------------|------------------|----------------|-------------------------|-----------|-----------|
|                  |                  |                | X                       | Y         | Z         |
| 1                | 6                | 0              | -1.522906               | 0.894707  | 1.011431  |
| 2                | 6                | 0              | -2.157617               | 0.069048  | -0.110376 |
| 3                | 1                | 0              | -2.149681               | 0.888823  | 1.904488  |
| 4                | 1                | 0              | -1.411480               | 1.939720  | 0.697759  |
| 5                | 1                | 0              | -2.950772               | 0.623782  | -0.610429 |
| 6                | 1                | 0              | -2.579083               | -0.851810 | 0.293847  |
| 7                | 15               | 0              | -0.762092               | -0.317166 | -1.311213 |
| 8                | 1                | 0              | -0.974753               | -1.704116 | -1.499030 |
| 9                | 7                | 0              | -0.217365               | 0.280980  | 1.305973  |
| 10               | 1                | 0              | 0.163996                | 0.456853  | 2.225019  |
| 11               | 5                | 0              | 0.439920                | -0.399360 | 0.239695  |
| 12               | 7                | 0              | 1.155681                | -1.780793 | 0.634173  |
| 13               | 1                | 0              | 1.782768                | -1.692026 | 1.437548  |
| 14               | 1                | 0              | 0.431080                | -2.454614 | 0.886566  |
| 15               | 1                | 0              | 1.697976                | -2.180034 | -0.134164 |
| 16               | 8                | 0              | 1.921525                | 0.365794  | -0.213203 |
| 17               | 6                | 0              | 1.919640                | 1.557206  | -0.472681 |
| 18               | 1                | 0              | 0.995574                | 2.140410  | -0.390537 |
| 19               | 1                | 0              | 2.851034                | 2.033873  | -0.786980 |

### 20-HCHO complex (hydrogen-bonded)

E = -385.0756649 a.u.

| Center<br>Number | Atomic<br>Number | Atomic<br>Type | Coordinates (Angstroms) |           |           |
|------------------|------------------|----------------|-------------------------|-----------|-----------|
|                  |                  |                | X                       | Y         | Z         |
| 1                | 5                | 0              | -0.625935               | 0.612188  | 0.000236  |
| 2                | 6                | 0              | -1.673828               | -1.453470 | -0.095907 |
| 3                | 1                | 0              | -1.798919               | -2.256300 | 0.629780  |
| 4                | 1                | 0              | -1.730572               | -1.876866 | -1.101745 |
| 5                | 6                | 0              | -2.736735               | -0.343180 | 0.099747  |
| 6                | 1                | 0              | -3.547600               | -0.434413 | -0.621878 |
| 7                | 1                | 0              | -3.157115               | -0.377187 | 1.107753  |
| 8                | 7                | 0              | 0.511740                | 1.659713  | 0.001087  |
| 9                | 1                | 0              | 1.430888                | 1.181796  | 0.000421  |
| 10               | 1                | 0              | 0.462135                | 2.264904  | -0.821246 |
| 11               | 1                | 0              | 0.466457                | 2.265266  | 0.823376  |
| 12               | 8                | 0              | 2.634297                | -0.198695 | -0.005712 |
| 13               | 6                | 0              | 3.790098                | -0.550592 | 0.003426  |
| 14               | 1                | 0              | 4.054445                | -1.617177 | -0.004636 |
| 15               | 1                | 0              | 4.612534                | 0.179459  | 0.020227  |
| 16               | 7                | 0              | -1.983184               | 0.913276  | -0.092500 |
| 17               | 1                | 0              | -2.471247               | 1.791349  | -0.035853 |
| 18               | 7                | 0              | -0.389703               | -0.752836 | 0.087145  |
| 19               | 1                | 0              | 0.485118                | -1.249829 | 0.034585  |

## 21-HCHO complex

E = -826.3575992 a.u.

---

| Center<br>Number | Atomic<br>Number | Atomic<br>Type | Coordinates (Angstroms) |           |           |
|------------------|------------------|----------------|-------------------------|-----------|-----------|
|                  |                  |                | X                       | Y         | Z         |
| 1                | 6                | 0              | 2.374120                | -1.004222 | -0.327864 |
| 2                | 6                | 0              | 1.781454                | -1.004224 | 1.085943  |
| 3                | 1                | 0              | 2.756971                | -1.987081 | -0.604778 |
| 4                | 1                | 0              | 3.190300                | -0.277169 | -0.415074 |
| 5                | 1                | 0              | 2.494334                | -0.727484 | 1.860681  |
| 6                | 1                | 0              | 1.341601                | -1.974435 | 1.329711  |
| 7                | 7                | 0              | 1.204015                | -0.622627 | -1.129168 |
| 8                | 1                | 0              | 1.306567                | -0.532630 | -2.127547 |
| 9                | 8                | 0              | 0.721579                | -0.019100 | 1.053501  |
| 10               | 5                | 0              | 0.345295                | 0.141677  | -0.276892 |
| 11               | 16               | 0              | -1.601844               | -0.203799 | -0.601871 |
| 12               | 6                | 0              | -2.367320               | 0.716046  | 0.759722  |
| 13               | 1                | 0              | -2.434232               | 1.760439  | 0.459071  |
| 14               | 1                | 0              | -3.371294               | 0.324362  | 0.913885  |
| 15               | 1                | 0              | -1.759264               | 0.597972  | 1.656748  |
| 16               | 6                | 0              | -1.618414               | -1.879036 | 0.086500  |
| 17               | 1                | 0              | -1.208335               | -1.850634 | 1.095561  |
| 18               | 1                | 0              | -2.644329               | -2.241536 | 0.085001  |
| 19               | 1                | 0              | -0.999046               | -2.492448 | -0.565500 |
| 20               | 8                | 0              | 0.324152                | 1.778794  | -0.595289 |
| 21               | 6                | 0              | 0.868432                | 2.570477  | 0.161110  |
| 22               | 1                | 0              | 1.313035                | 2.214974  | 1.095824  |
| 23               | 1                | 0              | 0.893143                | 3.624663  | -0.123159 |

---

## 22-HCHO complex

E = -503.3826523 a.u.

| Center<br>Number | Atomic<br>Number | Atomic<br>Type | Coordinates (Angstroms) |           |           |
|------------------|------------------|----------------|-------------------------|-----------|-----------|
|                  |                  |                | X                       | Y         | Z         |
| 1                | 6                | 0              | -1.733075               | -0.879016 | 1.085894  |
| 2                | 6                | 0              | -1.872506               | -1.298883 | -0.382504 |
| 3                | 1                | 0              | -1.818188               | -1.705919 | 1.787868  |
| 4                | 1                | 0              | -2.467781               | -0.111443 | 1.347914  |
| 5                | 1                | 0              | -2.907481               | -1.253690 | -0.722752 |
| 6                | 1                | 0              | -1.497859               | -2.317373 | -0.536154 |
| 7                | 8                | 0              | -0.413151               | -0.315419 | 1.187147  |
| 8                | 7                | 0              | -1.023254               | -0.296349 | -1.047993 |
| 9                | 1                | 0              | -0.878720               | -0.390798 | -2.041494 |
| 10               | 5                | 0              | -0.054010               | 0.134378  | -0.072140 |
| 11               | 8                | 0              | 1.457781                | -0.116044 | -0.331080 |
| 12               | 6                | 0              | 2.345813                | 0.307784  | 0.754079  |
| 13               | 1                | 0              | 2.140508                | -0.312014 | 1.626101  |
| 14               | 1                | 0              | 3.364167                | 0.186168  | 0.393678  |
| 15               | 1                | 0              | 2.130658                | 1.351638  | 0.954693  |
| 16               | 6                | 0              | 1.738803                | -1.489291 | -0.731384 |
| 17               | 1                | 0              | 2.793699                | -1.537777 | -0.990280 |
| 18               | 1                | 0              | 1.500922                | -2.149790 | 0.103356  |
| 19               | 1                | 0              | 1.121257                | -1.707657 | -1.596292 |
| 20               | 8                | 0              | 0.065732                | 1.798961  | -0.045525 |
| 21               | 6                | 0              | -0.874287               | 2.494352  | -0.395462 |
| 22               | 1                | 0              | -1.773594               | 2.023706  | -0.806943 |
| 23               | 1                | 0              | -0.786148               | 3.577829  | -0.291113 |

## 23-HCHO complex

E = -522.8478599 a.u.

---

| Center<br>Number | Atomic<br>Number | Atomic<br>Type | Coordinates (Angstroms) |           |           |
|------------------|------------------|----------------|-------------------------|-----------|-----------|
|                  |                  |                | X                       | Y         | Z         |
| 1                | 6                | 0              | 2.127259                | -1.125153 | 0.683450  |
| 2                | 6                | 0              | 2.142394                | -0.824305 | -0.820759 |
| 3                | 1                | 0              | 3.079057                | -0.879310 | 1.156566  |
| 4                | 1                | 0              | 1.906940                | -2.181645 | 0.869996  |
| 5                | 1                | 0              | 2.448587                | -1.671329 | -1.431328 |
| 6                | 1                | 0              | 2.790200                | 0.028098  | -1.050267 |
| 7                | 7                | 0              | 1.031294                | -0.254763 | 1.143812  |
| 8                | 1                | 0              | 0.750263                | -0.338611 | 2.107764  |
| 9                | 8                | 0              | 0.786333                | -0.479564 | -1.147263 |
| 10               | 5                | 0              | 0.185532                | -0.008778 | 0.005461  |
| 11               | 7                | 0              | -1.374126               | -0.260504 | 0.025331  |
| 12               | 6                | 0              | -2.052477               | 0.435261  | 1.153435  |
| 13               | 1                | 0              | -1.953758               | 1.511427  | 1.026523  |
| 14               | 1                | 0              | -3.108775               | 0.163908  | 1.153566  |
| 15               | 1                | 0              | -1.600776               | 0.123055  | 2.094619  |
| 16               | 6                | 0              | -1.553407               | -1.739029 | 0.182933  |
| 17               | 1                | 0              | -2.619513               | -1.966794 | 0.173894  |
| 18               | 1                | 0              | -1.053361               | -2.238106 | -0.644922 |
| 19               | 1                | 0              | -1.112568               | -2.052753 | 1.127909  |
| 20               | 6                | 0              | -1.998789               | 0.154237  | -1.271134 |
| 21               | 1                | 0              | -3.047454               | -0.144871 | -1.261437 |
| 22               | 1                | 0              | -1.918684               | 1.233119  | -1.377469 |
| 23               | 1                | 0              | -1.468469               | -0.339263 | -2.082899 |
| 24               | 8                | 0              | 0.105566                | 1.799337  | -0.221380 |
| 25               | 6                | 0              | 1.052280                | 2.478982  | 0.124449  |
| 26               | 1                | 0              | 1.873883                | 2.022651  | 0.690175  |
| 27               | 1                | 0              | 1.067845                | 3.543036  | -0.129096 |

---

## 24-HCHO complex

E = -809.4543222 a.u.

---

| Center<br>Number | Atomic<br>Number | Atomic<br>Type | Coordinates (Angstroms) |           |           |
|------------------|------------------|----------------|-------------------------|-----------|-----------|
|                  |                  |                | X                       | Y         | Z         |
| 1                | 6                | 0              | 2.621586                | -1.057252 | 0.691123  |
| 2                | 6                | 0              | 2.504798                | -0.935281 | -0.841505 |
| 3                | 1                | 0              | 3.172881                | -0.220186 | 1.129153  |
| 4                | 1                | 0              | 3.107073                | -1.987893 | 0.984783  |
| 5                | 1                | 0              | 2.553762                | -1.909819 | -1.329043 |
| 6                | 1                | 0              | 3.254746                | -0.278259 | -1.278406 |
| 7                | 7                | 0              | 1.209008                | -1.020657 | 1.106485  |
| 8                | 1                | 0              | 0.966376                | -1.149507 | 2.074555  |
| 9                | 8                | 0              | 1.191059                | -0.378989 | -1.100987 |
| 10               | 5                | 0              | 0.464309                | -0.525764 | 0.042069  |
| 11               | 15               | 0              | -1.448871               | -0.231566 | -0.026216 |
| 12               | 6                | 0              | -2.276978               | -1.822808 | -0.303560 |
| 13               | 1                | 0              | -3.356671               | -1.671408 | -0.351246 |
| 14               | 1                | 0              | -1.931414               | -2.254845 | -1.244048 |
| 15               | 1                | 0              | -2.043609               | -2.509348 | 0.511246  |
| 16               | 6                | 0              | -2.093614               | 0.468628  | 1.512729  |
| 17               | 1                | 0              | -1.602034               | 1.422559  | 1.703253  |
| 18               | 1                | 0              | -3.171190               | 0.615253  | 1.420154  |
| 19               | 1                | 0              | -1.898842               | -0.217250 | 2.338750  |
| 20               | 6                | 0              | -1.874772               | 0.851063  | -1.410416 |
| 21               | 1                | 0              | -2.955064               | 0.837877  | -1.563376 |
| 22               | 1                | 0              | -1.545017               | 1.865091  | -1.189327 |
| 23               | 1                | 0              | -1.370371               | 0.493505  | -2.309355 |
| 24               | 8                | 0              | 0.390715                | 2.095855  | 0.422190  |
| 25               | 6                | 0              | 1.364004                | 2.619977  | -0.057607 |
| 26               | 1                | 0              | 1.968634                | 2.099025  | -0.818867 |
| 27               | 1                | 0              | 1.674868                | 3.631220  | 0.245060  |

---

## 25-HCHO complex

E = -691.4765369 a.u.

---

| Center<br>Number | Atomic<br>Number | Atomic<br>Type | Coordinates (Angstroms) |           |           |
|------------------|------------------|----------------|-------------------------|-----------|-----------|
|                  |                  |                | X                       | Y         | Z         |
| 1                | 6                | 0              | -2.014646               | -0.886341 | -0.515595 |
| 2                | 6                | 0              | -1.979055               | -0.107104 | 0.805124  |
| 3                | 1                | 0              | -2.905256               | -0.645333 | -1.096992 |
| 4                | 1                | 0              | -1.994493               | -1.967235 | -0.340018 |
| 5                | 1                | 0              | -2.386550               | -0.658600 | 1.649481  |
| 6                | 1                | 0              | -2.499365               | 0.849998  | 0.712756  |
| 7                | 7                | 0              | -0.790974               | -0.410273 | -1.172137 |
| 8                | 1                | 0              | -0.584897               | -0.715703 | -2.108894 |
| 9                | 8                | 0              | -0.577134               | 0.155429  | 1.059925  |
| 10               | 5                | 0              | 0.100043                | 0.038211  | -0.147595 |
| 11               | 15               | 0              | 1.778079                | -1.143149 | 0.184864  |
| 12               | 1                | 0              | 2.683277                | -0.792057 | 1.196412  |
| 13               | 1                | 0              | 1.346288                | -2.416069 | 0.575130  |
| 14               | 1                | 0              | 2.616303                | -1.412693 | -0.905690 |
| 15               | 8                | 0              | 0.850416                | 1.442859  | -0.540395 |
| 16               | 6                | 0              | 0.517788                | 2.481363  | 0.014397  |
| 17               | 1                | 0              | -0.235864               | 2.460475  | 0.807873  |
| 18               | 1                | 0              | 0.995196                | 3.411500  | -0.299871 |

---

## 26-HCHO complex

E = -956.7185318 a.u.

| Center<br>Number | Atomic<br>Number | Atomic<br>Type | Coordinates (Angstroms) |           |           |
|------------------|------------------|----------------|-------------------------|-----------|-----------|
|                  |                  |                | X                       | Y         | Z         |
| 1                | 6                | 0              | -2.999506               | 1.247473  | -0.197067 |
| 2                | 6                | 0              | -2.915099               | -0.021653 | -1.069553 |
| 3                | 1                | 0              | -3.776790               | 1.159437  | 0.562935  |
| 4                | 1                | 0              | -3.194150               | 2.141219  | -0.795179 |
| 5                | 1                | 0              | -3.392787               | 0.093355  | -2.040075 |
| 6                | 1                | 0              | -3.337286               | -0.890038 | -0.559474 |
| 7                | 7                | 0              | -1.653320               | 1.296107  | 0.394991  |
| 8                | 1                | 0              | -1.426320               | 2.019910  | 1.056665  |
| 9                | 8                | 0              | -1.508188               | -0.275493 | -1.273659 |
| 10               | 5                | 0              | -0.825530               | 0.443010  | -0.339728 |
| 11               | 6                | 0              | 0.748609                | 0.342709  | -0.231001 |
| 12               | 16               | 0              | 1.705825                | 1.516439  | 0.533911  |
| 13               | 6                | 0              | 2.849104                | -0.515649 | -0.427355 |
| 14               | 6                | 0              | 3.139818                | 0.622798  | 0.239647  |
| 15               | 1                | 0              | 3.535885                | -1.279495 | -0.758444 |
| 16               | 1                | 0              | 4.107403                | 0.976577  | 0.558655  |
| 17               | 7                | 0              | 1.501416                | -0.652261 | -0.686152 |
| 18               | 6                | 0              | 0.952741                | -1.838072 | -1.376550 |
| 19               | 1                | 0              | 1.789316                | -2.454663 | -1.694429 |
| 20               | 1                | 0              | 0.320051                | -2.378759 | -0.675453 |
| 21               | 1                | 0              | 0.367084                | -1.513011 | -2.232184 |
| 22               | 8                | 0              | -0.536377               | -1.580043 | 1.390303  |
| 23               | 6                | 0              | -1.329583               | -1.625562 | 2.294074  |
| 24               | 1                | 0              | -2.072066               | -0.821890 | 2.439204  |
| 25               | 1                | 0              | -1.342548               | -2.465618 | 3.005647  |



## 27-HCHO complex

E = -653.2058751 a.u.

---

| Center<br>Number | Atomic<br>Number | Atomic<br>Type | Coordinates (Angstroms) |           |           |
|------------------|------------------|----------------|-------------------------|-----------|-----------|
|                  |                  |                | X                       | Y         | Z         |
| 1                | 6                | 0              | 2.993853                | -0.226014 | 1.182425  |
| 2                | 6                | 0              | 2.889421                | -0.967111 | -0.165357 |
| 3                | 1                | 0              | 3.735295                | 0.572648  | 1.143055  |
| 4                | 1                | 0              | 3.249389                | -0.903159 | 2.001558  |
| 5                | 1                | 0              | 3.404307                | -1.925700 | -0.168479 |
| 6                | 1                | 0              | 3.263358                | -0.354297 | -0.987852 |
| 7                | 7                | 0              | 1.630332                | 0.298713  | 1.346046  |
| 8                | 1                | 0              | 1.408643                | 0.848416  | 2.158376  |
| 9                | 8                | 0              | 1.482243                | -1.193457 | -0.392176 |
| 10               | 5                | 0              | 0.794246                | -0.357297 | 0.440545  |
| 11               | 6                | 0              | -2.881649               | 0.404160  | 0.437690  |
| 12               | 6                | 0              | -2.871514               | -0.803022 | -0.186034 |
| 13               | 1                | 0              | -3.695258               | 1.066847  | 0.678801  |
| 14               | 1                | 0              | -3.675188               | -1.394879 | -0.589888 |
| 15               | 6                | 0              | -0.775796               | -0.292615 | 0.338707  |
| 16               | 7                | 0              | -1.579650               | 0.698612  | 0.754826  |
| 17               | 7                | 0              | -1.563466               | -1.215778 | -0.236826 |
| 18               | 8                | 0              | 0.411738                | 1.735118  | -1.346577 |
| 19               | 6                | 0              | 0.852263                | 2.108331  | -2.402227 |
| 20               | 1                | 0              | 1.469719                | 1.447742  | -3.032867 |
| 21               | 1                | 0              | 0.656801                | 3.124255  | -2.781081 |
| 22               | 6                | 0              | -1.136226               | 1.922717  | 1.423867  |
| 23               | 1                | 0              | -0.227634               | 2.274258  | 0.938855  |
| 24               | 1                | 0              | -1.915851               | 2.672842  | 1.312405  |
| 25               | 1                | 0              | -0.971433               | 1.727744  | 2.483880  |
| 26               | 6                | 0              | -1.108692               | -2.460764 | -0.868776 |
| 27               | 1                | 0              | -0.658903               | -2.238374 | -1.834490 |
| 28               | 1                | 0              | -0.372242               | -2.943186 | -0.232068 |
| 29               | 1                | 0              | -1.974554               | -3.106873 | -0.992990 |

---

## 28-HCHO complex

E = -806.8309559 a.u.

---

| Center<br>Number | Atomic<br>Number | Atomic<br>Type | Coordinates (Angstroms) |           |           |
|------------------|------------------|----------------|-------------------------|-----------|-----------|
|                  |                  |                | X                       | Y         | Z         |
| 1                | 6                | 0              | 3.869200                | -0.176519 | 1.344413  |
| 2                | 6                | 0              | 3.853846                | -0.800343 | -0.063282 |
| 3                | 1                | 0              | 4.614145                | 0.615660  | 1.423211  |
| 4                | 1                | 0              | 4.063959                | -0.922904 | 2.118936  |
| 5                | 1                | 0              | 4.390246                | -1.744911 | -0.123558 |
| 6                | 1                | 0              | 4.256307                | -0.106056 | -0.804683 |
| 7                | 7                | 0              | 2.498181                | 0.341483  | 1.454782  |
| 8                | 1                | 0              | 2.210701                | 0.810533  | 2.297759  |
| 9                | 8                | 0              | 2.464048                | -1.030715 | -0.385350 |
| 10               | 5                | 0              | 1.721081                | -0.249249 | 0.458005  |
| 11               | 6                | 0              | -1.943717               | 0.590313  | 0.306055  |
| 12               | 6                | 0              | -1.975872               | -0.766614 | -0.012659 |
| 13               | 6                | 0              | 0.145136                | -0.177530 | 0.323391  |
| 14               | 7                | 0              | -0.658651               | -1.204041 | 0.003929  |
| 15               | 7                | 0              | -0.610219               | 0.914629  | 0.511637  |
| 16               | 6                | 0              | -0.262657               | -2.585131 | -0.265874 |
| 17               | 1                | 0              | -0.680616               | -3.236117 | 0.502288  |
| 18               | 1                | 0              | -0.645540               | -2.875792 | -1.244075 |
| 19               | 1                | 0              | 0.821686                | -2.651346 | -0.269746 |
| 20               | 6                | 0              | -0.146434               | 2.267602  | 0.809986  |
| 21               | 1                | 0              | -0.525665               | 2.942969  | 0.043545  |
| 22               | 1                | 0              | -0.514345               | 2.568034  | 1.791633  |
| 23               | 1                | 0              | 0.938871                | 2.288013  | 0.780813  |
| 24               | 6                | 0              | -3.171363               | -1.433512 | -0.276249 |
| 25               | 1                | 0              | -3.198305               | -2.488176 | -0.519682 |
| 26               | 6                | 0              | -3.105410               | 1.358250  | 0.371251  |
| 27               | 1                | 0              | -3.083309               | 2.412256  | 0.617765  |
| 28               | 6                | 0              | -4.292482               | 0.698307  | 0.107986  |
| 29               | 1                | 0              | -5.223537               | 1.249298  | 0.147735  |
| 30               | 6                | 0              | -4.325251               | -0.673277 | -0.208391 |
| 31               | 1                | 0              | -5.280708               | -1.143787 | -0.402978 |
| 32               | 8                | 0              | 1.536779                | 1.551451  | -1.545605 |
| 33               | 6                | 0              | 2.036987                | 1.191874  | -2.579505 |
| 34               | 1                | 0              | 2.501772                | 0.195330  | -2.668565 |
| 35               | 1                | 0              | 2.045223                | 1.842324  | -3.467948 |

---

## 29-HCHO hydrogen-bonded

E = -675.2829898 a.u.

| Center<br>Number | Atomic<br>Number | Atomic<br>Type | Coordinates (Angstroms) |           |           |
|------------------|------------------|----------------|-------------------------|-----------|-----------|
|                  |                  |                | X                       | Y         | Z         |
| 1                | 6                | 0              | 3.187040                | 0.835561  | -0.198137 |
| 2                | 6                | 0              | 3.387813                | -0.615969 | 0.305535  |
| 3                | 1                | 0              | 3.753195                | 1.024172  | -1.110669 |
| 4                | 1                | 0              | 3.482776                | 1.571038  | 0.554116  |
| 5                | 1                | 0              | 4.018881                | -0.676374 | 1.189516  |
| 6                | 1                | 0              | 3.795479                | -1.262866 | -0.472394 |
| 7                | 7                | 0              | 1.737997                | 0.882906  | -0.434160 |
| 8                | 1                | 0              | 1.271498                | 1.697873  | -0.802750 |
| 9                | 8                | 0              | 2.072835                | -1.118725 | 0.645991  |
| 10               | 5                | 0              | 1.174570                | -0.241867 | 0.138335  |
| 11               | 6                | 0              | -1.048609               | -0.000979 | 1.211538  |
| 12               | 6                | 0              | -0.846697               | -1.375361 | -0.724336 |
| 13               | 6                | 0              | -2.403257               | -0.279622 | 1.279972  |
| 14               | 6                | 0              | -2.200975               | -1.655152 | -0.679697 |
| 15               | 6                | 0              | -2.982511               | -1.106974 | 0.328881  |
| 16               | 1                | 0              | -2.988384               | 0.152616  | 2.080514  |
| 17               | 1                | 0              | -2.627614               | -2.309240 | -1.428057 |
| 18               | 1                | 0              | -4.042010               | -1.330555 | 0.375787  |
| 19               | 7                | 0              | -0.310452               | -0.555204 | 0.217359  |
| 20               | 6                | 0              | -0.353655               | 0.897155  | 2.185105  |
| 21               | 1                | 0              | 0.551020                | 0.425916  | 2.577606  |
| 22               | 1                | 0              | -0.070988               | 1.827128  | 1.685739  |
| 23               | 1                | 0              | -1.013014               | 1.130181  | 3.018575  |
| 24               | 6                | 0              | 0.069369                | -1.944161 | -1.763105 |
| 25               | 1                | 0              | 0.574219                | -1.145017 | -2.312251 |
| 26               | 1                | 0              | 0.832978                | -2.568154 | -1.291668 |
| 27               | 1                | 0              | -0.494088               | -2.551106 | -2.468225 |
| 28               | 8                | 0              | -0.859051               | 2.256845  | -0.819293 |
| 29               | 6                | 0              | -1.595698               | 3.065794  | -1.322467 |
| 30               | 1                | 0              | -1.226094               | 3.813794  | -2.041359 |
| 31               | 1                | 0              | -2.670709               | 3.089306  | -1.081864 |

#### 4-Cl<sup>-</sup> complex

E = -542.8504246 a.u.

| Center<br>Number | Atomic<br>Number | Atomic<br>Type | Coordinates (Angstroms) |           |           |
|------------------|------------------|----------------|-------------------------|-----------|-----------|
|                  |                  |                | X                       | Y         | Z         |
| 1                | 5                | 0              | 0.000000                | 0.930627  | 0.000000  |
| 2                | 1                | 0              | -0.161850               | 1.537693  | 1.017968  |
| 3                | 1                | 0              | -0.161850               | 1.537693  | -1.017968 |
| 4                | 7                | 0              | 1.552552                | 0.425928  | 0.000000  |
| 5                | 1                | 0              | 1.730959                | -0.149108 | -0.821802 |
| 6                | 1                | 0              | 2.203220                | 1.209117  | 0.000000  |
| 7                | 1                | 0              | 1.730959                | -0.149108 | 0.821802  |
| 8                | 17               | 0              | -0.953488               | -0.683583 | 0.000000  |

#### 5-Cl<sup>-</sup> complex

E = -741.4835101 a.u.

| Center<br>Number | Atomic<br>Number | Atomic<br>Type | Coordinates (Angstroms) |           |           |
|------------------|------------------|----------------|-------------------------|-----------|-----------|
|                  |                  |                | X                       | Y         | Z         |
| 1                | 5                | 0              | -0.335558               | -0.178683 | 0.000000  |
| 2                | 9                | 0              | -0.846184               | -0.711989 | 1.150464  |
| 3                | 9                | 0              | -0.846184               | -0.711989 | -1.150464 |
| 4                | 7                | 0              | -0.846184               | 1.385215  | 0.000000  |
| 5                | 1                | 0              | -0.497214               | 1.865749  | -0.827224 |
| 6                | 1                | 0              | -1.865251               | 1.417501  | 0.000000  |
| 7                | 1                | 0              | -0.497214               | 1.865749  | 0.827224  |
| 8                | 17               | 0              | 1.511298                | -0.066840 | 0.000000  |

#### 6-Cl<sup>-</sup> complex

E = -1462.1566323 a.u.

| Center<br>Number | Atomic<br>Number | Atomic<br>Type | Coordinates (Angstroms) |           |           |
|------------------|------------------|----------------|-------------------------|-----------|-----------|
|                  |                  |                | X                       | Y         | Z         |
| 1                | 5                | 0              | 0.000000                | 0.000000  | 0.108667  |
| 2                | 7                | 0              | 0.000000                | 0.000000  | 1.725497  |
| 3                | 1                | 0              | -0.830566               | 0.479527  | 2.074575  |
| 4                | 1                | 0              | 0.000000                | -0.959055 | 2.074575  |
| 5                | 1                | 0              | 0.830566                | 0.479527  | 2.074575  |
| 6                | 17               | 0              | 0.000000                | 1.769103  | -0.369520 |
| 7                | 17               | 0              | -1.532088               | -0.884551 | -0.369520 |
| 8                | 17               | 0              | 1.532088                | -0.884551 | -0.369520 |

### 7-Cl<sup>-</sup> complex

E = -621.4867284 a.u.

| Center<br>Number | Atomic<br>Number | Atomic<br>Type | Coordinates (Angstroms) |           |           |
|------------------|------------------|----------------|-------------------------|-----------|-----------|
|                  |                  |                | X                       | Y         | Z         |
| 1                | 5                | 0              | -0.340511               | -0.157815 | 0.000000  |
| 2                | 7                | 0              | -0.843362               | 1.413570  | 0.000000  |
| 3                | 1                | 0              | -1.859950               | 1.479543  | 0.000000  |
| 4                | 1                | 0              | -0.481549               | 1.891999  | 0.823637  |
| 5                | 1                | 0              | -0.481549               | 1.891999  | -0.823637 |
| 6                | 6                | 0              | -0.843362               | -0.819053 | -1.365700 |
| 7                | 1                | 0              | -0.458900               | -1.838891 | -1.446937 |
| 8                | 1                | 0              | -1.937546               | -0.889393 | -1.409901 |
| 9                | 1                | 0              | -0.501457               | -0.282221 | -2.257330 |
| 10               | 6                | 0              | -0.843362               | -0.819053 | 1.365700  |
| 11               | 1                | 0              | -0.458900               | -1.838891 | 1.446937  |
| 12               | 1                | 0              | -0.501457               | -0.282221 | 2.257330  |
| 13               | 1                | 0              | -1.937546               | -0.889393 | 1.409901  |
| 14               | 17               | 0              | 1.549723                | 0.087070  | 0.000000  |

### 8-Cl<sup>-</sup> complex

E = -1304.1525343 a.u.

| Center<br>Number | Atomic<br>Number | Atomic<br>Type | Coordinates (Angstroms) |           |           |
|------------------|------------------|----------------|-------------------------|-----------|-----------|
|                  |                  |                | X                       | Y         | Z         |
| 1                | 5                | 0              | -0.604232               | -0.052515 | 0.162278  |
| 2                | 6                | 0              | 2.090830                | 0.762480  | -0.412023 |
| 3                | 1                | 0              | 2.956993                | 1.336623  | -0.078906 |
| 4                | 1                | 0              | 2.113018                | 0.724971  | -1.503335 |
| 5                | 6                | 0              | 2.122713                | -0.660944 | 0.157237  |
| 6                | 1                | 0              | 3.009572                | -1.198140 | -0.185185 |
| 7                | 1                | 0              | 2.166977                | -0.627529 | 1.251350  |
| 8                | 15               | 0              | 0.503263                | 1.593720  | 0.163961  |
| 9                | 1                | 0              | 0.057861                | 2.135795  | -1.060393 |
| 10               | 7                | 0              | -1.042614               | -0.294799 | 1.715346  |
| 11               | 1                | 0              | -1.577774               | 0.506418  | 2.055548  |
| 12               | 1                | 0              | -1.625943               | -1.127556 | 1.798425  |
| 13               | 1                | 0              | -0.225364               | -0.406914 | 2.314594  |
| 14               | 15               | 0              | 0.565149                | -1.510923 | -0.470977 |
| 15               | 1                | 0              | 0.377786                | -2.436817 | 0.597240  |
| 16               | 17               | 0              | -2.249477               | 0.092244  | -0.698481 |

### 9-Cl<sup>-</sup> complex

E = -813.1953111 a.u.

| Center<br>Number | Atomic<br>Number | Atomic<br>Type | Coordinates (Angstroms) |           |           |
|------------------|------------------|----------------|-------------------------|-----------|-----------|
|                  |                  |                | X                       | Y         | Z         |
| 1                | 5                | 0              | 1.207064                | 0.366472  | 0.046515  |
| 2                | 7                | 0              | 1.567018                | 0.238139  | 1.652740  |
| 3                | 1                | 0              | 1.095494                | 0.968130  | 2.185302  |
| 4                | 1                | 0              | 1.257543                | -0.667554 | 2.003940  |
| 5                | 1                | 0              | 2.573116                | 0.310801  | 1.798990  |
| 6                | 6                | 0              | -0.379094               | 0.131317  | -0.044750 |
| 7                | 6                | 0              | -0.952480               | -1.135138 | 0.142129  |
| 8                | 6                | 0              | -1.254874               | 1.205659  | -0.240940 |
| 9                | 6                | 0              | -2.330880               | -1.319477 | 0.145588  |
| 10               | 1                | 0              | -0.303257               | -1.999334 | 0.254122  |
| 11               | 6                | 0              | -2.637339               | 1.031726  | -0.244454 |
| 12               | 1                | 0              | -0.853281               | 2.200026  | -0.408249 |
| 13               | 6                | 0              | -3.179503               | -0.232551 | -0.045659 |
| 14               | 1                | 0              | -2.744896               | -2.312094 | 0.284230  |
| 15               | 1                | 0              | -3.290194               | 1.881816  | -0.408138 |
| 16               | 1                | 0              | -4.254177               | -0.373522 | -0.050034 |
| 17               | 6                | 0              | 1.790044                | 1.765351  | -0.459077 |
| 18               | 1                | 0              | 1.354295                | 2.623594  | 0.067117  |
| 19               | 1                | 0              | 2.877119                | 1.822719  | -0.343320 |
| 20               | 1                | 0              | 1.577333                | 1.900926  | -1.522605 |
| 21               | 17               | 0              | 2.198307                | -1.090362 | -0.657655 |

**10-Cl<sup>-</sup> complex**

E = -1004.9028623 a.u.

| Center<br>Number | Atomic<br>Number | Atomic<br>Type | Coordinates (Angstroms) |           |           |
|------------------|------------------|----------------|-------------------------|-----------|-----------|
|                  |                  |                | X                       | Y         | Z         |
| 1                | 5                | 0              | 0.028803                | 0.818708  | 0.246489  |
| 2                | 7                | 0              | 0.061974                | 1.309396  | 1.818838  |
| 3                | 1                | 0              | -0.021563               | 0.513018  | 2.449576  |
| 4                | 1                | 0              | 0.932024                | 1.799048  | 2.024755  |
| 5                | 1                | 0              | -0.716485               | 1.945322  | 1.989879  |
| 6                | 6                | 0              | -1.380120               | 0.071953  | 0.068898  |
| 7                | 6                | 0              | -1.667484               | -1.053633 | 0.858172  |
| 8                | 6                | 0              | -2.370087               | 0.493299  | -0.823537 |
| 9                | 6                | 0              | -2.884725               | -1.721081 | 0.772055  |
| 10               | 1                | 0              | -0.912575               | -1.443517 | 1.539780  |
| 11               | 6                | 0              | -3.589245               | -0.173026 | -0.924533 |
| 12               | 1                | 0              | -2.180533               | 1.357904  | -1.449459 |
| 13               | 6                | 0              | -3.853038               | -1.278744 | -0.124655 |
| 14               | 1                | 0              | -3.075233               | -2.588109 | 1.394594  |
| 15               | 1                | 0              | -4.335742               | 0.175624  | -1.629354 |
| 16               | 1                | 0              | -4.802509               | -1.795884 | -0.201181 |
| 17               | 6                | 0              | 1.362580                | -0.042653 | 0.009445  |
| 18               | 6                | 0              | 2.623564                | 0.514012  | 0.271382  |
| 19               | 6                | 0              | 1.331492                | -1.358610 | -0.462678 |
| 20               | 6                | 0              | 3.796315                | -0.209923 | 0.094143  |
| 21               | 1                | 0              | 2.697927                | 1.555819  | 0.577173  |
| 22               | 6                | 0              | 2.501642                | -2.091306 | -0.652899 |
| 23               | 1                | 0              | 0.377114                | -1.817715 | -0.697295 |
| 24               | 6                | 0              | 3.736632                | -1.522224 | -0.367658 |
| 25               | 1                | 0              | 4.756120                | 0.251111  | 0.298544  |
| 26               | 1                | 0              | 2.446805                | -3.107130 | -1.027784 |
| 27               | 1                | 0              | 4.648178                | -2.089735 | -0.515132 |
| 28               | 17               | 0              | 0.115499                | 2.483326  | -0.648660 |

### 11-Cl<sup>-</sup> complex

E = -923.2065699 a.u.

| Center<br>Number | Atomic<br>Number | Atomic<br>Type | Coordinates (Angstroms) |           |           |
|------------------|------------------|----------------|-------------------------|-----------|-----------|
|                  |                  |                | X                       | Y         | Z         |
| 1                | 6                | 0              | -0.057612               | 0.782017  | 0.698556  |
| 2                | 6                | 0              | -0.057612               | 0.782017  | -0.698556 |
| 3                | 6                | 0              | -0.059490               | 1.954942  | -1.420809 |
| 4                | 6                | 0              | -0.063925               | 3.153751  | -0.694808 |
| 5                | 6                | 0              | -0.063925               | 3.153751  | 0.694808  |
| 6                | 6                | 0              | -0.059490               | 1.954942  | 1.420809  |
| 7                | 1                | 0              | -0.052562               | 1.939802  | -2.503048 |
| 8                | 1                | 0              | -0.064476               | 4.095158  | -1.230127 |
| 9                | 1                | 0              | -0.064476               | 4.095158  | 1.230127  |
| 10               | 1                | 0              | -0.052562               | 1.939802  | 2.503048  |
| 11               | 8                | 0              | -0.057612               | -0.501047 | -1.166967 |
| 12               | 8                | 0              | -0.057612               | -0.501047 | 1.166967  |
| 13               | 5                | 0              | -0.071265               | -1.341493 | 0.000000  |
| 14               | 7                | 0              | -1.518655               | -2.128104 | 0.000000  |
| 15               | 1                | 0              | -1.596751               | -2.716657 | -0.827936 |
| 16               | 1                | 0              | -1.596751               | -2.716657 | 0.827936  |
| 17               | 1                | 0              | -2.278974               | -1.448791 | 0.000000  |
| 18               | 17               | 0              | 1.163976                | -2.720905 | 0.000000  |

### 12-Cl<sup>-</sup> complex

E = -1360.4227621 a.u.

| Center<br>Number | Atomic<br>Number | Atomic<br>Type | Coordinates (Angstroms) |           |           |
|------------------|------------------|----------------|-------------------------|-----------|-----------|
|                  |                  |                | X                       | Y         | Z         |
| 1                | 5                | 0              | 0.585068                | 0.027049  | 0.151240  |
| 2                | 6                | 0              | -2.132528               | 0.621463  | 0.171830  |
| 3                | 1                | 0              | -3.024673               | 1.134947  | -0.194533 |
| 4                | 1                | 0              | -2.203375               | 0.556250  | 1.260960  |
| 5                | 6                | 0              | -2.046047               | -0.779084 | -0.426129 |
| 6                | 1                | 0              | -2.837095               | -1.428988 | -0.051419 |
| 7                | 1                | 0              | -2.124508               | -0.736992 | -1.514157 |
| 8                | 7                | 0              | 1.013894                | 0.147558  | 1.724173  |
| 9                | 1                | 0              | 1.557281                | -0.673680 | 1.995400  |
| 10               | 1                | 0              | 1.585199                | 0.976214  | 1.890746  |
| 11               | 1                | 0              | 0.181946                | 0.183435  | 2.311728  |
| 12               | 15               | 0              | -0.583932               | 1.523256  | -0.395424 |
| 13               | 1                | 0              | -0.396722               | 2.353418  | 0.746755  |
| 14               | 16               | 0              | -0.440327               | -1.562798 | 0.002100  |
| 15               | 17               | 0              | 2.242060                | -0.025360 | -0.696902 |



### 13-Cl<sup>-</sup> complex

E = -1037.4697067 a.u.

| Center<br>Number | Atomic<br>Number | Atomic<br>Type | Coordinates (Angstroms) |           |           |
|------------------|------------------|----------------|-------------------------|-----------|-----------|
|                  |                  |                | X                       | Y         | Z         |
| 1                | 5                | 0              | 0.449476                | 0.201286  | 0.188582  |
| 2                | 6                | 0              | -1.982210               | -0.351407 | -0.574263 |
| 3                | 1                | 0              | -3.048908               | -0.510244 | -0.413966 |
| 4                | 1                | 0              | -1.696822               | -0.782416 | -1.535318 |
| 5                | 6                | 0              | -1.639100               | 1.137994  | -0.544560 |
| 6                | 1                | 0              | -1.920669               | 1.635457  | -1.474972 |
| 7                | 1                | 0              | -2.168844               | 1.633086  | 0.279157  |
| 8                | 7                | 0              | 1.300854                | 0.808179  | 1.444607  |
| 9                | 1                | 0              | 1.915703                | 0.110645  | 1.859088  |
| 10               | 1                | 0              | 1.873024                | 1.577003  | 1.093825  |
| 11               | 1                | 0              | 0.666955                | 1.165588  | 2.157815  |
| 12               | 15               | 0              | -0.930537               | -1.090230 | 0.797867  |
| 13               | 1                | 0              | -0.472487               | -2.247422 | 0.132897  |
| 14               | 8                | 0              | -0.238844               | 1.305075  | -0.360479 |
| 15               | 17               | 0              | 1.829138                | -0.473651 | -0.913231 |

### 14-Cl<sup>-</sup> complex

E = -1416.6959521 a.u.

| Center<br>Number | Atomic<br>Number | Atomic<br>Type | Coordinates (Angstroms) |           |           |
|------------------|------------------|----------------|-------------------------|-----------|-----------|
|                  |                  |                | X                       | Y         | Z         |
| 1                | 5                | 0              | -0.569186               | 0.003059  | 0.172917  |
| 2                | 6                | 0              | 2.093097                | -0.696424 | 0.086324  |
| 3                | 1                | 0              | 2.854380                | -1.311854 | -0.396476 |
| 4                | 1                | 0              | 2.330438                | -0.617518 | 1.149299  |
| 5                | 6                | 0              | 2.012505                | 0.680832  | -0.548749 |
| 6                | 1                | 0              | 2.883428                | 1.287902  | -0.296655 |
| 7                | 1                | 0              | 1.935383                | 0.597401  | -1.633379 |
| 8                | 7                | 0              | -1.124548               | -0.056799 | 1.710114  |
| 9                | 1                | 0              | -1.682933               | 0.769097  | 1.929105  |
| 10               | 1                | 0              | -1.705900               | -0.884542 | 1.842730  |
| 11               | 1                | 0              | -0.334334               | -0.096340 | 2.352555  |
| 12               | 16               | 0              | 0.483737                | -1.533762 | -0.150440 |
| 13               | 16               | 0              | 0.529611                | 1.547684  | 0.077642  |
| 14               | 17               | 0              | -2.141757               | 0.029939  | -0.814309 |

### 15-Cl<sup>-</sup> complex

E = -770.7889313 a.u.

| Center<br>Number | Atomic<br>Number | Atomic<br>Type | Coordinates (Angstroms) |           |           |
|------------------|------------------|----------------|-------------------------|-----------|-----------|
|                  |                  |                | X                       | Y         | Z         |
| 1                | 5                | 0              | 0.228647                | 0.242846  | 0.019230  |
| 2                | 8                | 0              | -0.578757               | 0.049133  | 1.168692  |
| 3                | 8                | 0              | -0.590440               | 0.249330  | -1.137560 |
| 4                | 6                | 0              | -1.915663               | -0.062459 | -0.724993 |
| 5                | 1                | 0              | -2.355007               | -0.787070 | -1.412434 |
| 6                | 1                | 0              | -2.528454               | 0.846802  | -0.728080 |
| 7                | 6                | 0              | -1.742922               | -0.613622 | 0.696999  |
| 8                | 1                | 0              | -2.584575               | -0.391835 | 1.354247  |
| 9                | 1                | 0              | -1.572263               | -1.695874 | 0.680248  |
| 10               | 7                | 0              | 0.941424                | 1.701625  | 0.185484  |
| 11               | 1                | 0              | 1.526825                | 1.704445  | 1.019063  |
| 12               | 1                | 0              | 1.526680                | 1.894630  | -0.625124 |
| 13               | 1                | 0              | 0.227353                | 2.422776  | 0.271676  |
| 14               | 17               | 0              | 1.725372                | -0.908865 | -0.119719 |

### 16-Cl<sup>-</sup> complex

E = -1093.7443949 a.u.

| Center<br>Number | Atomic<br>Number | Atomic<br>Type | Coordinates (Angstroms) |           |           |
|------------------|------------------|----------------|-------------------------|-----------|-----------|
|                  |                  |                | X                       | Y         | Z         |
| 1                | 5                | 0              | 0.430957                | 0.008469  | 0.254964  |
| 2                | 6                | 0              | -2.173596               | 0.016994  | -0.128469 |
| 3                | 1                | 0              | -2.907329               | -0.002157 | -0.933671 |
| 4                | 1                | 0              | -2.663185               | 0.326275  | 0.796285  |
| 5                | 6                | 0              | -1.478509               | -1.331172 | 0.038609  |
| 6                | 1                | 0              | -2.083483               | -2.037884 | 0.609815  |
| 7                | 1                | 0              | -1.253404               | -1.762733 | -0.943217 |
| 8                | 7                | 0              | 1.096566                | 0.698641  | 1.567533  |
| 9                | 1                | 0              | 1.700588                | 0.019129  | 2.030944  |
| 10               | 1                | 0              | 1.653124                | 1.513202  | 1.315987  |
| 11               | 1                | 0              | 0.354205                | 0.981994  | 2.205215  |
| 12               | 16               | 0              | -0.830106               | 1.189140  | -0.561397 |
| 13               | 8                | 0              | -0.274841               | -1.105468 | 0.751631  |
| 14               | 17               | 0              | 1.927164                | -0.368711 | -0.812967 |

**17-Cl<sup>-</sup> complex**

E = -1073.8591905 a.u.

| Center<br>Number | Atomic<br>Number | Atomic<br>Type | Coordinates (Angstroms) |           |           |
|------------------|------------------|----------------|-------------------------|-----------|-----------|
|                  |                  |                | X                       | Y         | Z         |
| 1                | 5                | 0              | 0.452298                | 0.128737  | 0.170727  |
| 2                | 6                | 0              | -2.081626               | -0.218491 | -0.560462 |
| 3                | 1                | 0              | -3.064699               | -0.558377 | -0.234323 |
| 4                | 1                | 0              | -2.032269               | -0.255857 | -1.650418 |
| 5                | 6                | 0              | -1.742455               | 1.180242  | -0.040501 |
| 6                | 1                | 0              | -2.257328               | 1.959124  | -0.608589 |
| 7                | 1                | 0              | -2.082411               | 1.258658  | 0.998987  |
| 8                | 7                | 0              | 1.027650                | 0.186305  | 1.709231  |
| 9                | 1                | 0              | 1.514969                | -0.670352 | 1.967223  |
| 10               | 1                | 0              | 1.670250                | 0.973271  | 1.794821  |
| 11               | 1                | 0              | 0.243580                | 0.320166  | 2.345800  |
| 12               | 16               | 0              | -0.795878               | -1.328591 | 0.126088  |
| 13               | 7                | 0              | -0.293950               | 1.378118  | -0.100502 |
| 14               | 1                | 0              | -0.003848               | 1.843509  | -0.949618 |
| 15               | 17               | 0              | 2.017230                | -0.057520 | -0.834721 |

**18-Cl<sup>-</sup> complex**

E = -750.9047721 a.u.

| Center<br>Number | Atomic<br>Number | Atomic<br>Type | Coordinates (Angstroms) |           |           |
|------------------|------------------|----------------|-------------------------|-----------|-----------|
|                  |                  |                | X                       | Y         | Z         |
| 1                | 5                | 0              | -0.243270               | 0.250609  | 0.015009  |
| 2                | 8                | 0              | 0.568134                | 0.204879  | -1.148629 |
| 3                | 6                | 0              | 1.748532                | -0.506917 | -0.797591 |
| 4                | 1                | 0              | 2.558221                | -0.209769 | -1.465835 |
| 5                | 1                | 0              | 1.572621                | -1.584257 | -0.904557 |
| 6                | 6                | 0              | 1.992855                | -0.136063 | 0.672545  |
| 7                | 1                | 0              | 2.502327                | -0.930938 | 1.220334  |
| 8                | 1                | 0              | 2.610020                | 0.766886  | 0.739931  |
| 9                | 7                | 0              | -0.964550               | 1.719920  | -0.040757 |
| 10               | 1                | 0              | -1.475255               | 1.822030  | -0.916183 |
| 11               | 1                | 0              | -1.612212               | 1.831975  | 0.735671  |
| 12               | 1                | 0              | -0.242115               | 2.435392  | 0.015445  |
| 13               | 7                | 0              | 0.642123                | 0.120241  | 1.199044  |
| 14               | 1                | 0              | 0.353954                | -0.540839 | 1.904422  |
| 15               | 17               | 0              | -1.752212               | -0.912106 | 0.025119  |

**19-Cl<sup>-</sup> complex**

E = -1017.5858895 a.u.

| Center<br>Number | Atomic<br>Number | Atomic<br>Type | Coordinates (Angstroms) |           |           |
|------------------|------------------|----------------|-------------------------|-----------|-----------|
|                  |                  |                | X                       | Y         | Z         |
| 1                | 5                | 0              | 0.468871                | 0.153358  | 0.189162  |
| 2                | 6                | 0              | -2.081425               | -0.236043 | -0.581678 |
| 3                | 1                | 0              | -3.123149               | -0.474834 | -0.361036 |
| 4                | 1                | 0              | -1.901945               | -0.380242 | -1.648981 |
| 5                | 6                | 0              | -1.732038               | 1.205681  | -0.180764 |
| 6                | 1                | 0              | -2.199381               | 1.934354  | -0.847204 |
| 7                | 1                | 0              | -2.130473               | 1.400123  | 0.823704  |
| 8                | 7                | 0              | 1.180703                | 0.413492  | 1.655716  |
| 9                | 1                | 0              | 1.698533                | -0.400182 | 1.983522  |
| 10               | 1                | 0              | 1.820582                | 1.203249  | 1.574044  |
| 11               | 1                | 0              | 0.463645                | 0.645507  | 2.341253  |
| 12               | 7                | 0              | -0.277128               | 1.380270  | -0.178448 |
| 13               | 1                | 0              | 0.060550                | 1.849214  | -1.006727 |
| 14               | 15               | 0              | -0.892153               | -1.292019 | 0.418362  |
| 15               | 1                | 0              | -0.429231               | -2.159003 | -0.594968 |
| 16               | 17               | 0              | 1.960857                | -0.198756 | -0.897122 |

**20-Cl<sup>-</sup> complex**

E = -731.0193002 a.u.

| Center<br>Number | Atomic<br>Number | Atomic<br>Type | Coordinates (Angstroms) |           |           |
|------------------|------------------|----------------|-------------------------|-----------|-----------|
|                  |                  |                | X                       | Y         | Z         |
| 1                | 5                | 0              | 0.256052                | 0.240236  | 0.036832  |
| 2                | 6                | 0              | -1.845256               | -0.646600 | 0.651303  |
| 3                | 1                | 0              | -2.716090               | -0.487530 | 1.293070  |
| 4                | 1                | 0              | -1.709491               | -1.728432 | 0.508624  |
| 5                | 6                | 0              | -1.993285               | 0.045127  | -0.709964 |
| 6                | 1                | 0              | -2.544005               | -0.563376 | -1.429038 |
| 7                | 1                | 0              | -2.538229               | 0.987758  | -0.585072 |
| 8                | 7                | 0              | 0.987023                | 1.704667  | 0.259718  |
| 9                | 1                | 0              | 1.579714                | 1.712570  | 1.087223  |
| 10               | 1                | 0              | 1.550760                | 1.944104  | -0.553186 |
| 11               | 1                | 0              | 0.245041                | 2.393116  | 0.371175  |
| 12               | 7                | 0              | -0.618663               | 0.316221  | -1.162524 |
| 13               | 7                | 0              | -0.639886               | -0.009418 | 1.193703  |
| 14               | 1                | 0              | -0.337141               | -0.260028 | -1.941845 |
| 15               | 1                | 0              | -0.250605               | -0.500917 | 1.986493  |
| 16               | 17               | 0              | 1.786571                | -0.892346 | -0.153289 |

## 22-Cl<sup>-</sup> complex

E = -849.3413437 a.u.

| Center<br>Number | Atomic<br>Number | Atomic<br>Type | Coordinates (Angstroms) |           |           |
|------------------|------------------|----------------|-------------------------|-----------|-----------|
|                  |                  |                | X                       | Y         | Z         |
| 1                | 6                | 0              | -2.154909               | -0.008449 | 0.941426  |
| 2                | 6                | 0              | -2.161454               | -0.506638 | -0.507995 |
| 3                | 1                | 0              | -2.648978               | -0.714638 | 1.613932  |
| 4                | 1                | 0              | -2.669672               | 0.957716  | 1.011554  |
| 5                | 1                | 0              | -3.041278               | -0.186875 | -1.067196 |
| 6                | 1                | 0              | -2.105814               | -1.602383 | -0.541734 |
| 7                | 7                | 0              | -0.718930               | 0.116712  | 1.209617  |
| 8                | 1                | 0              | -0.500360               | 0.741447  | 1.972117  |
| 9                | 8                | 0              | -0.996595               | 0.050360  | -1.108116 |
| 10               | 5                | 0              | -0.090917               | 0.386196  | -0.094340 |
| 11               | 6                | 0              | 0.741109                | -2.083415 | -0.561425 |
| 12               | 1                | 0              | 0.152172                | -2.453718 | 0.282899  |
| 13               | 1                | 0              | 0.133602                | -2.010154 | -1.458351 |
| 14               | 1                | 0              | 1.606814                | -2.722949 | -0.736255 |
| 15               | 6                | 0              | 2.134735                | -0.759391 | 0.827498  |
| 16               | 1                | 0              | 2.986994                | -1.384184 | 0.558996  |
| 17               | 1                | 0              | 2.453318                | 0.269633  | 0.969968  |
| 18               | 1                | 0              | 1.635840                | -1.138500 | 1.722598  |
| 19               | 8                | 0              | 1.209077                | -0.762707 | -0.266092 |
| 20               | 17               | 0              | 0.848689                | 1.961340  | -0.325147 |

### 23-Cl<sup>-</sup> complex

E = -868.8015143 a.u.

| Center<br>Number | Atomic<br>Number | Atomic<br>Type | Coordinates (Angstroms) |           |           |
|------------------|------------------|----------------|-------------------------|-----------|-----------|
|                  |                  |                | X                       | Y         | Z         |
| 1                | 6                | 0              | -2.447591               | -0.235364 | 0.655655  |
| 2                | 6                | 0              | -2.172690               | -0.823953 | -0.728930 |
| 3                | 1                | 0              | -3.061648               | -0.900205 | 1.268922  |
| 4                | 1                | 0              | -2.966370               | 0.727021  | 0.553431  |
| 5                | 1                | 0              | -2.958057               | -0.600778 | -1.452859 |
| 6                | 1                | 0              | -2.052067               | -1.914322 | -0.666554 |
| 7                | 7                | 0              | -1.089108               | -0.072985 | 1.187507  |
| 8                | 1                | 0              | -1.054423               | 0.602996  | 1.938562  |
| 9                | 8                | 0              | -0.952285               | -0.232049 | -1.152438 |
| 10               | 5                | 0              | -0.261070               | 0.252085  | -0.008376 |
| 11               | 7                | 0              | 1.199332                | -0.543134 | 0.056124  |
| 12               | 6                | 0              | 1.938868                | -0.196622 | 1.291191  |
| 13               | 1                | 0              | 2.871598                | -0.764498 | 1.328083  |
| 14               | 1                | 0              | 2.148182                | 0.871276  | 1.289931  |
| 15               | 1                | 0              | 1.313314                | -0.451193 | 2.146518  |
| 16               | 6                | 0              | 0.902469                | -1.998901 | 0.064867  |
| 17               | 1                | 0              | 0.406558                | -2.253875 | -0.870006 |
| 18               | 1                | 0              | 1.837076                | -2.556026 | 0.159750  |
| 19               | 1                | 0              | 0.241290                | -2.208591 | 0.903616  |
| 20               | 6                | 0              | 2.023020                | -0.235656 | -1.139613 |
| 21               | 1                | 0              | 2.324875                | 0.808140  | -1.106544 |
| 22               | 1                | 0              | 2.901515                | -0.885340 | -1.148553 |
| 23               | 1                | 0              | 1.412177                | -0.407698 | -2.025183 |
| 24               | 17               | 0              | 0.195505                | 2.104993  | -0.154245 |

## 24-Cl<sup>-</sup> complex

E = -1155.3976469 a.u.

| Center<br>Number | Atomic<br>Number | Atomic<br>Type | Coordinates (Angstroms) |           |           |
|------------------|------------------|----------------|-------------------------|-----------|-----------|
|                  |                  |                | X                       | Y         | Z         |
| 1                | 6                | 0              | 2.402576                | -1.083559 | 0.669317  |
| 2                | 6                | 0              | 2.529522                | -0.648543 | -0.795991 |
| 3                | 1                | 0              | 3.332410                | -0.950093 | 1.225484  |
| 4                | 1                | 0              | 2.125627                | -2.143049 | 0.726864  |
| 5                | 1                | 0              | 2.859711                | -1.445379 | -1.464774 |
| 6                | 1                | 0              | 3.211170                | 0.205603  | -0.891037 |
| 7                | 7                | 0              | 1.318689                | -0.240995 | 1.198061  |
| 8                | 1                | 0              | 1.631337                | 0.441529  | 1.873340  |
| 9                | 8                | 0              | 1.211354                | -0.250757 | -1.160623 |
| 10               | 5                | 0              | 0.608594                | 0.309685  | 0.004514  |
| 11               | 15               | 0              | -1.283004               | -0.331411 | -0.012406 |
| 12               | 6                | 0              | -1.292825               | -2.148187 | 0.045077  |
| 13               | 1                | 0              | -2.306722               | -2.547143 | 0.098656  |
| 14               | 1                | 0              | -0.791812               | -2.524419 | -0.848029 |
| 15               | 1                | 0              | -0.723654               | -2.457519 | 0.923880  |
| 16               | 6                | 0              | -2.223979               | 0.232585  | 1.435328  |
| 17               | 1                | 0              | -2.286078               | 1.321391  | 1.406923  |
| 18               | 1                | 0              | -3.225842               | -0.198892 | 1.454224  |
| 19               | 1                | 0              | -1.674926               | -0.062341 | 2.331287  |
| 20               | 6                | 0              | -2.233002               | 0.154900  | -1.483770 |
| 21               | 1                | 0              | -3.237058               | -0.272147 | -1.473597 |
| 22               | 1                | 0              | -2.290819               | 1.244093  | -1.511629 |
| 23               | 1                | 0              | -1.691788               | -0.184467 | -2.368426 |
| 24               | 17               | 0              | 0.426772                | 2.214436  | 0.021125  |

## 26-Cl<sup>-</sup> complex

E = -1302.6478631 a.u.

| Center<br>Number | Atomic<br>Number | Atomic<br>Type | Coordinates (Angstroms) |           |           |
|------------------|------------------|----------------|-------------------------|-----------|-----------|
|                  |                  |                | X                       | Y         | Z         |
| 1                | 6                | 0              | 2.708603                | -1.103789 | 0.606957  |
| 2                | 6                | 0              | 2.765385                | -0.625614 | -0.851438 |
| 3                | 1                | 0              | 3.637008                | -0.895486 | 1.143059  |
| 4                | 1                | 0              | 2.540453                | -2.189028 | 0.646613  |
| 5                | 1                | 0              | 3.116176                | -1.387910 | -1.550249 |
| 6                | 1                | 0              | 3.400826                | 0.263812  | -0.943096 |
| 7                | 7                | 0              | 1.563409                | -0.377725 | 1.175404  |
| 8                | 1                | 0              | 1.816897                | 0.225802  | 1.943708  |
| 9                | 8                | 0              | 1.422158                | -0.285341 | -1.165169 |
| 10               | 5                | 0              | 0.870657                | 0.293934  | 0.021335  |
| 11               | 6                | 0              | -0.754600               | 0.030455  | 0.001394  |
| 12               | 16               | 0              | -1.970527               | 1.217968  | -0.033658 |
| 13               | 6                | 0              | -2.684588               | -1.209389 | -0.008993 |
| 14               | 6                | 0              | -3.219260               | 0.028067  | -0.033477 |
| 15               | 1                | 0              | -3.197745               | -2.158681 | -0.001749 |
| 16               | 1                | 0              | -4.264891               | 0.288899  | -0.049868 |
| 17               | 7                | 0              | -1.301369               | -1.181035 | 0.010367  |
| 18               | 6                | 0              | -0.480398               | -2.400793 | 0.053423  |
| 19               | 1                | 0              | 0.127530                | -2.368067 | 0.957054  |
| 20               | 1                | 0              | -1.145671               | -3.261173 | 0.051881  |
| 21               | 1                | 0              | 0.171488                | -2.409792 | -0.818532 |
| 22               | 17               | 0              | 1.044158                | 2.224407  | 0.086282  |



## 27-Cl<sup>-</sup> complex

E = -999.1337217 a.u.

---

| Center<br>Number | Atomic<br>Number | Atomic<br>Type | Coordinates (Angstroms) |           |           |
|------------------|------------------|----------------|-------------------------|-----------|-----------|
|                  |                  |                | X                       | Y         | Z         |
| 1                | 6                | 0              | 2.684100                | 0.930285  | 1.072818  |
| 2                | 6                | 0              | 2.754912                | -0.595271 | 0.958582  |
| 3                | 1                | 0              | 3.627595                | 1.416558  | 0.817588  |
| 4                | 1                | 0              | 2.421465                | 1.217142  | 2.096696  |
| 5                | 1                | 0              | 3.108439                | -1.090732 | 1.865004  |
| 6                | 1                | 0              | 3.387218                | -0.894341 | 0.112791  |
| 7                | 7                | 0              | 1.601708                | 1.313059  | 0.148886  |
| 8                | 1                | 0              | 1.974476                | 1.711642  | -0.703098 |
| 9                | 8                | 0              | 1.410544                | -0.980816 | 0.710321  |
| 10               | 5                | 0              | 0.829831                | 0.041868  | -0.105484 |
| 11               | 6                | 0              | -2.926874               | 0.649216  | 0.331646  |
| 12               | 6                | 0              | -2.860458               | -0.698527 | 0.445621  |
| 13               | 1                | 0              | -3.765316               | 1.323114  | 0.362982  |
| 14               | 1                | 0              | -3.630697               | -1.434395 | 0.599415  |
| 15               | 6                | 0              | -0.780850               | 0.058043  | 0.146970  |
| 16               | 7                | 0              | -1.634102               | 1.095771  | 0.153272  |
| 17               | 7                | 0              | -1.531635               | -1.041961 | 0.329501  |
| 18               | 6                | 0              | -1.274195               | 2.488243  | -0.106198 |
| 19               | 1                | 0              | -0.231550               | 2.623927  | 0.175938  |
| 20               | 1                | 0              | -1.405181               | 2.704691  | -1.167228 |
| 21               | 1                | 0              | -1.922841               | 3.130681  | 0.488114  |
| 22               | 6                | 0              | -1.012915               | -2.409855 | 0.350635  |
| 23               | 1                | 0              | -0.293091               | -2.522346 | -0.458086 |
| 24               | 1                | 0              | -0.512851               | -2.602045 | 1.297195  |
| 25               | 1                | 0              | -1.852599               | -3.088267 | 0.209628  |
| 26               | 17               | 0              | 0.888665                | -0.409373 | -2.027891 |

---

## 28-Cl<sup>-</sup> complex

E = -1152.758439 a.u.

| Center<br>Number | Atomic<br>Number | Atomic<br>Type | Coordinates (Angstroms) |           |           |
|------------------|------------------|----------------|-------------------------|-----------|-----------|
|                  |                  |                | X                       | Y         | Z         |
| 1                | 6                | 0              | -3.573724               | 1.181814  | -0.951206 |
| 2                | 6                | 0              | -3.628797               | -0.318615 | -1.251887 |
| 3                | 1                | 0              | -4.541523               | 1.586134  | -0.648690 |
| 4                | 1                | 0              | -3.239776               | 1.730253  | -1.838776 |
| 5                | 1                | 0              | -3.897765               | -0.553752 | -2.283371 |
| 6                | 1                | 0              | -4.323605               | -0.827233 | -0.571378 |
| 7                | 7                | 0              | -2.571384               | 1.298621  | 0.122320  |
| 8                | 1                | 0              | -3.010040               | 1.462832  | 1.018891  |
| 9                | 8                | 0              | -2.302608               | -0.764371 | -1.004349 |
| 10               | 5                | 0              | -1.797447               | 0.005875  | 0.091757  |
| 11               | 6                | 0              | 1.977396                | 0.739107  | 0.002859  |
| 12               | 6                | 0              | 1.952559                | -0.638798 | -0.211831 |
| 13               | 6                | 0              | -0.160950               | 0.076894  | -0.030375 |
| 14               | 7                | 0              | 0.616334                | -1.003552 | -0.236765 |
| 15               | 7                | 0              | 0.652962                | 1.141632  | 0.103159  |
| 16               | 6                | 0              | 0.157949                | -2.384257 | -0.351328 |
| 17               | 1                | 0              | 0.699191                | -2.861432 | -1.169119 |
| 18               | 1                | 0              | 0.348886                | -2.907090 | 0.587025  |
| 19               | 1                | 0              | -0.906974               | -2.382112 | -0.565405 |
| 20               | 6                | 0              | 0.261147                | 2.525607  | 0.345829  |
| 21               | 1                | 0              | 0.587569                | 2.822987  | 1.343882  |
| 22               | 1                | 0              | 0.738413                | 3.161542  | -0.401364 |
| 23               | 1                | 0              | -0.822723               | 2.587309  | 0.261749  |
| 24               | 6                | 0              | 3.124001                | -1.375793 | -0.353210 |
| 25               | 1                | 0              | 3.105859                | -2.446738 | -0.510355 |
| 26               | 6                | 0              | 3.172015                | 1.447053  | 0.080404  |
| 27               | 1                | 0              | 3.188605                | 2.516228  | 0.250320  |
| 28               | 6                | 0              | 4.341670                | 0.714458  | -0.063009 |
| 29               | 1                | 0              | 5.295851                | 1.223236  | -0.006251 |
| 30               | 6                | 0              | 4.317586                | -0.672767 | -0.274819 |
| 31               | 1                | 0              | 5.254286                | -1.206358 | -0.376811 |
| 32               | 17               | 0              | -1.976391               | -0.920314 | 1.818593  |

**29-Cl<sup>-</sup> complex**

E = -1021.2109716 a.u.

---

| Center<br>Number | Atomic<br>Number | Atomic<br>Type | Coordinates (Angstroms) |           |           |
|------------------|------------------|----------------|-------------------------|-----------|-----------|
|                  |                  |                | X                       | Y         | Z         |
| 1                | 6                | 0              | -2.585128               | 0.651347  | -1.519315 |
| 2                | 6                | 0              | -2.740822               | -0.806756 | -1.087205 |
| 3                | 1                | 0              | -3.532279               | 1.193921  | -1.520559 |
| 4                | 1                | 0              | -2.161936               | 0.706103  | -2.528354 |
| 5                | 1                | 0              | -2.948438               | -1.495565 | -1.908213 |
| 6                | 1                | 0              | -3.523025               | -0.908255 | -0.324502 |
| 7                | 7                | 0              | -1.640156               | 1.202245  | -0.538904 |
| 8                | 1                | 0              | -2.079133               | 1.858545  | 0.091068  |
| 9                | 8                | 0              | -1.480572               | -1.128914 | -0.520561 |
| 10               | 5                | 0              | -0.984715               | 0.036516  | 0.128174  |
| 11               | 6                | 0              | 1.366552                | 1.170099  | -0.078526 |
| 12               | 6                | 0              | 1.321221                | -1.181529 | -0.060069 |
| 13               | 6                | 0              | 2.723725                | 1.154920  | -0.379688 |
| 14               | 6                | 0              | 2.679134                | -1.219384 | -0.361360 |
| 15               | 6                | 0              | 3.383637                | -0.046967 | -0.560495 |
| 16               | 1                | 0              | 3.247614                | 2.098648  | -0.452027 |
| 17               | 1                | 0              | 3.167444                | -2.183058 | -0.419518 |
| 18               | 1                | 0              | 4.438427                | -0.068557 | -0.808505 |
| 19               | 7                | 0              | 0.668290                | 0.008249  | -0.000828 |
| 20               | 6                | 0              | 0.717294                | 2.489439  | 0.224115  |
| 21               | 1                | 0              | 0.134743                | 2.841142  | -0.625514 |
| 22               | 1                | 0              | 0.042420                | 2.397096  | 1.075352  |
| 23               | 1                | 0              | 1.498413                | 3.210153  | 0.465687  |
| 24               | 6                | 0              | 0.630676                | -2.477007 | 0.259622  |
| 25               | 1                | 0              | -0.102958               | -2.345600 | 1.052733  |
| 26               | 1                | 0              | 0.098604                | -2.860995 | -0.609589 |
| 27               | 1                | 0              | 1.387510                | -3.196280 | 0.572865  |
| 28               | 17               | 0              | -1.239643               | 0.042530  | 2.036374  |

---
